# Supplementary material for: Enantioselective synthesis of tetrafluorinated ribose and fructose
Source: Royal Society of Chemistry journal article supplement (doi:10.1039/b817260a), 2009-01-01

## Supplementary Information

### Enantioselective synthesis of tetrafluorinated ribose and fructose

Bruno Linclau,<sup>\*a</sup> A. James Boydell,<sup>a</sup> Roxana S. Timofte,<sup>a</sup> Kylie J. Brown,<sup>a</sup> Victoria Vinader,<sup>b</sup> and Alexander C. Weymouth-Wilson

Table of contents:

|                                                                                                                                                                                |     |
|--------------------------------------------------------------------------------------------------------------------------------------------------------------------------------|-----|
| 1) Determination of the enantioselectivity of the SAD reaction                                                                                                                 | p1  |
| 2) Confirmation of the <i>ee</i> of <b>11</b> and <b>20</b>                                                                                                                    | p4  |
| 3) Crystal structure of <b>22</b> .                                                                                                                                            | p5  |
| 4) Crystal Structure of <b>2</b>                                                                                                                                               | p5  |
| 5) HMBC spectra of <b>2</b> , <b>5</b> , <b>6</b> and <b>7</b>                                                                                                                 | p6  |
| 6) <sup>1</sup> H, <sup>13</sup> C and <sup>19</sup> F NMR spectra of <b>2-7</b> , <b>9-11</b> , <b>20-22</b> , <b>24</b> , <b>25</b> , <b>27</b> , <b>30</b> , <b>32-34</b> . | p11 |

#### 1) Determination of the enantioselectivity of the SAD reaction

##### a) Conversion to **(2R)-1,2-dibenzoyloxy-4-bromo-3,3,4,4-tetrafluoro-butane-1,2-diol**

To a solution of **9** (0.30 g, 1.25 mmol, 1 equiv) in pyridine (3.00 mL), BzCl (0.58 mL, 4.98 mmol, 4 equiv) was added. The reaction was stirred at RT for 2.5 h. To the reaction was added water (5 mL) and the aqueous phase was extracted with CH<sub>2</sub>Cl<sub>2</sub> (3 x 8 mL). The combined organic phase was washed with saturated aqueous NaHCO<sub>3</sub> (2 x 10 mL), 1N aqueous HCl (2 x 10 mL), brine (2 x 10 mL) and dried over MgSO<sub>4</sub>, filtered, concentrated *in vacuo* to give the crude as a transparent gel. Column chromatography (Petroleum ether/EtOAc: 90/10) gave the product the title compound as a transparent gel (0.4772 g, 1.06 mmol, 85% yield). *R*<sub>f</sub> 0.36 (Petroleum ether/ EtOAc: 90/10). **IR** (Neat): 1728 (s), 1602 (m), 1452 (m), 1274 (s), 1244 (s) cm<sup>-1</sup>. **<sup>1</sup>H NMR** (CDCl<sub>3</sub>, 400 MHz): δ 8.08–7.98 (4H, m), 7.63–7.54 (2H, m), 7.49–7.40 (4H, m), 6.21 (1H, dtd, *J*=16.3, 6.8, 3.5 Hz), 4.91 (1H, ddd, *J*=12.2, 3.4, 1.5 Hz), 4.69 (1H, dd, *J*=12.3, 7.0 Hz) ppm. **<sup>13</sup>C NMR** (CDCl<sub>3</sub>, 100 MHz): δ 165.91 (C), 164.50 (C), 134.09(C), 133.53 (C) 130.24 (2 x C, CH), 129.91 (2 x C), 129.25 (CH), 128.76 (2 x C, CH), 128.60 (2 x C, CH), 128.39 (CH), 116.69 (tt, *J*=310.6, 38.6 Hz), 113.63 (ddt, *J*=262.7, 255.0, 31.9Hz), 67.43 (dd, *J*=30.5, 22.7 Hz, CH), 60.94 (CH<sub>2</sub>) ppm. **<sup>19</sup>F NMR** (CDCl<sub>3</sub>, 282 MHz): δ -119.64 (1F, app dd, *J*=174.7, 16.0 Hz), -113.47 (1F, d, *J*=174.7 Hz), -64.29 (2F, s) ppm. **LR MS** (ES<sup>+</sup>) *m/z* (%): 471 and 473 ((M + Na)<sup>+</sup>, 1:1 ratio, 100). **HR MS** (ES<sup>+</sup>): for C<sub>18</sub>H<sub>13</sub><sup>79</sup>BrF<sub>4</sub>O<sub>4</sub>Na<sub>1</sub> (M + Na)<sup>+</sup>: calcd: 470.9826, found 470.9824.

##### b) Conversion to **(2R)-1,2-diacetoxy-4-bromo-3,3,4,4-tetrafluoro-butane-1,2-diol**

**9** (0.1 g, 0.41mmol) was dissolved in CH<sub>2</sub>Cl<sub>2</sub> (3 mL) and Et<sub>3</sub>N (0.14 mL, 1.0 mmol) and DMAP (0.005g, 0.04 mmol) were added. Acetyl chloride (0.071 mL, 1.0 mmol) was added dropwise and the reaction stirred at RT for 2 h. The reaction was quenched by the addition of HCl (0.5M, aq, 10 mL). The layers were separated and the aqueous phase extracted with CH<sub>2</sub>Cl<sub>2</sub> (2 x 5 mL), the organic phases were combined, dried over MgSO<sub>4</sub>, filtered and

concentrated *in vacuo*. Column chromatography (pentane / Et<sub>2</sub>O, 80:20) gave the title compound as a colourless oil (0.111 g, 83%).

**IR** (neat): 1752 (s), 1372 (m), 1203 (s), 1143 (s), 1085 (s). **<sup>1</sup>H NMR** (400 MHz, CDCl<sub>3</sub>): δ 5.77 (1H, dtd, *J* = 16.4, 7.1, 3.3 Hz, **CHOAc**), 4.60 (1H, ddd, *J* = 12.3, 3.3, 1.7 Hz, **CHHCH**), 4.24 (1H, dd, *J* = 12.2, 7.4 Hz, **CHHCH**), 2.15 (3H, s, **CH<sub>3</sub>**), 2.07 (3H, s, **CH<sub>3</sub>**) ppm. **<sup>13</sup>C NMR** (100 MHz, CDCl<sub>3</sub>): δ 170.2 (**CO**), 168.7 (**CO**), 66.70 (1C, dd, *J* = 30.1, 22.4 Hz, **CHCF<sub>2</sub>**), 60.1 (**CH<sub>2</sub>**), 20.5 (**CH<sub>3</sub>**), 20.3 (**CH<sub>3</sub>**) ppm. The CF<sub>2</sub>CF<sub>2</sub> carbons were not observed. **<sup>19</sup>F NMR** (282 MHz, CDCl<sub>3</sub>): δ -64.70 (2F, s, CF<sub>2</sub>Br), -114.25 (1F, d, *J* = 272.9 Hz, **CHCFF**), -120.21 (1F, dtd, *J* = 272.9, 17.2, 4.3 Hz, **CHCFE**) ppm. **CIMS**: *m/z* (%): 344 and 342 (M+NH<sub>4</sub><sup>+</sup>)<sup>+</sup> (6, 1:1 ratio) **HRMS (ES<sup>+</sup>)** for C<sub>8</sub>H<sub>9</sub><sup>79</sup>BrF<sub>4</sub>O<sub>4</sub>Na<sub>1</sub> (M + Na)<sup>+</sup>: calcd: 346.9613, found; 346.9513.

Analysis of **(2S)-1,2-dibenzoyloxy-4-bromo-3,3,4,4-tetrafluoro-butane-1,2-diol** by reverse HPLC (OJ column, IPA/hexane eluent) showed a 83% *ee* when (DHQD)<sub>2</sub>PYR was used in the AD of **8** (Figure 1).

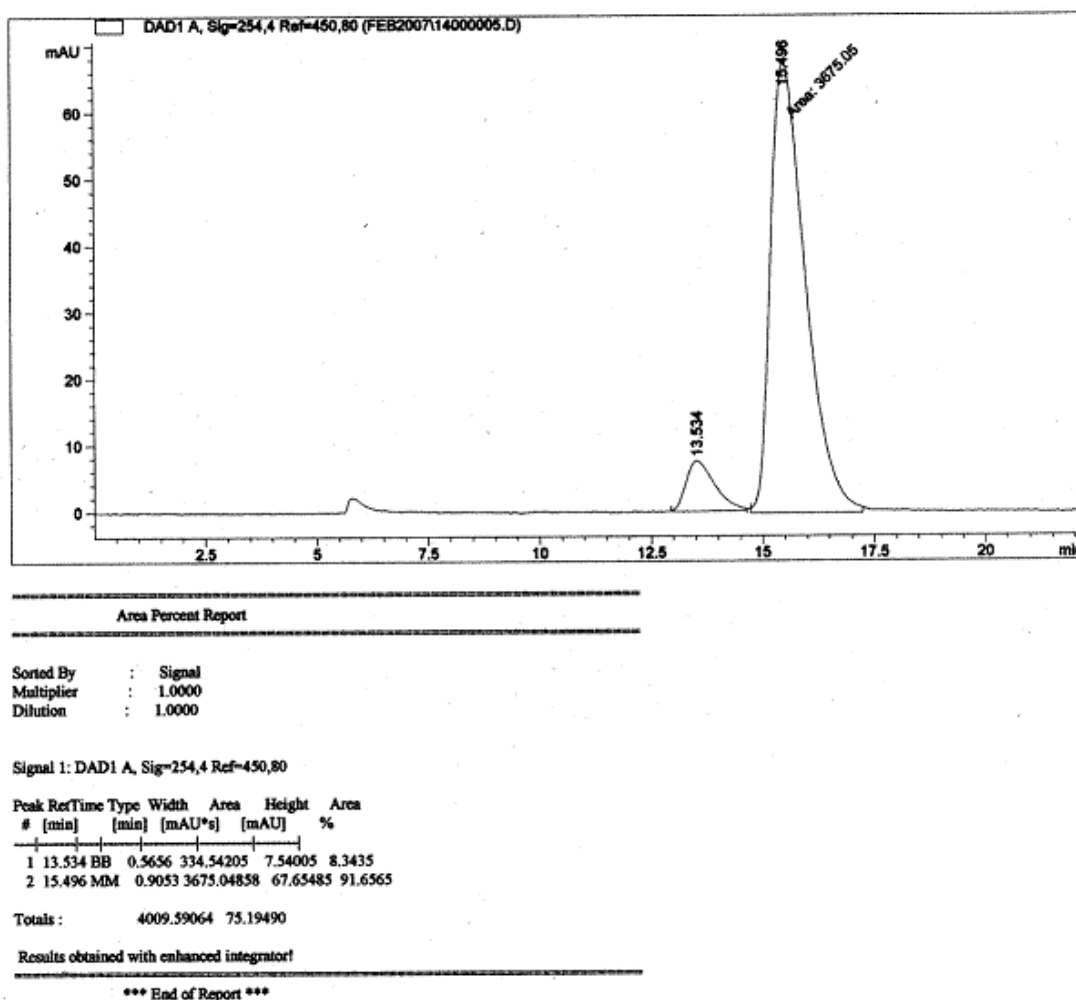

**Figure 1**

Analysis of the (2*R*)-1,2-diacetoxy-4-bromo-3,3,4,4-tetrafluoro-butane-1,2-diol by chiral GC (Chiradex G9511-16 column, ) showed a 78% *ee* when (DHQ)<sub>2</sub>PYR was used in the AD (Figure 2).

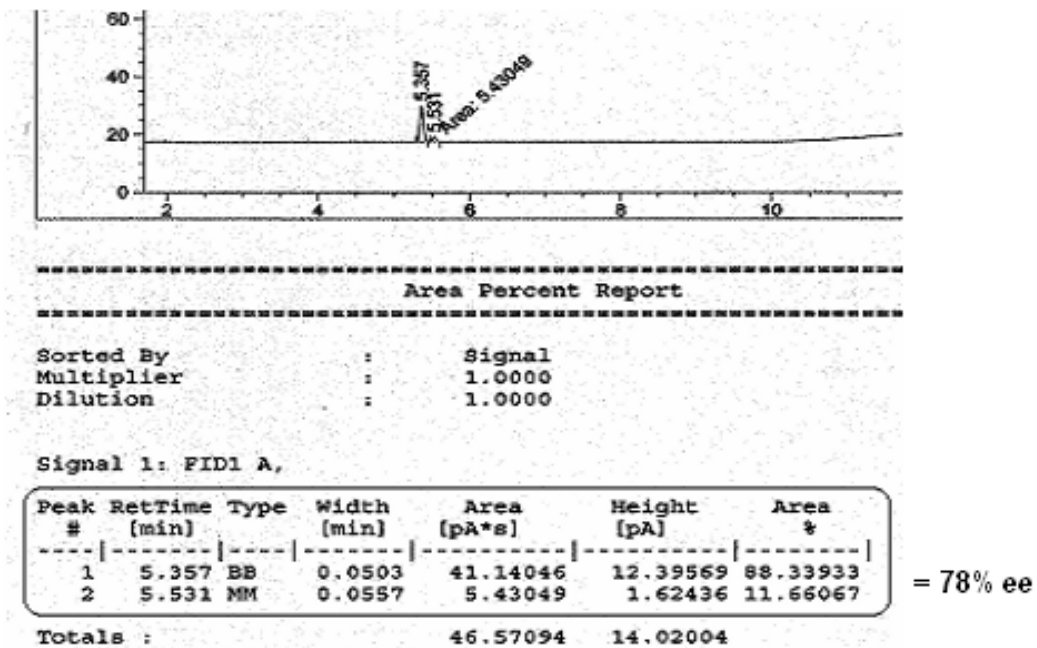

**Figure 2**

## 2) Confirmation of the *ee* of **11** and **20**

i) Alkylation under basic conditions.

The *ee* values of **11** were obtained on chiral HPLC with an OJ column. The eluent used for the resolution of **11** was 12% IPA in hexane and the concentration of the samples was 2 mg/mL. The injection volume was 10  $\mu$ L and the flow 1 mL/min. The retention times were 5.8 min for (*S*)-**11** and 6.7 min for (*R*)-**11** (Figure 3).

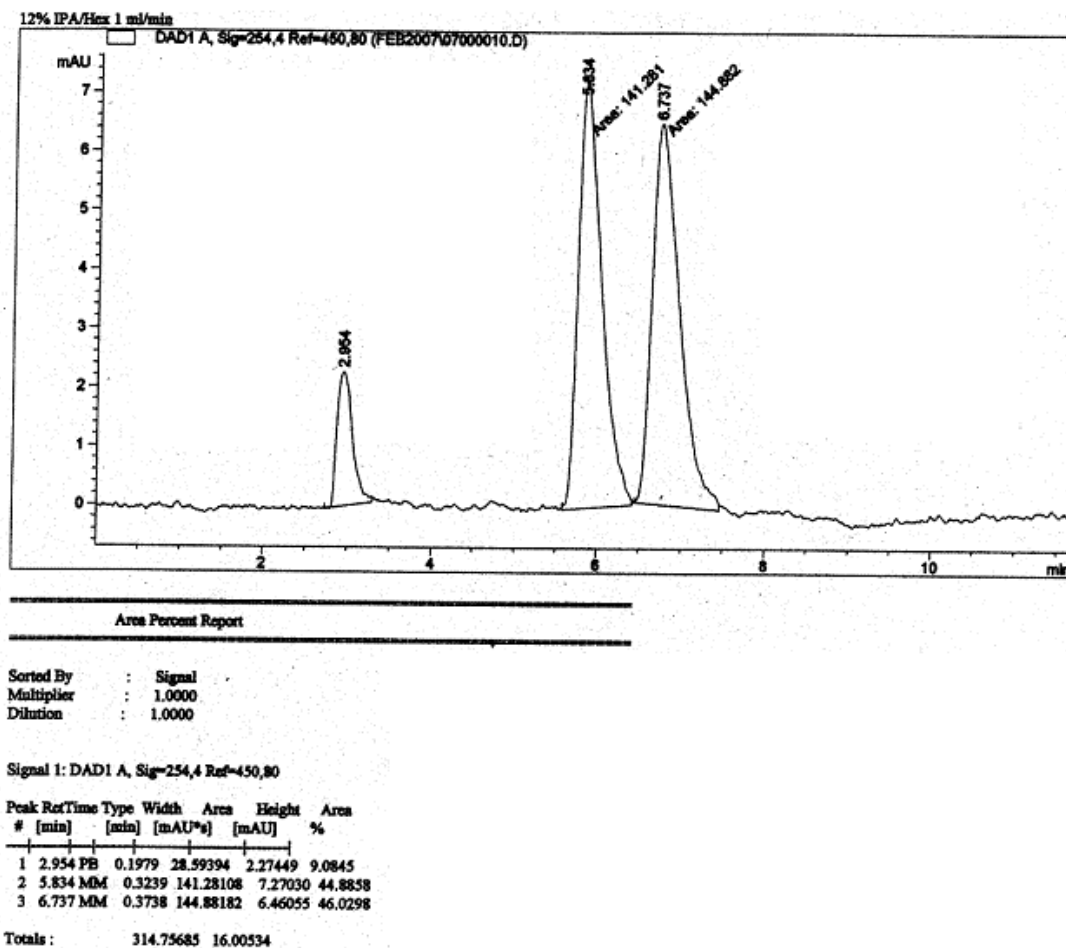

**Figure 3:** Chiral HPLC trace (OJ column) of racemic **11**.

Chiral HPLC chromatogram of a sample of **11** synthesised by treatment of **9** with  $\text{Na}_2\text{CO}_3$  and  $\text{BnBr}$ . When compared to the 83% ee observed by a similar method in section 1 the sample shows no evidence of epimerisation (Figure 4).

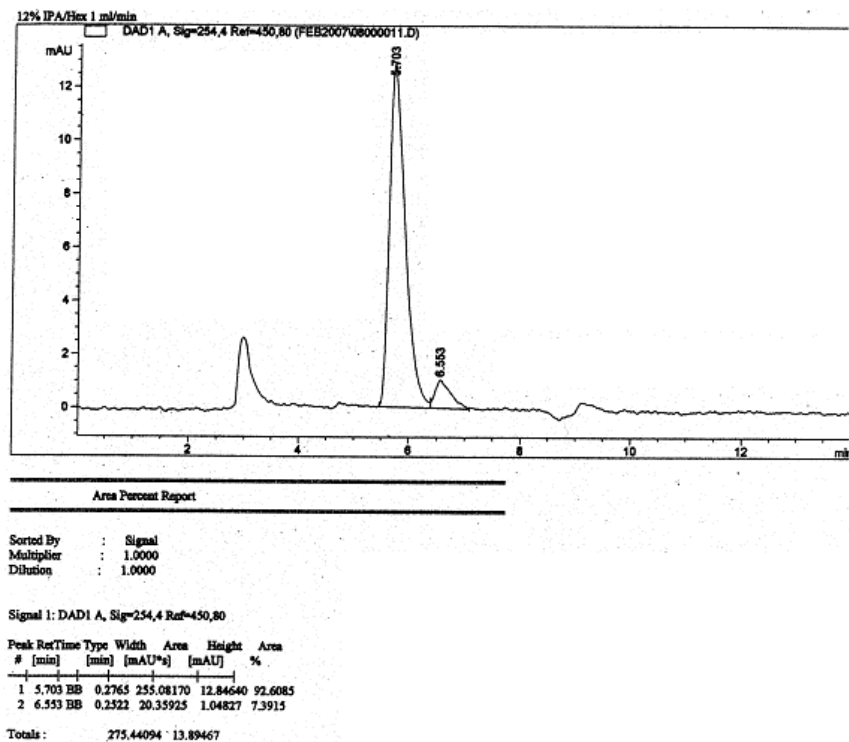

**Figure 4**

ii) Alkylation *via* the stannylene acetal methodology.

NMR analysis of the Mosher's ester of **20** showed an *ee* of 77% i.e. no reduction in *ee* after alkylation *via* a stannylene acetal (Figure 5).

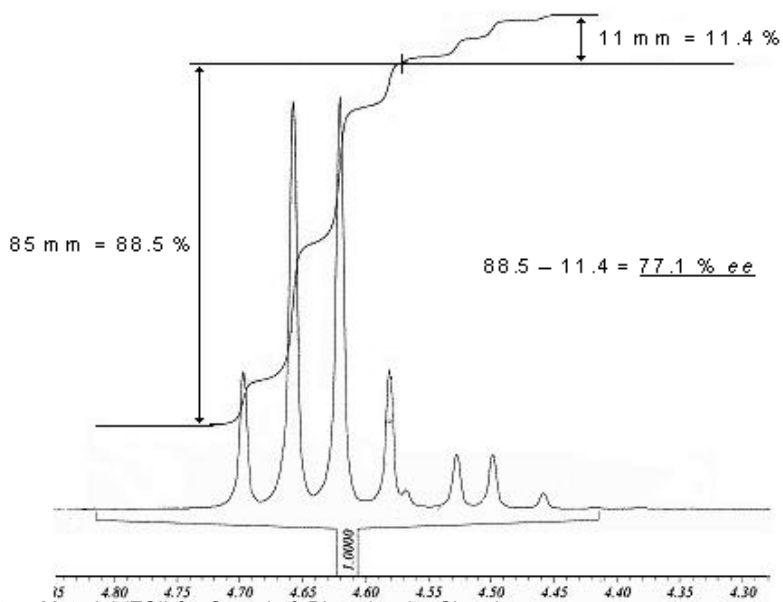

**Figure 5**

### 3) Crystal structure of **22**

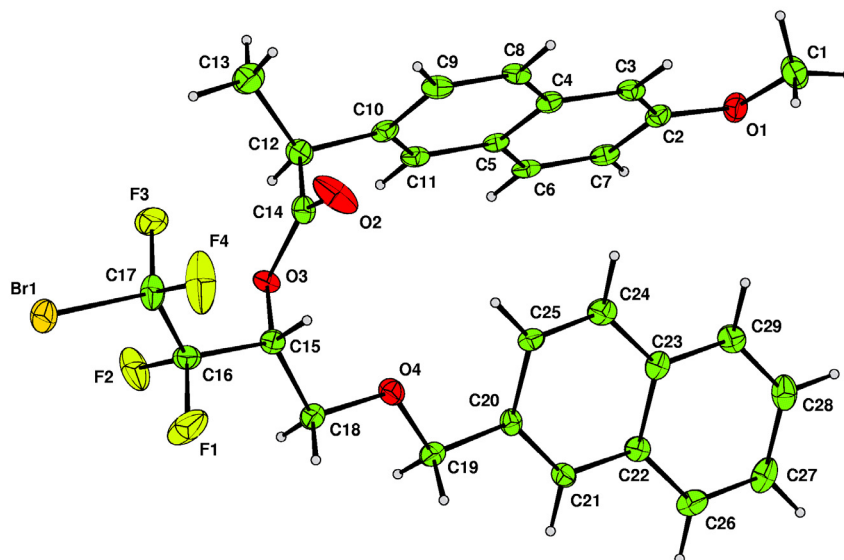

Thermal ellipsoids drawn at the 50% probability level

### 4) Crystal structure of **2**

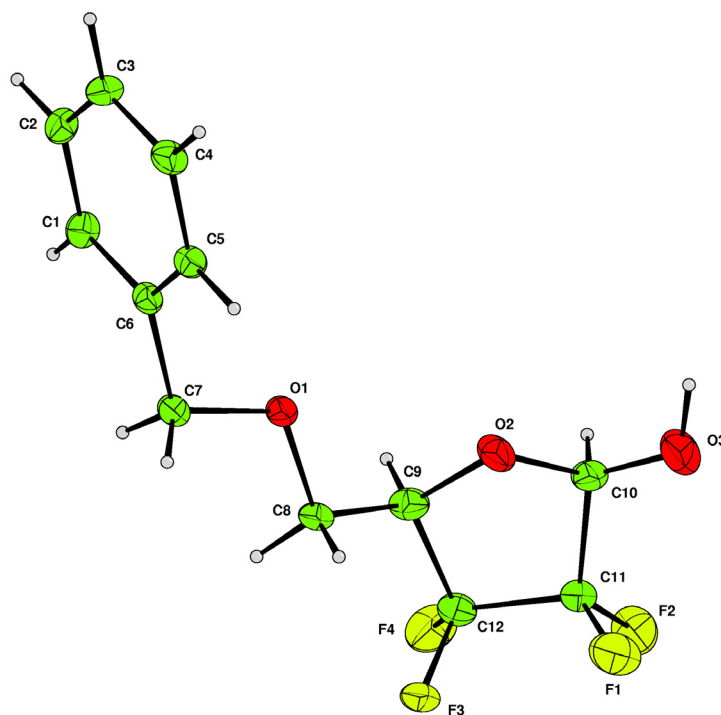

Thermal ellipsoids drawn at the 35% probability level

## 5) HMBC spectra of 2, 5, 6 and 7

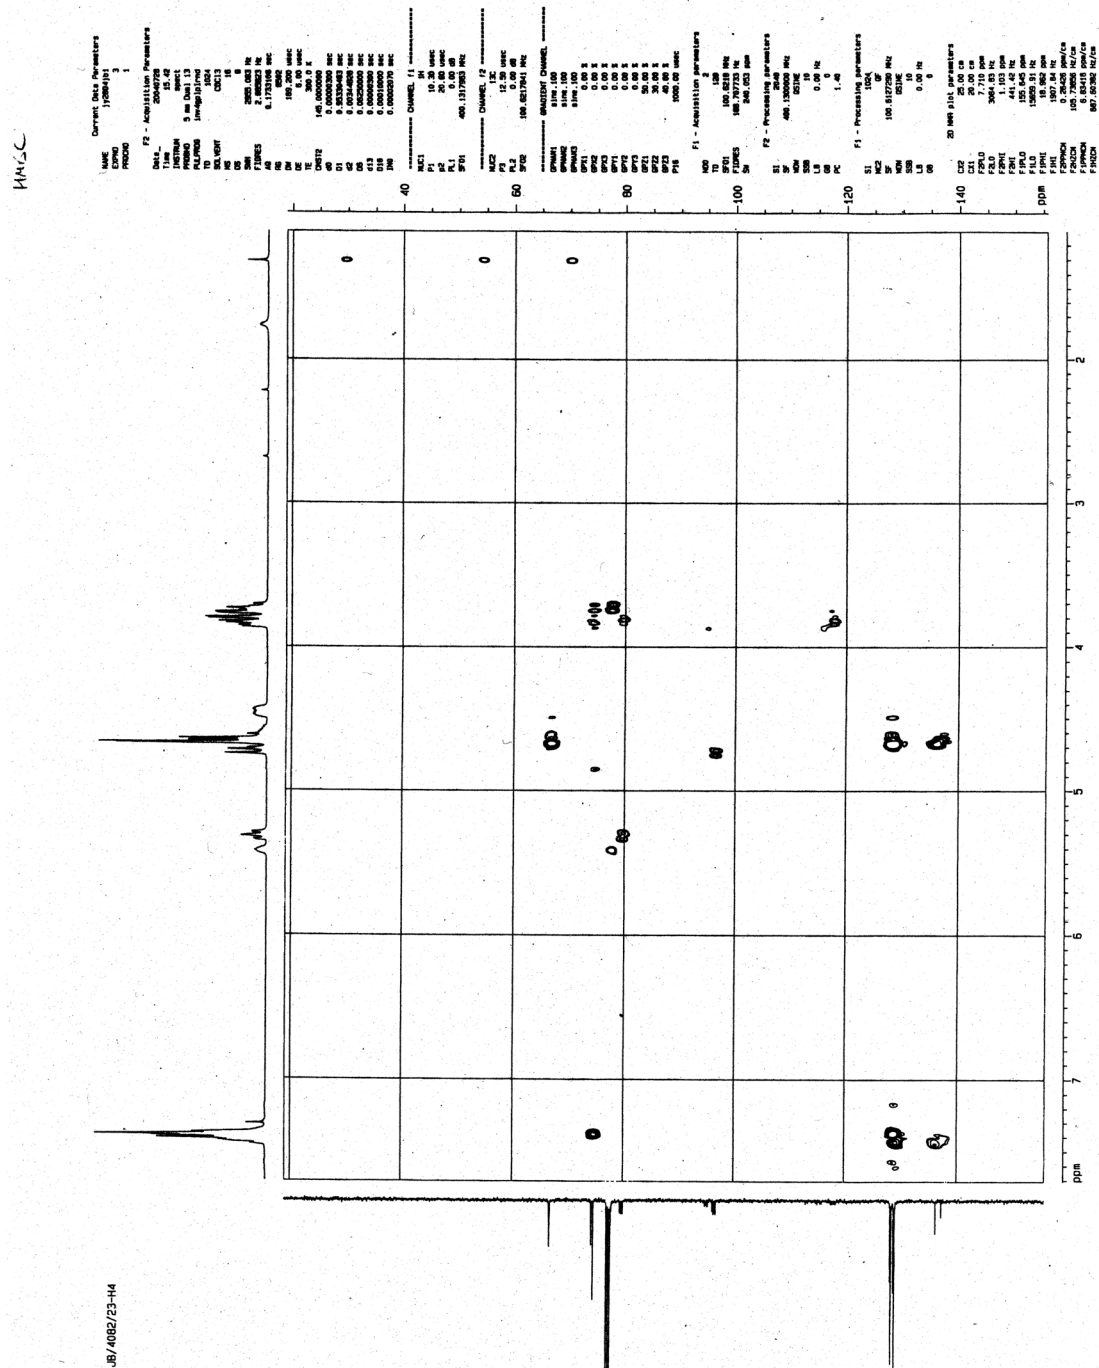

HMBC spectra of 2





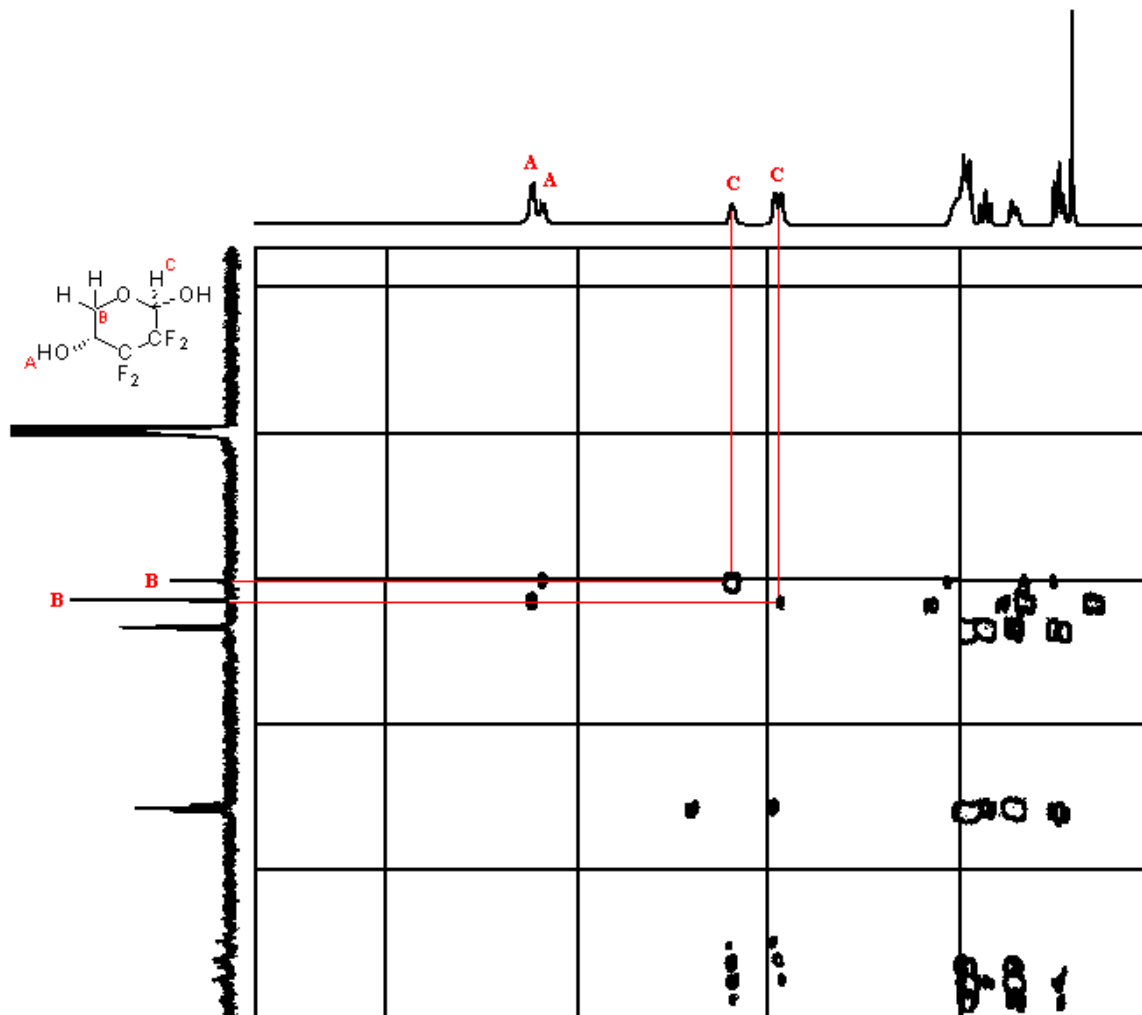

HMBC of 6

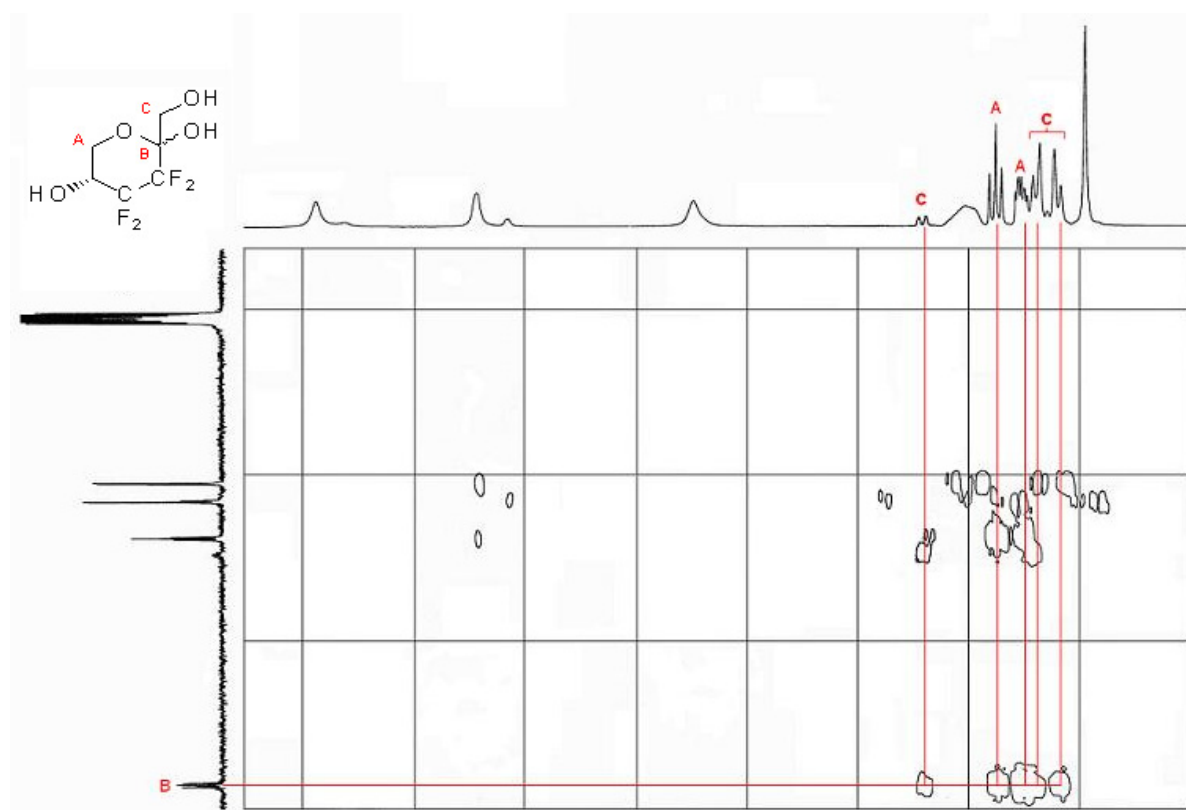

HMBC of 7





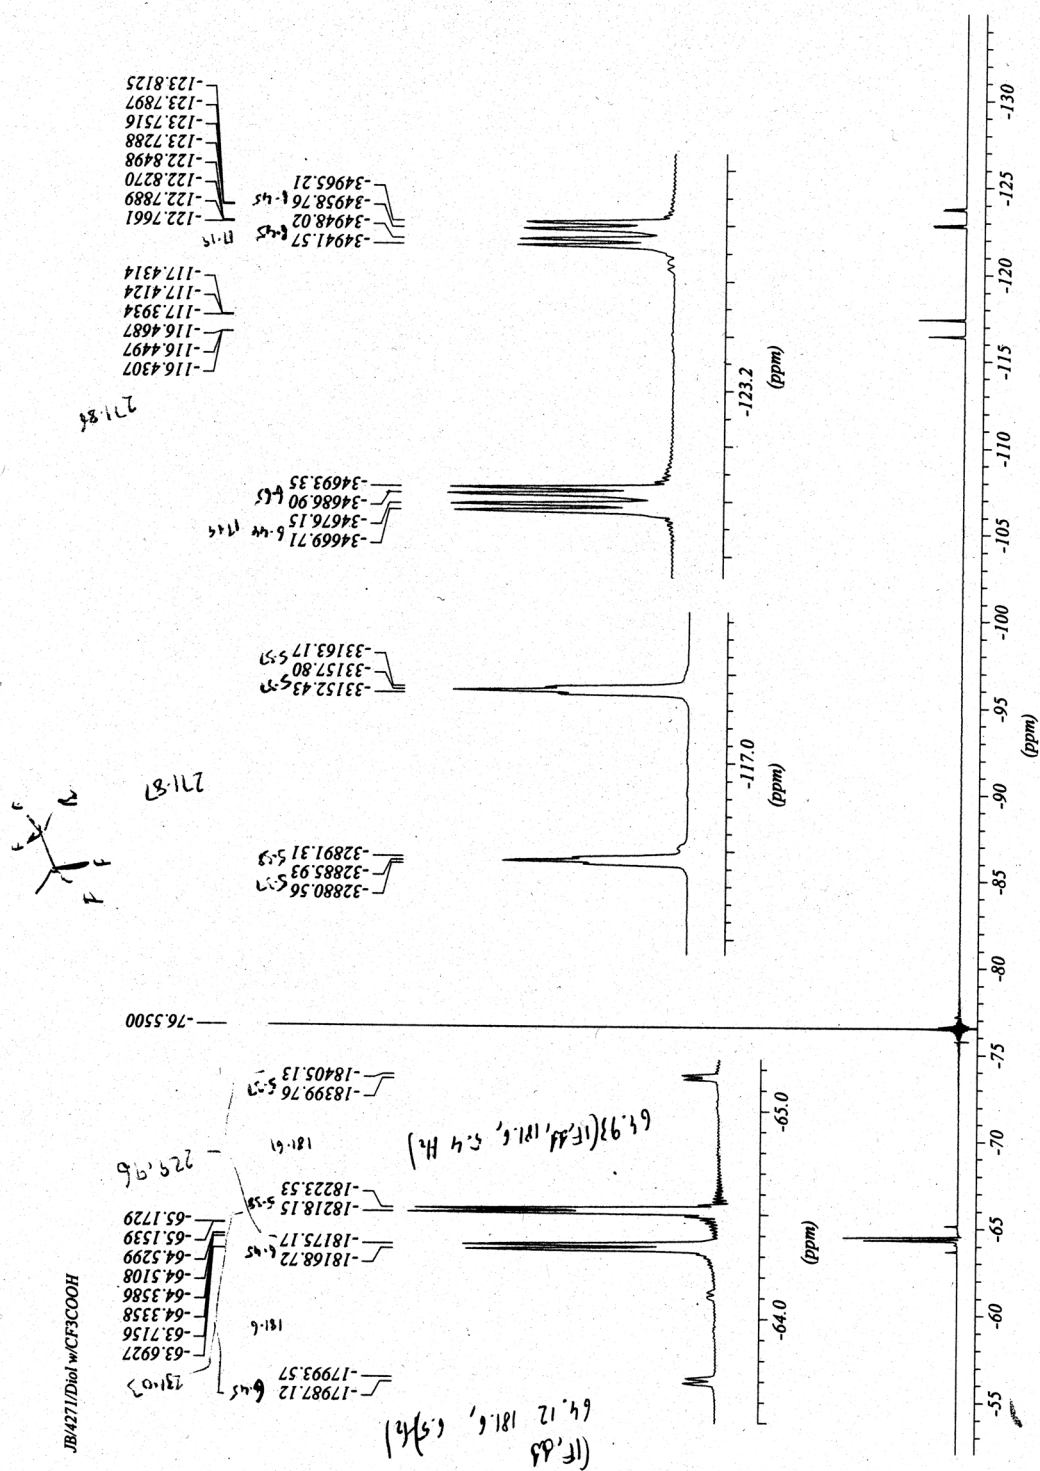

**(2R)-1-Benzyloxy-4-bromo-3,3,4,4-tetrafluorobutan-1-ol (10)**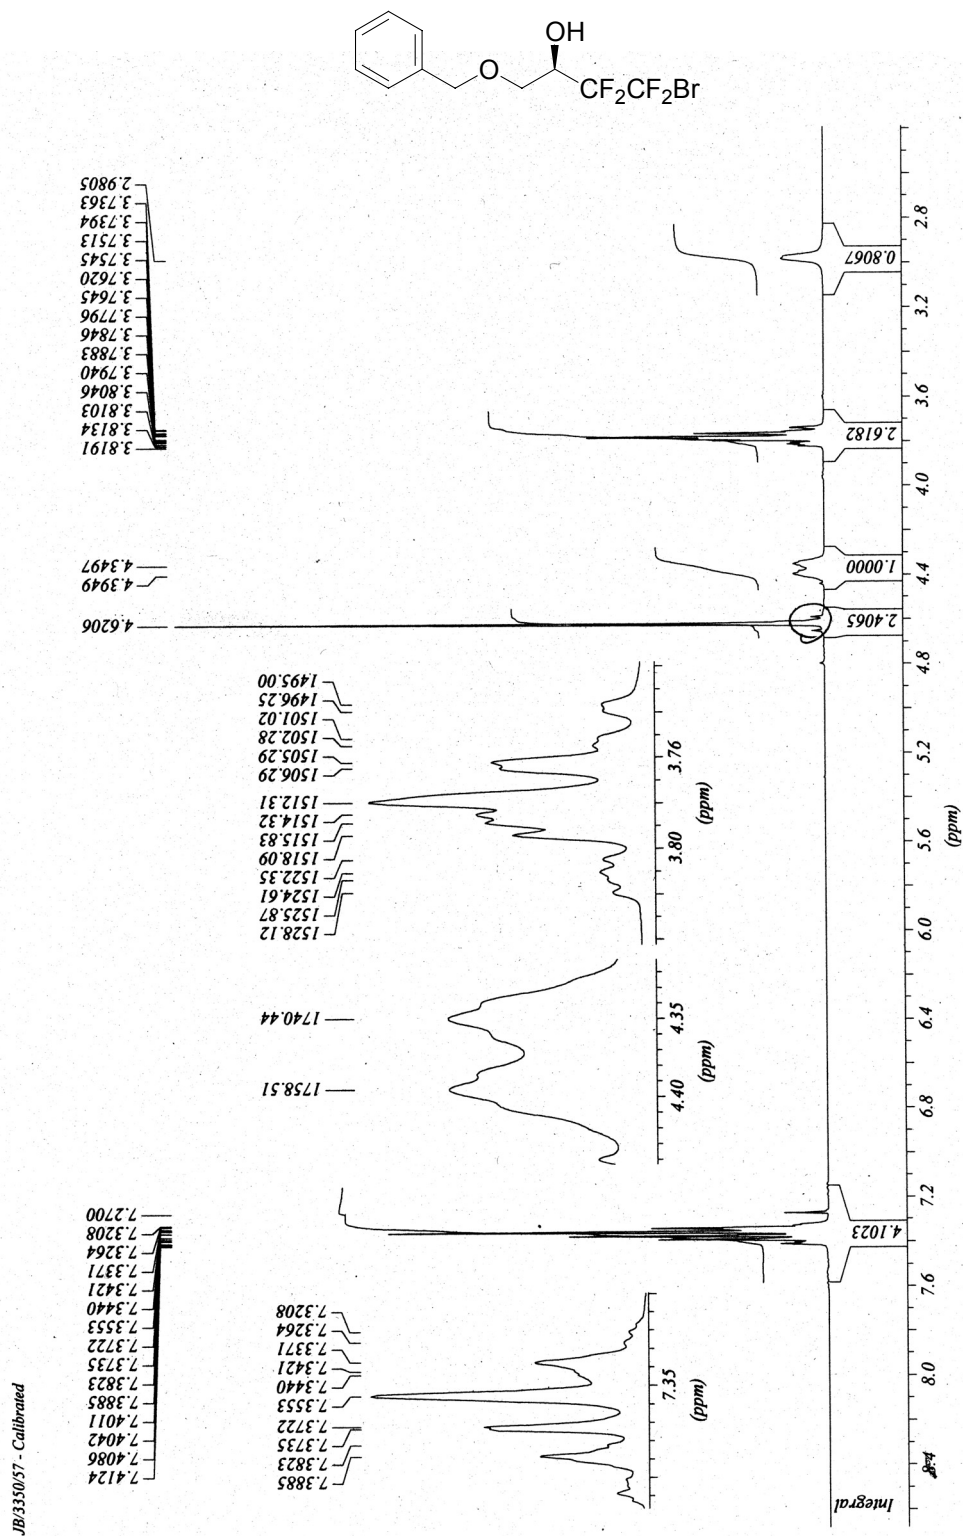

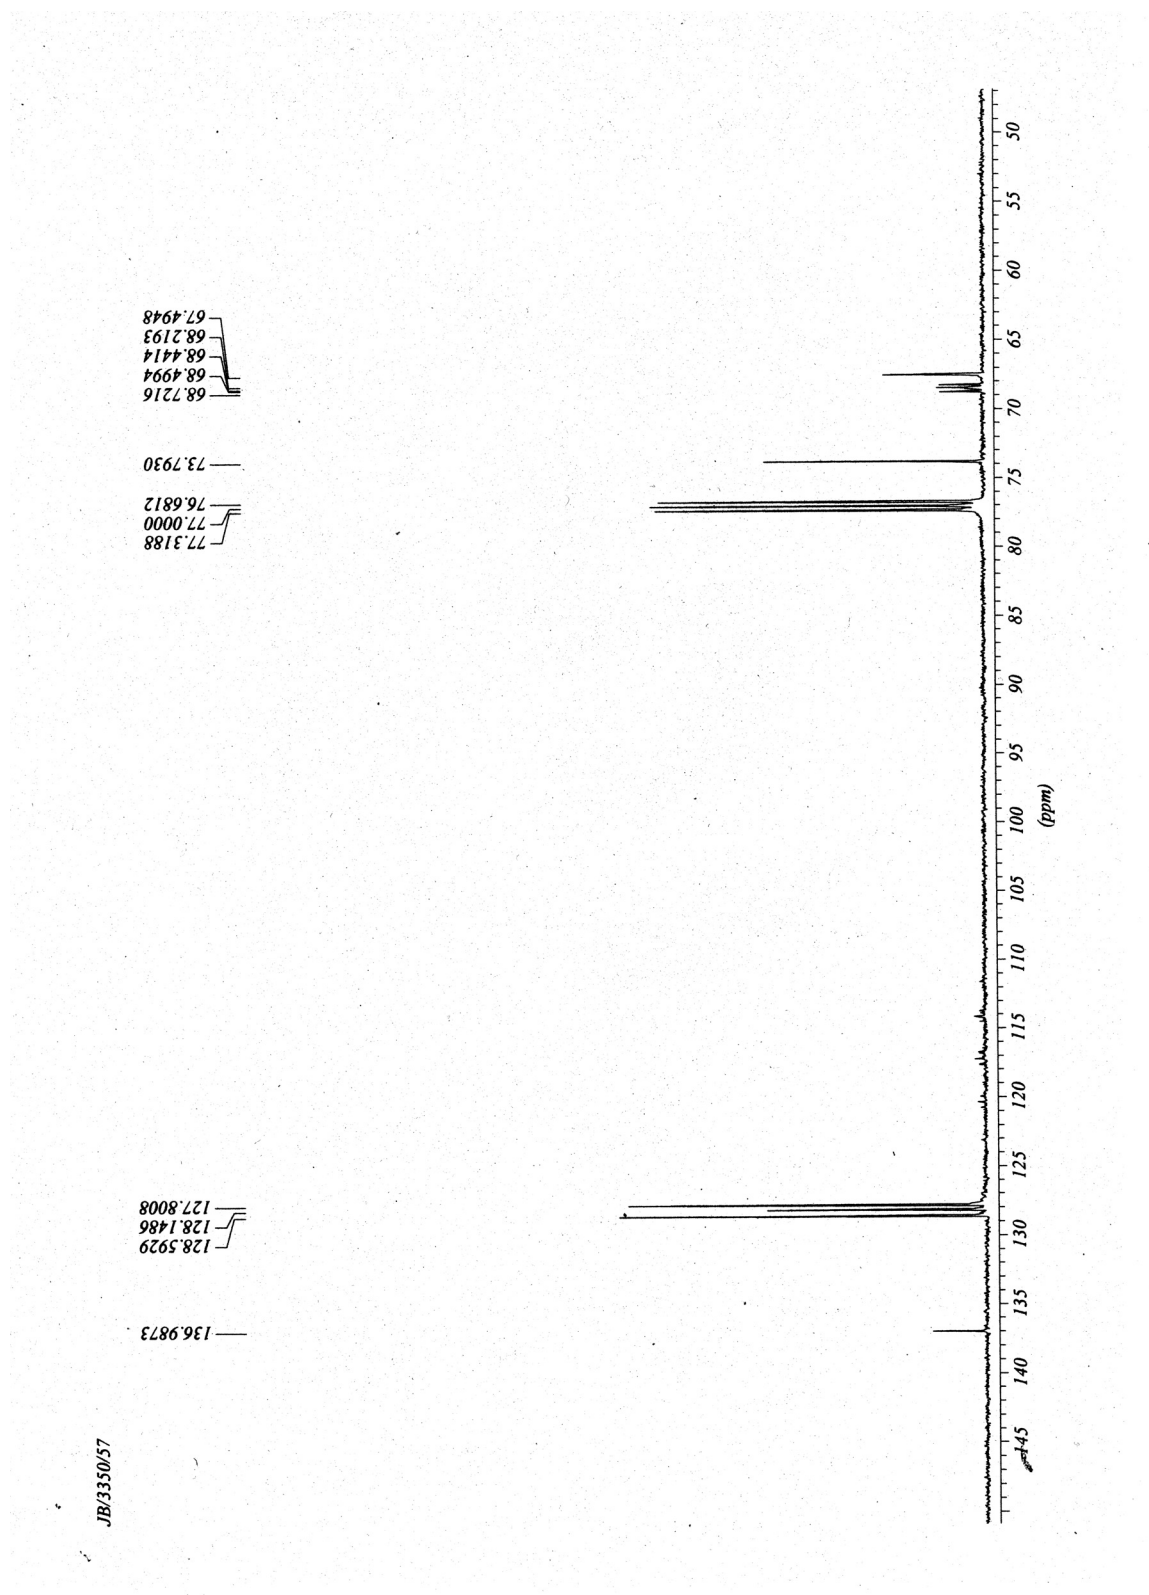



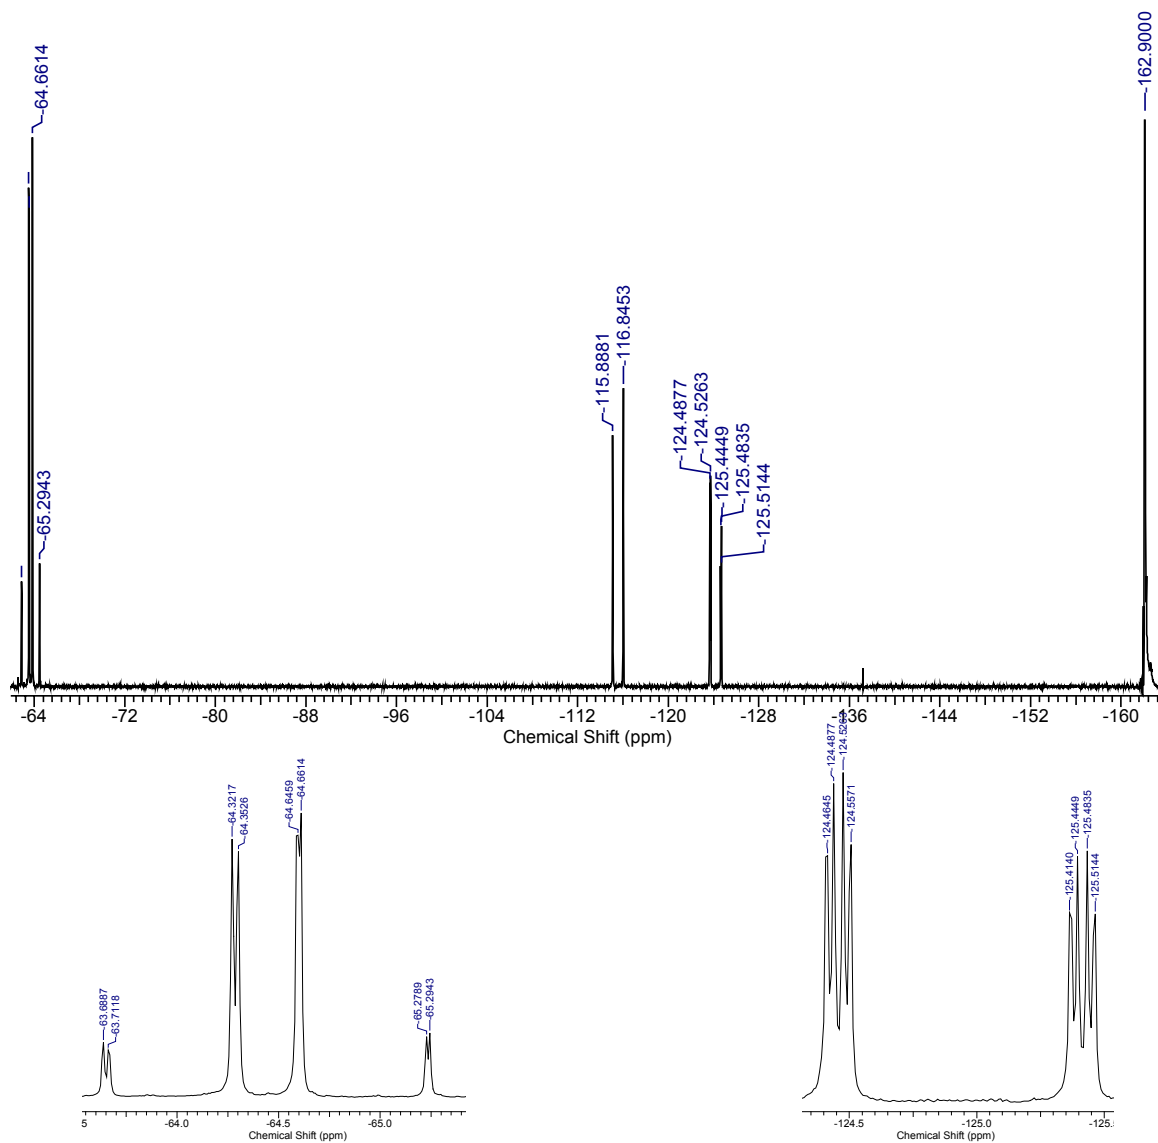

## (2R)-2-Benzyloxy-4-bromo-3,3,4,4-tetrafluorobutan-1-ol (11)

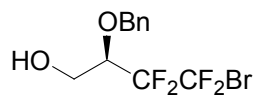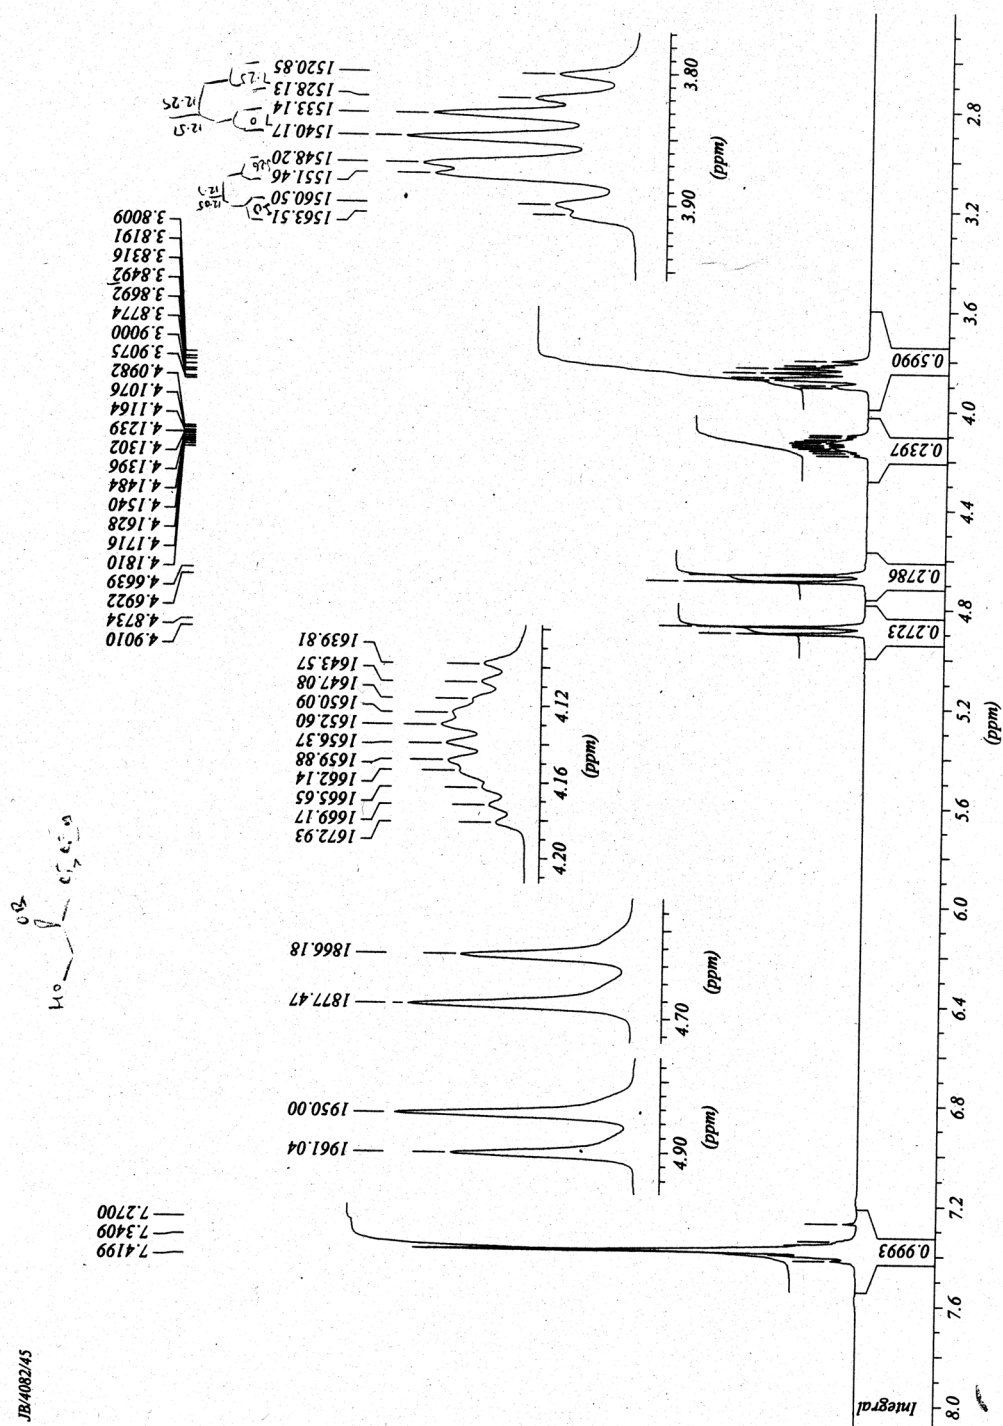

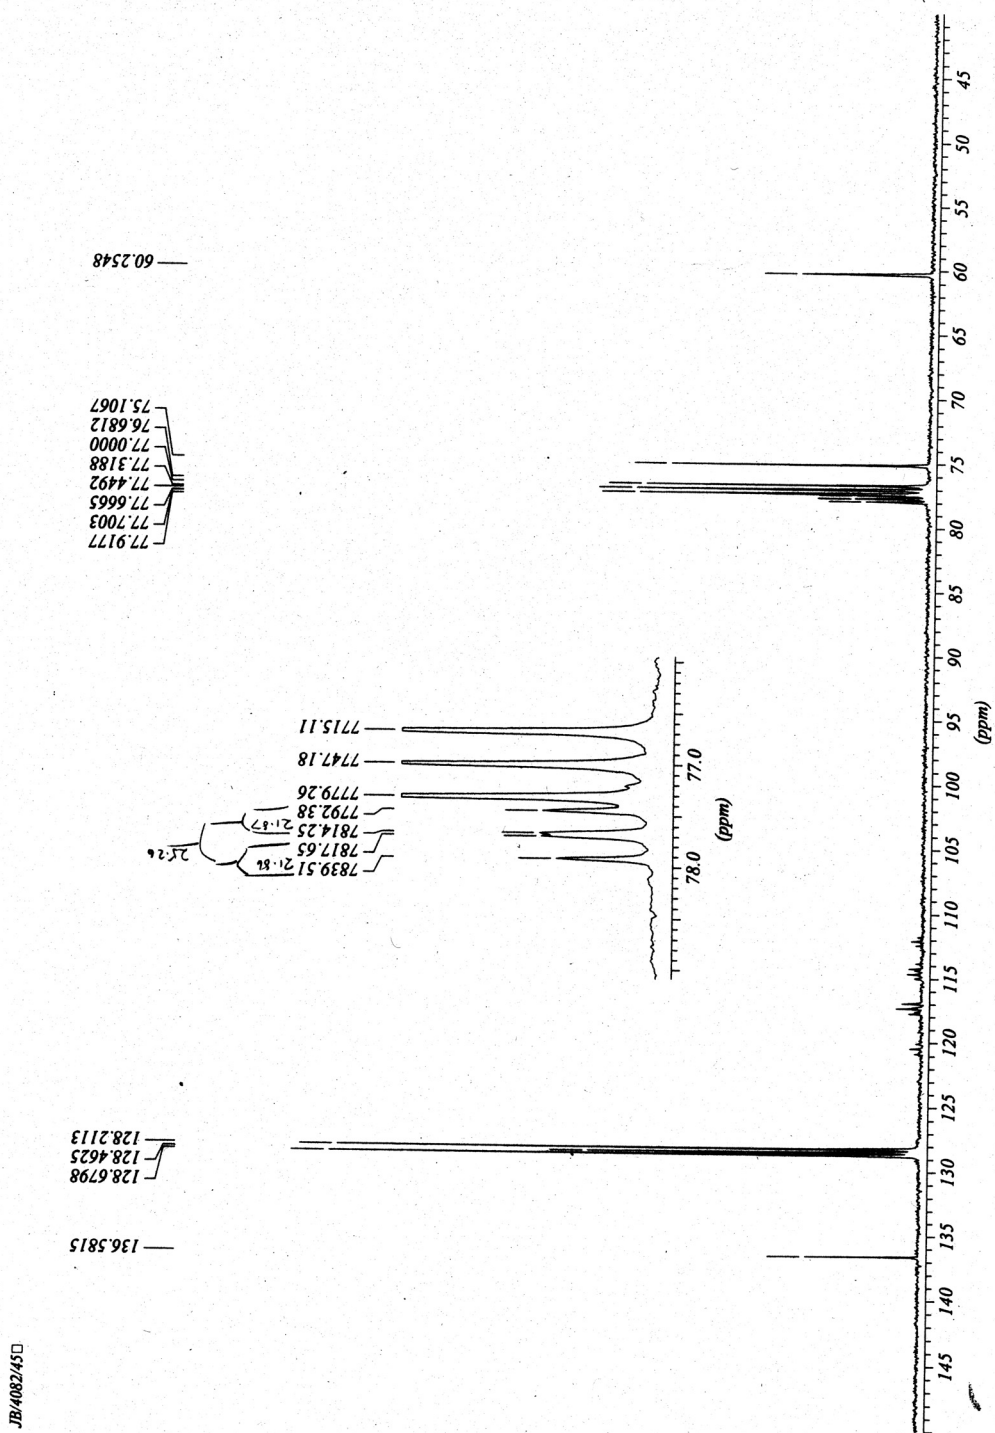

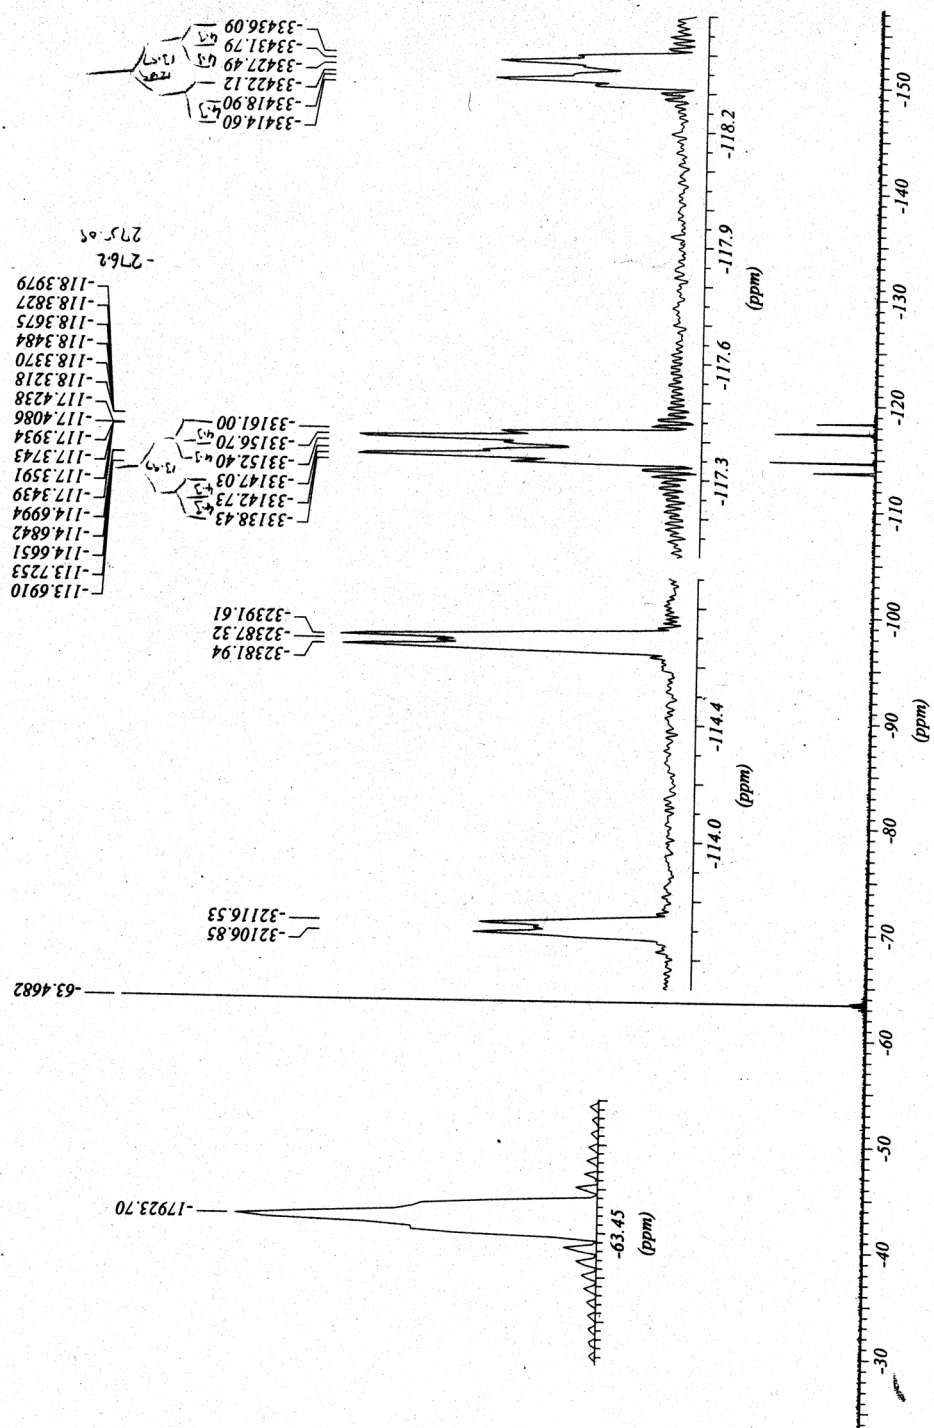

JB/4082/45C

**(2R)-4-bromo-1-(naphth-2-ylmethoxy)-3,3,4,4-tetrafluorobutan-1-ol (20)**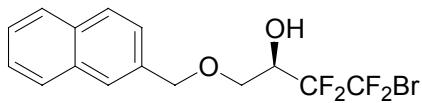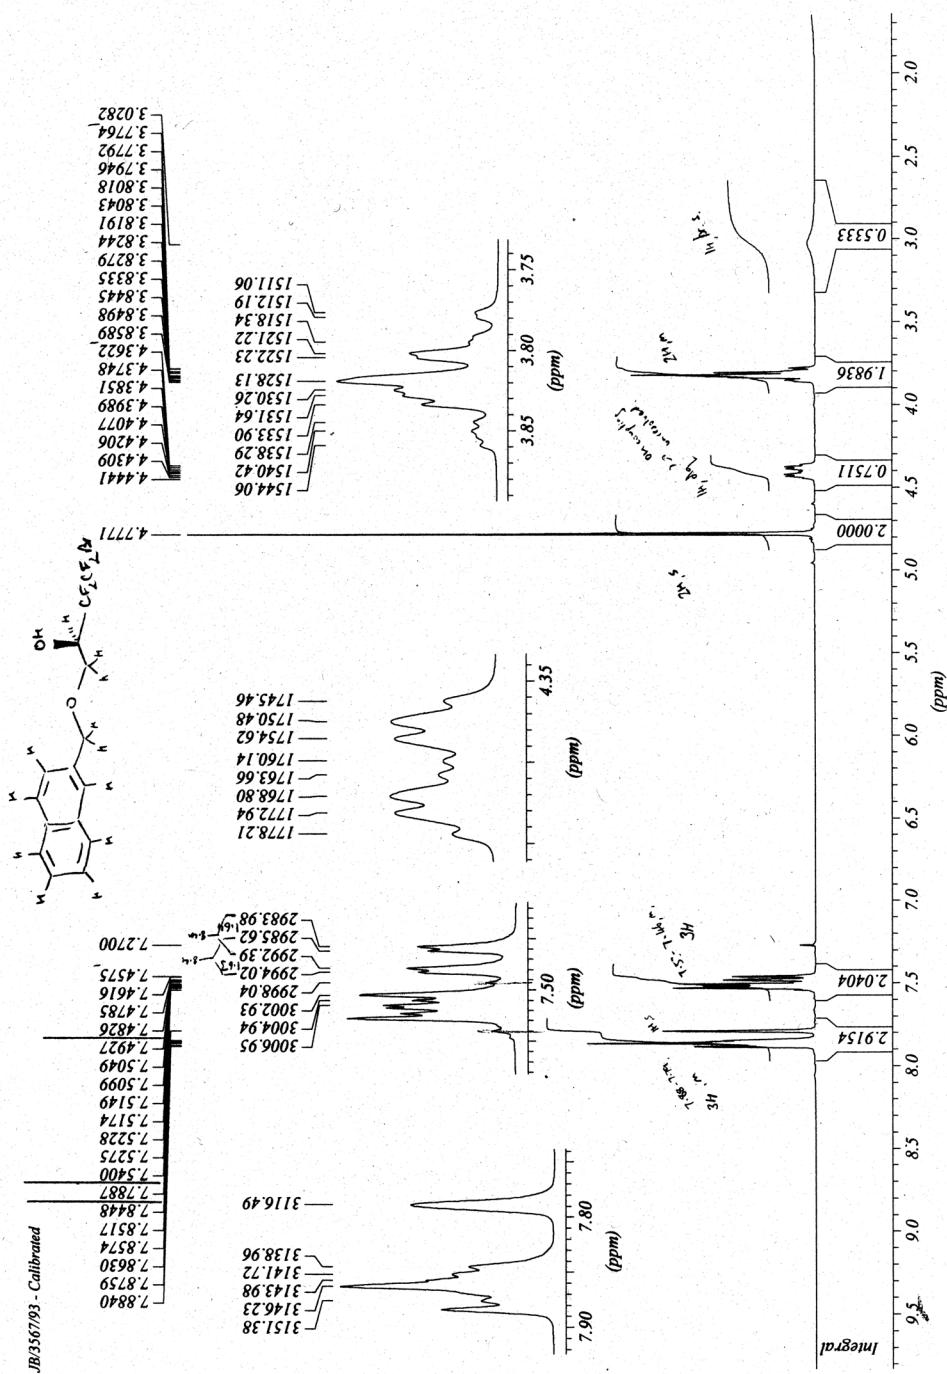

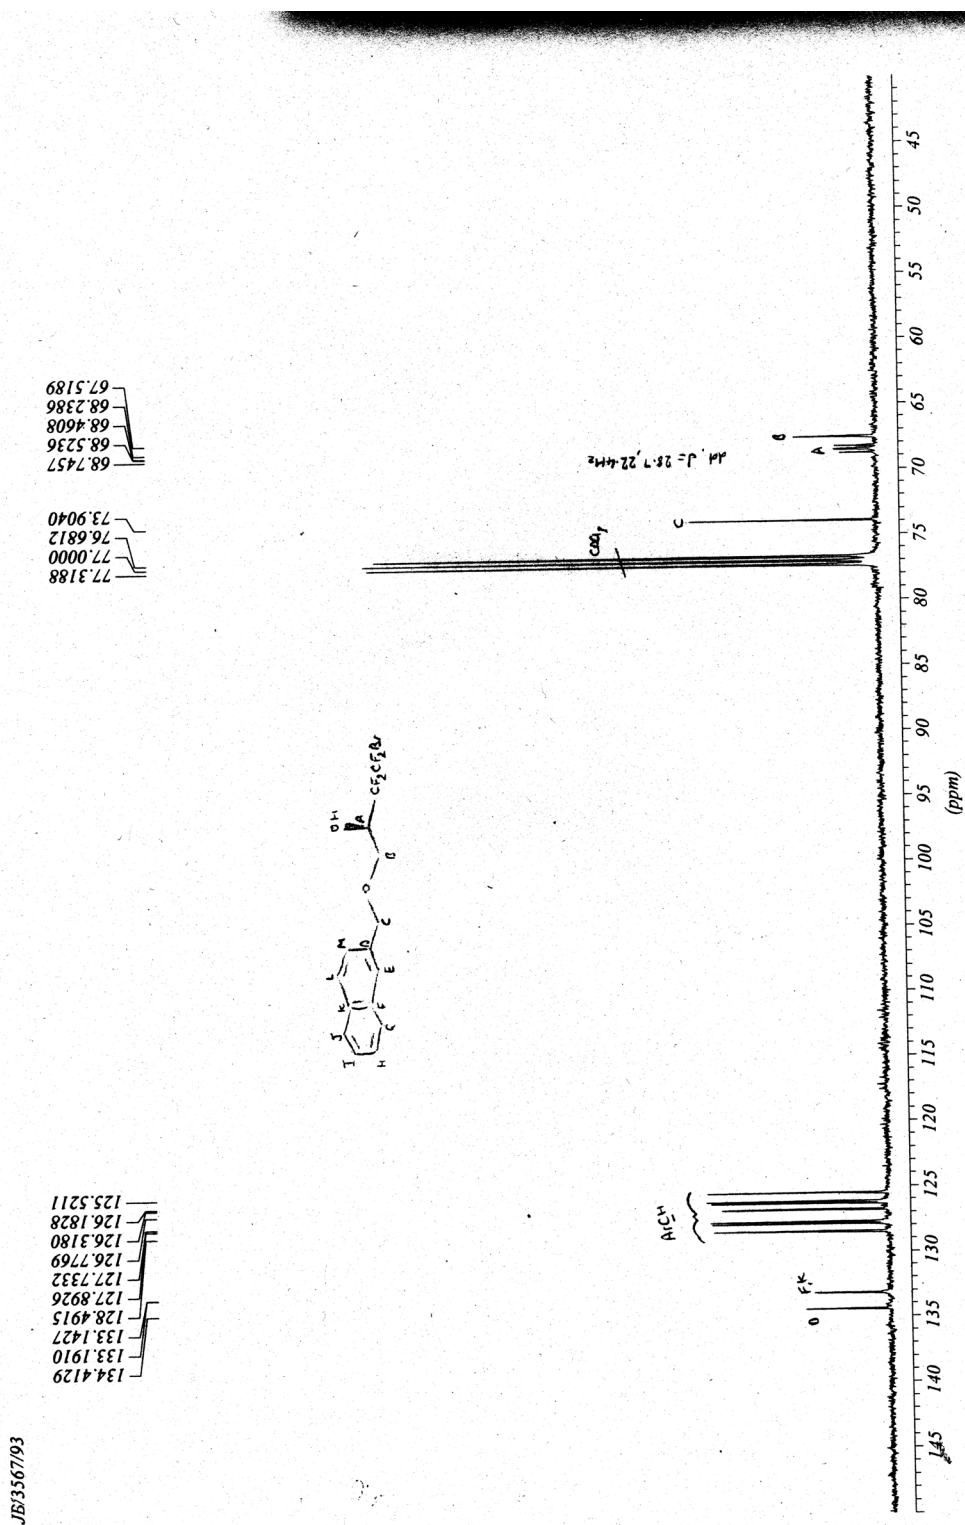

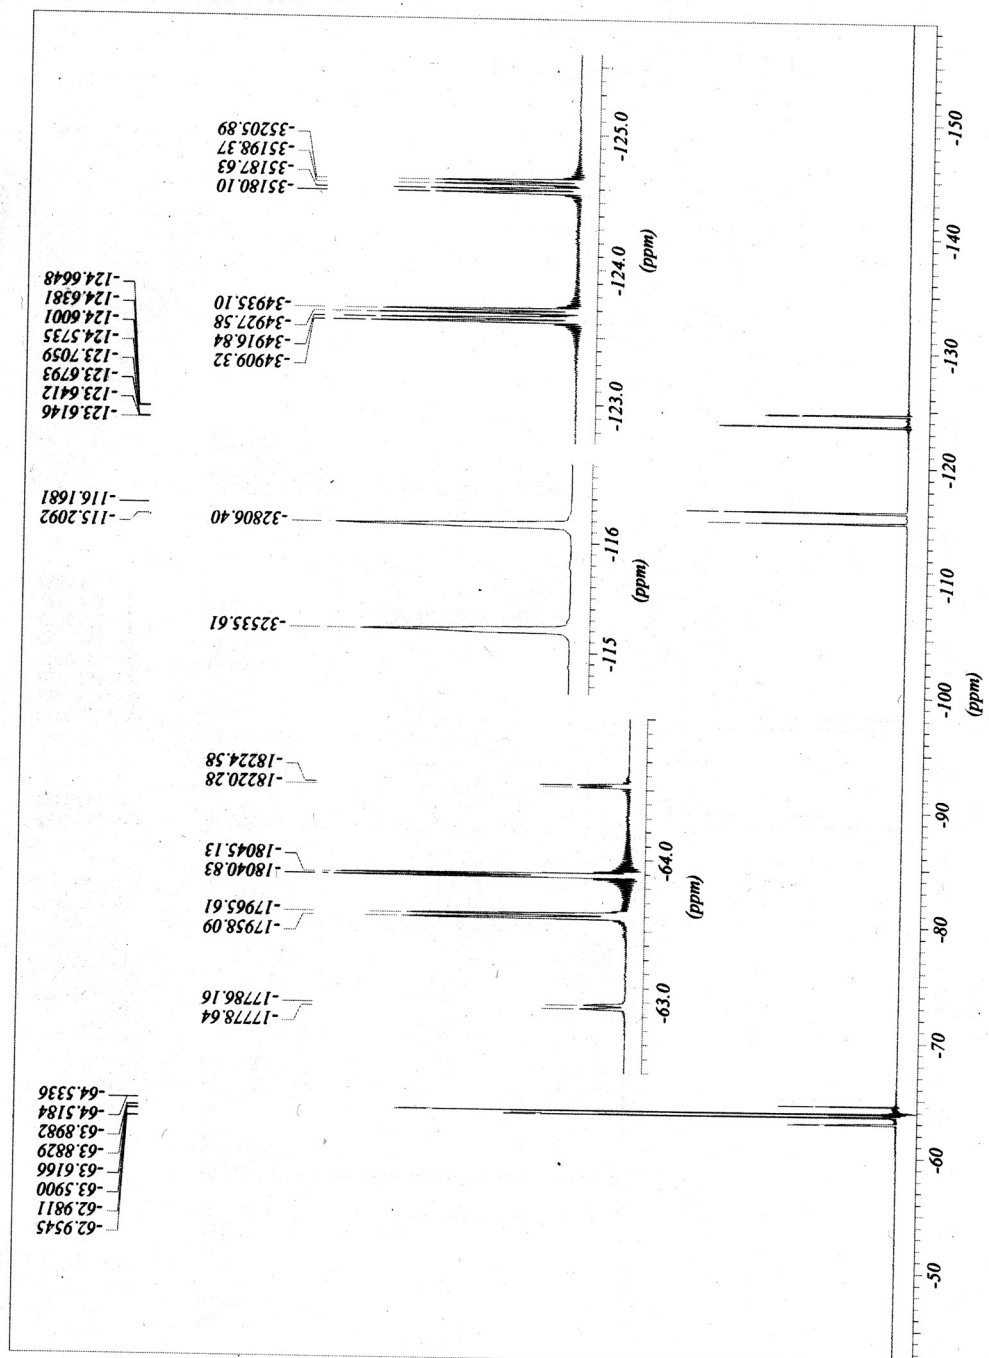

**(2S)-[(2R)-4-bromo-1-(2-naphthylmethyl)-3,3,4,4-tetrafluorobut-2-yl]-2-(6-methoxy-2-naphthyl) propanoate (21)**

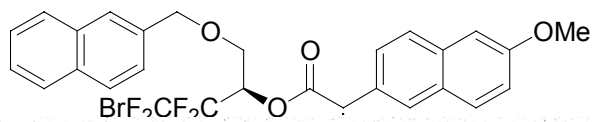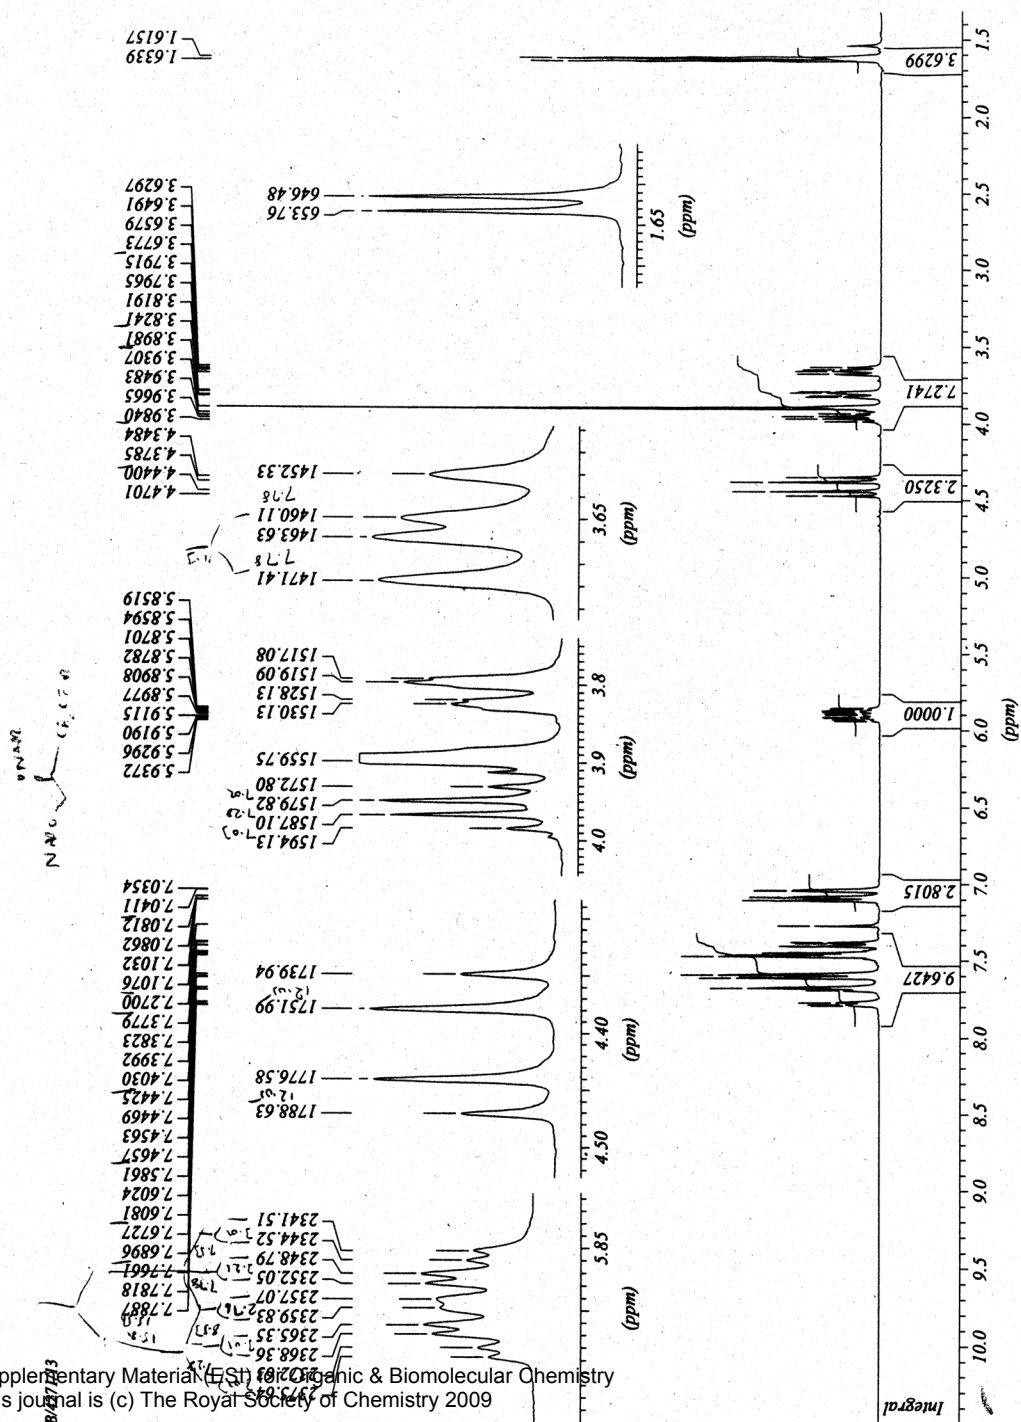



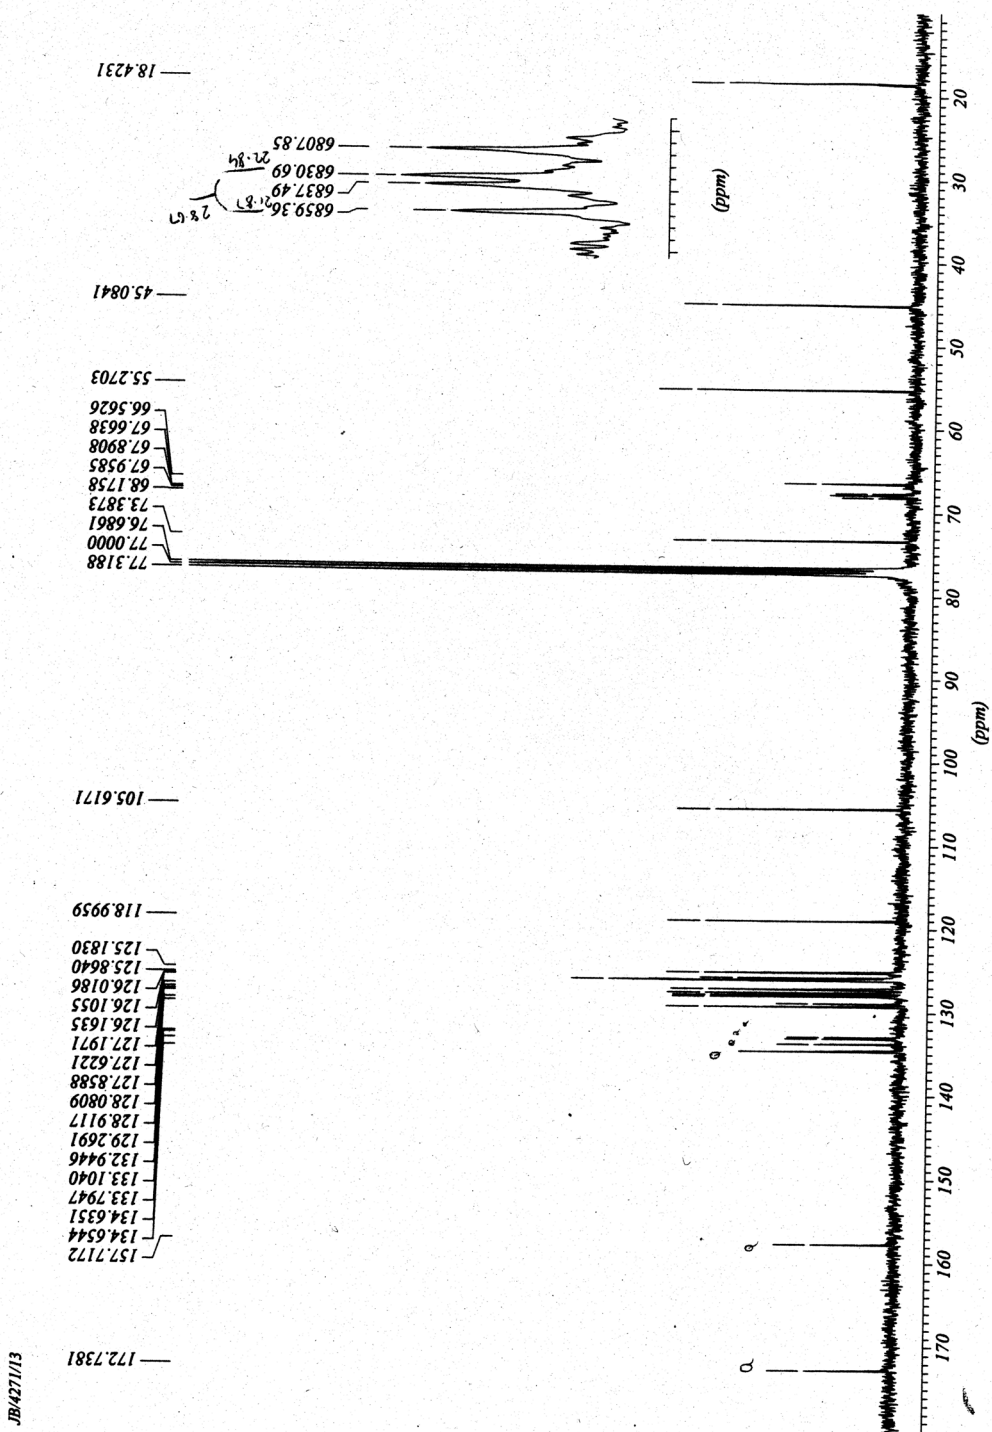

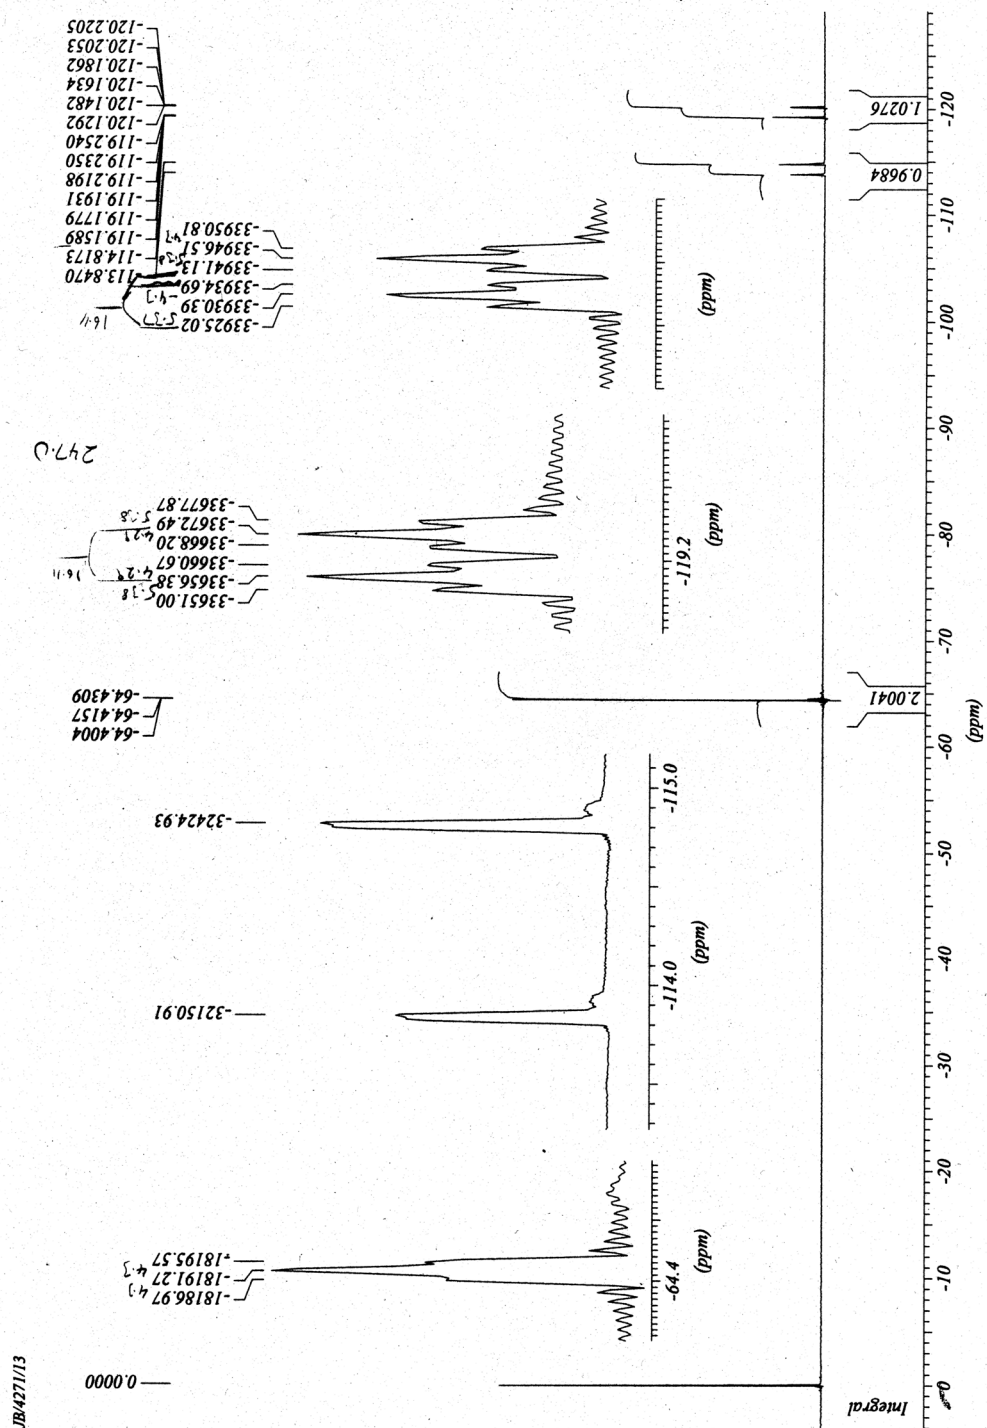

**(2*S*)-[(2*R*)-4-bromo-1-(2-benzyl)-3,3,4,4-tetrafluorobut-2-yl]-2-(6-methoxy-2-naphthyl)propanoate (22)**

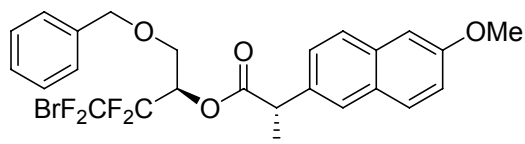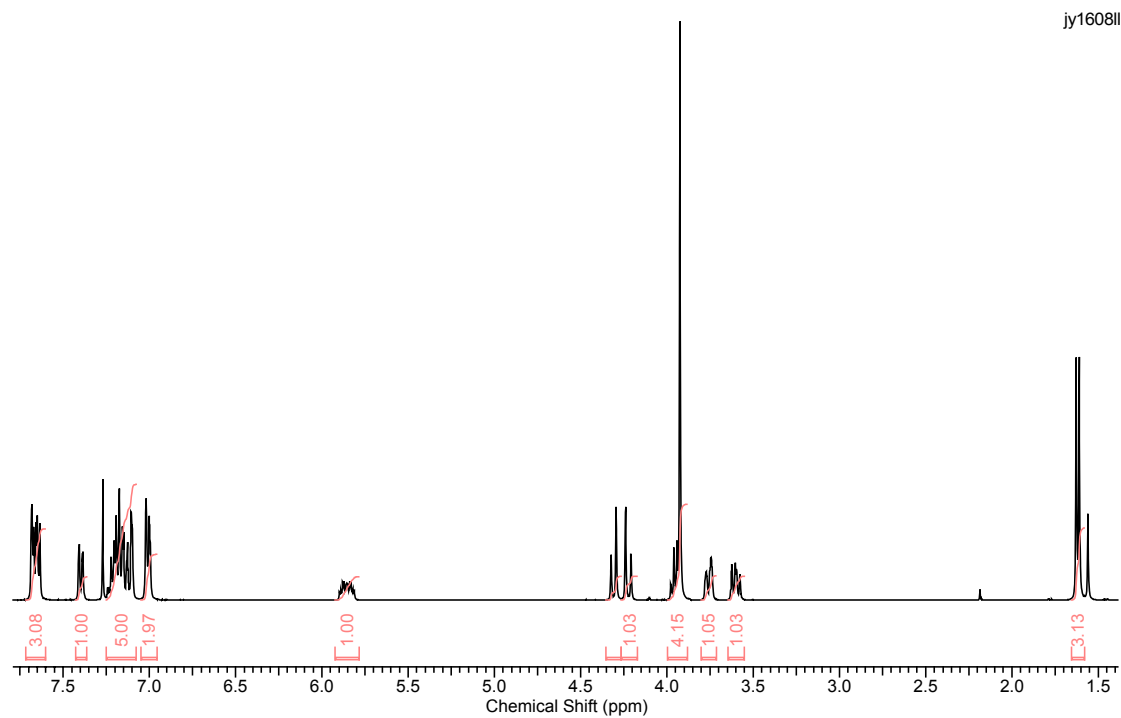

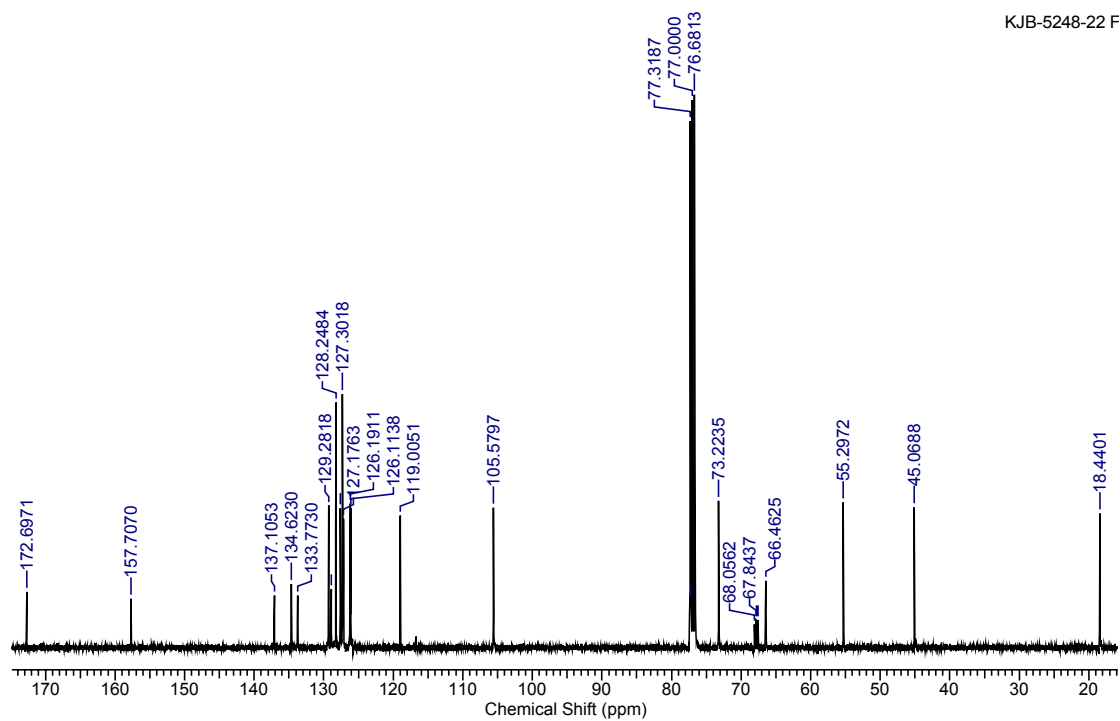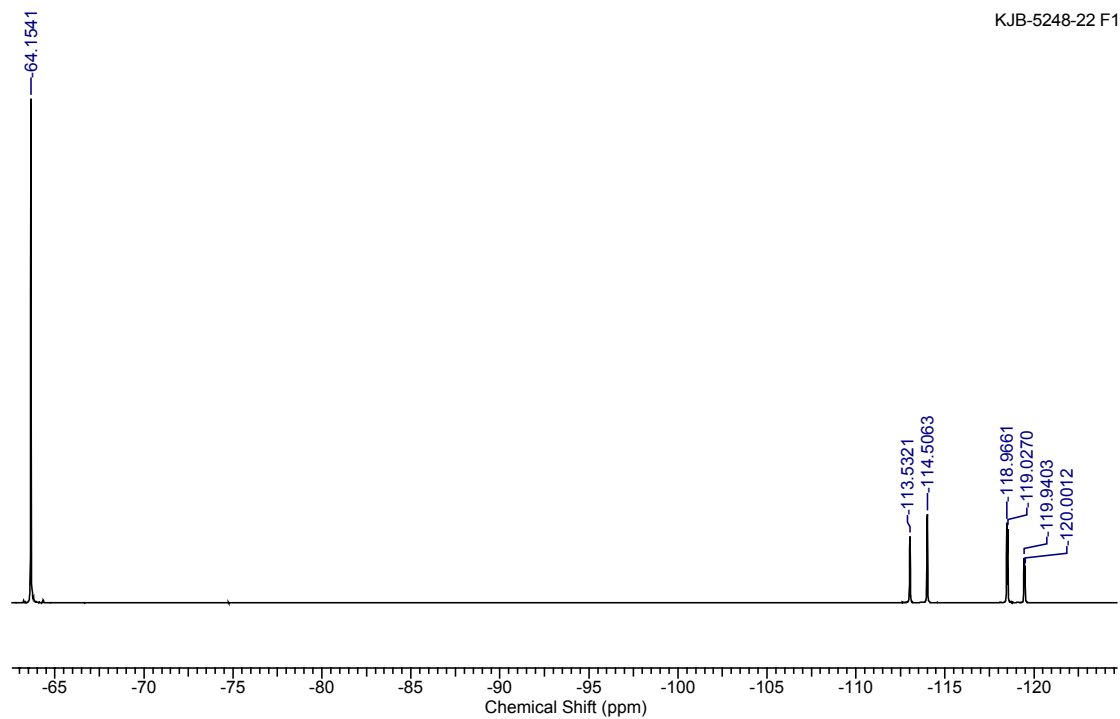

**(2R)-1-tert-Butyldimethylsilyloxy-4-bromo-3,3,4,4-tetrafluorobutan-2-ol (24)**

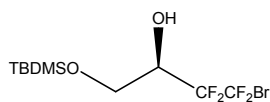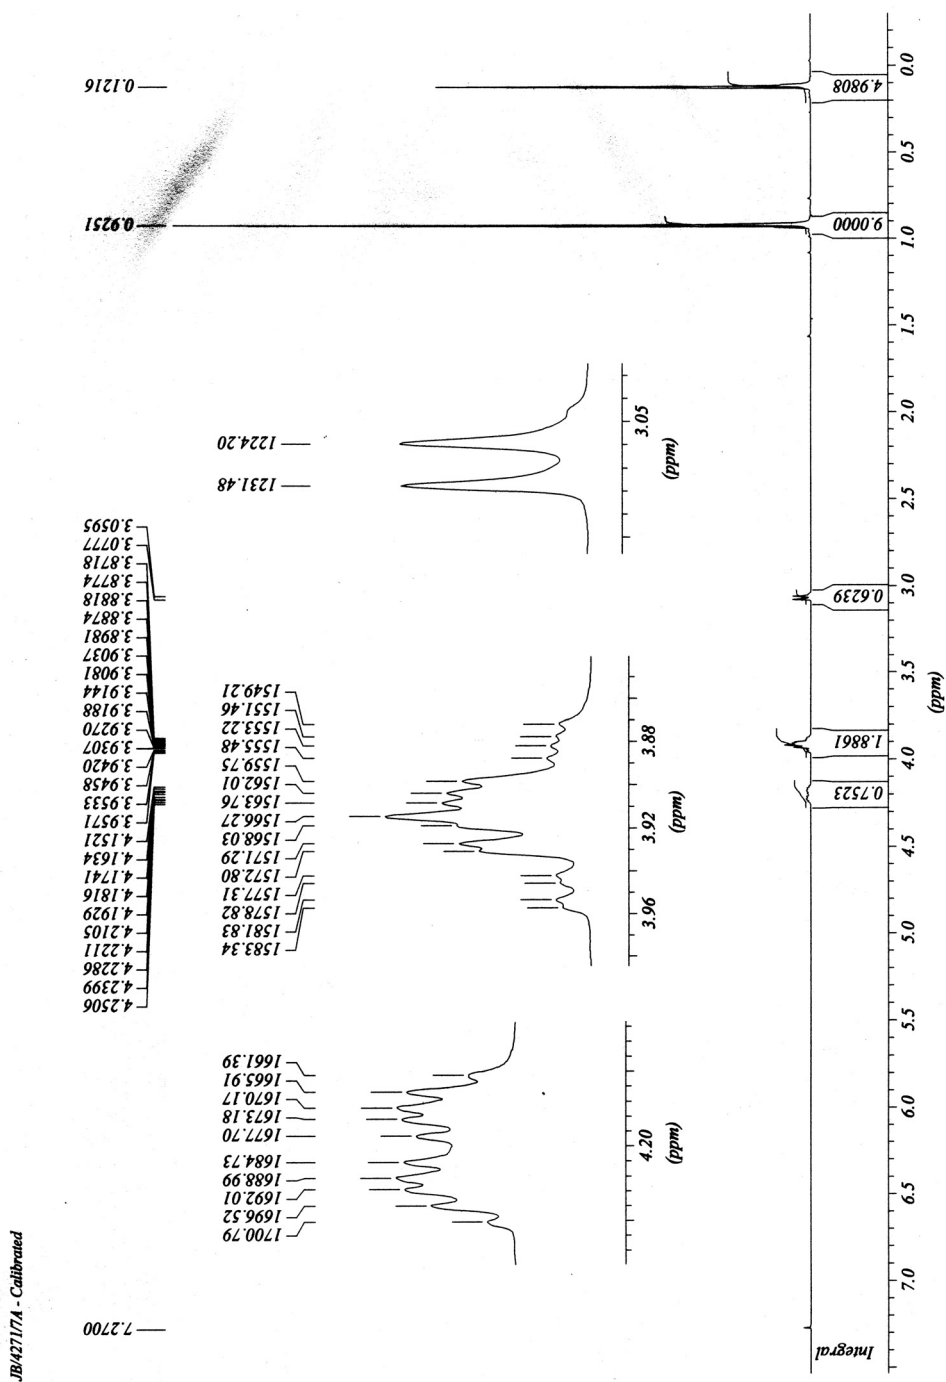

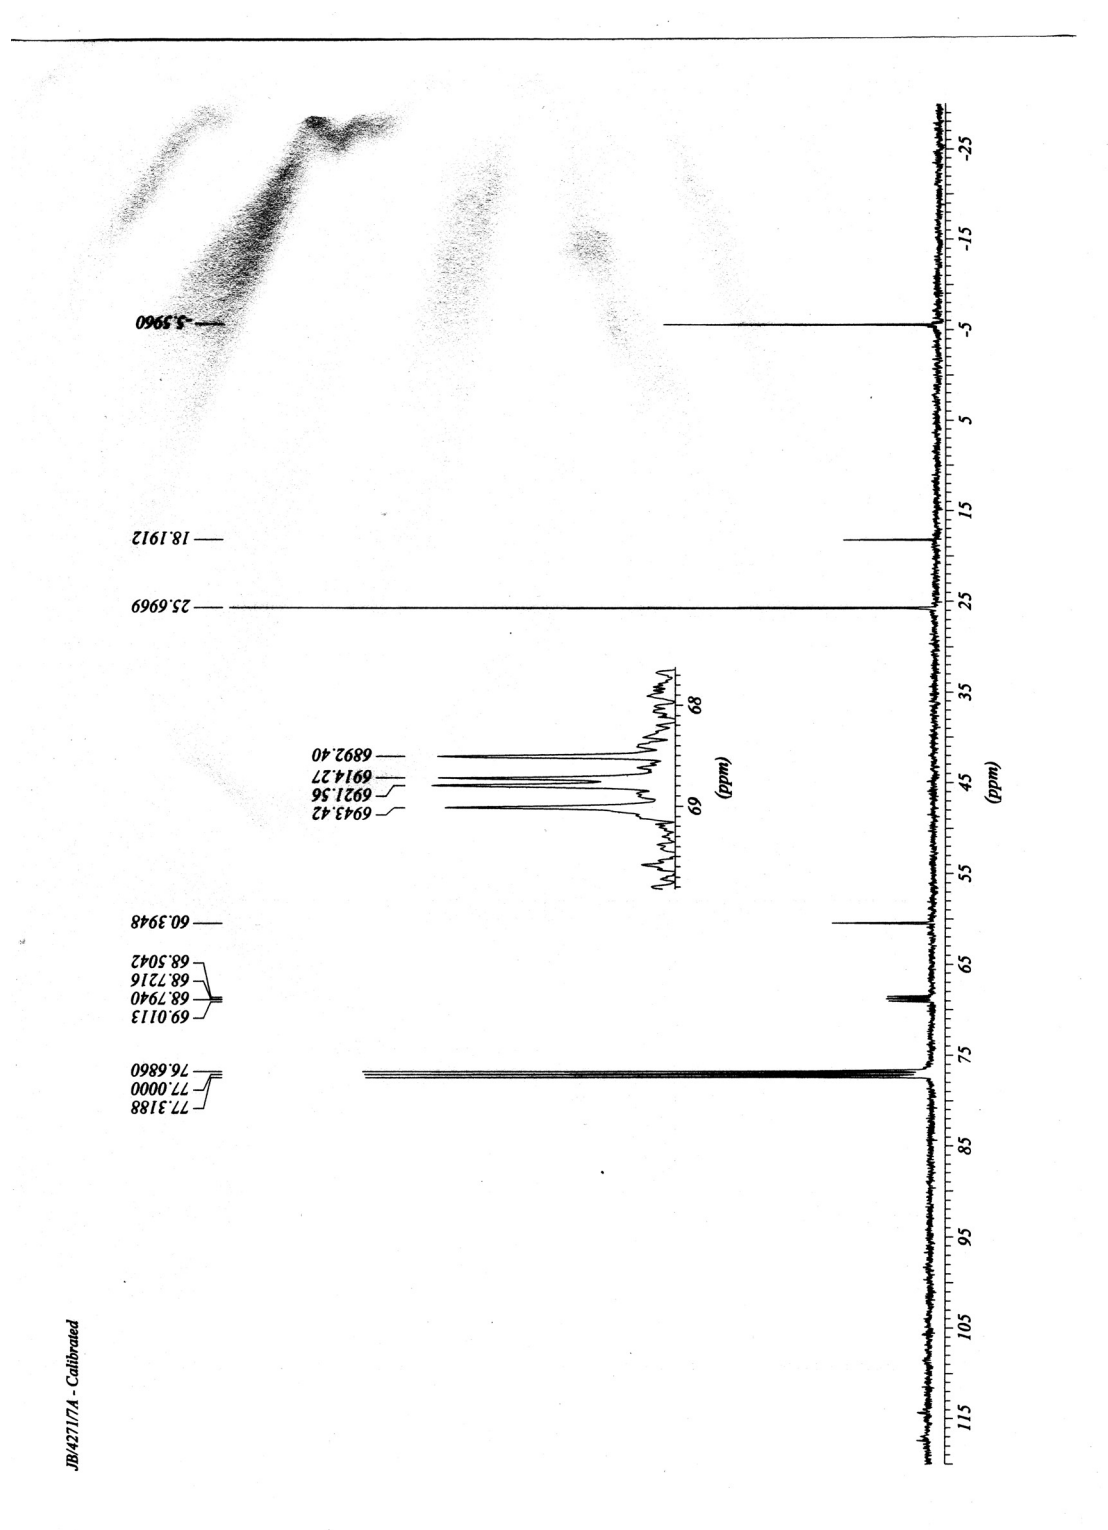

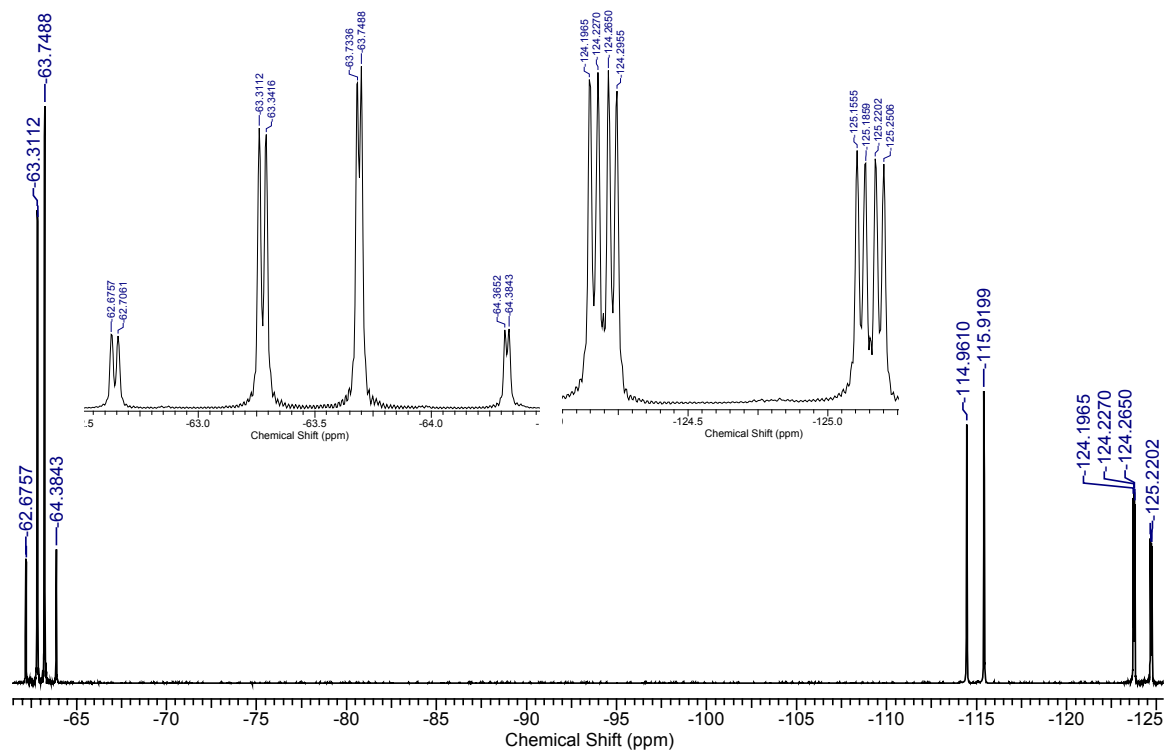

**(2R)-4-bromo-2-hydroxy-3,3,4,4-tetrafluorobut-1-yl)-2,2-dimethyl propanoate (25)**

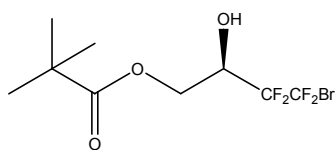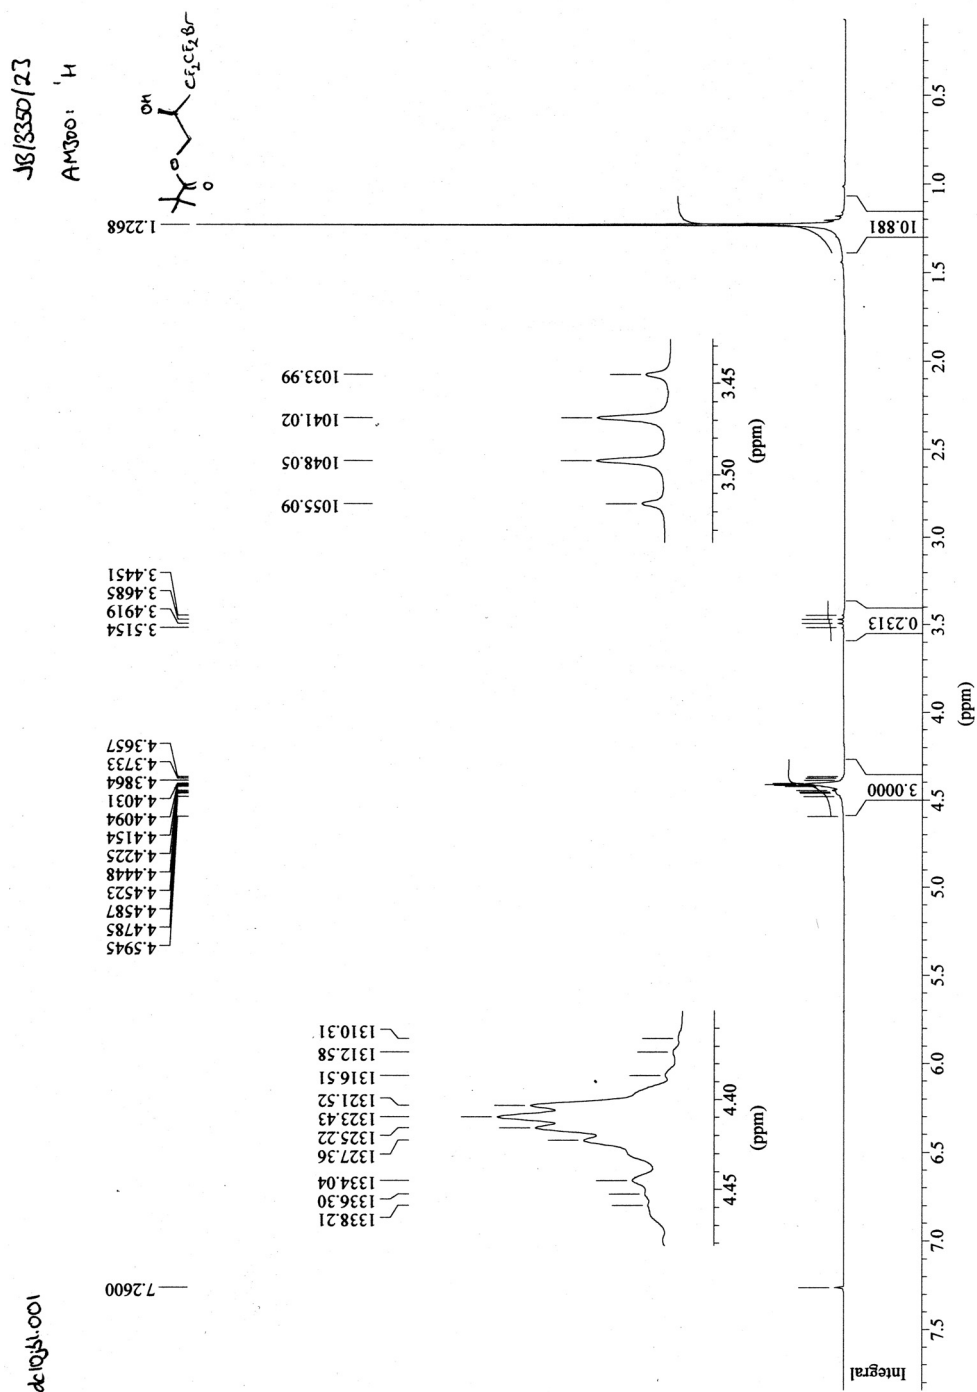



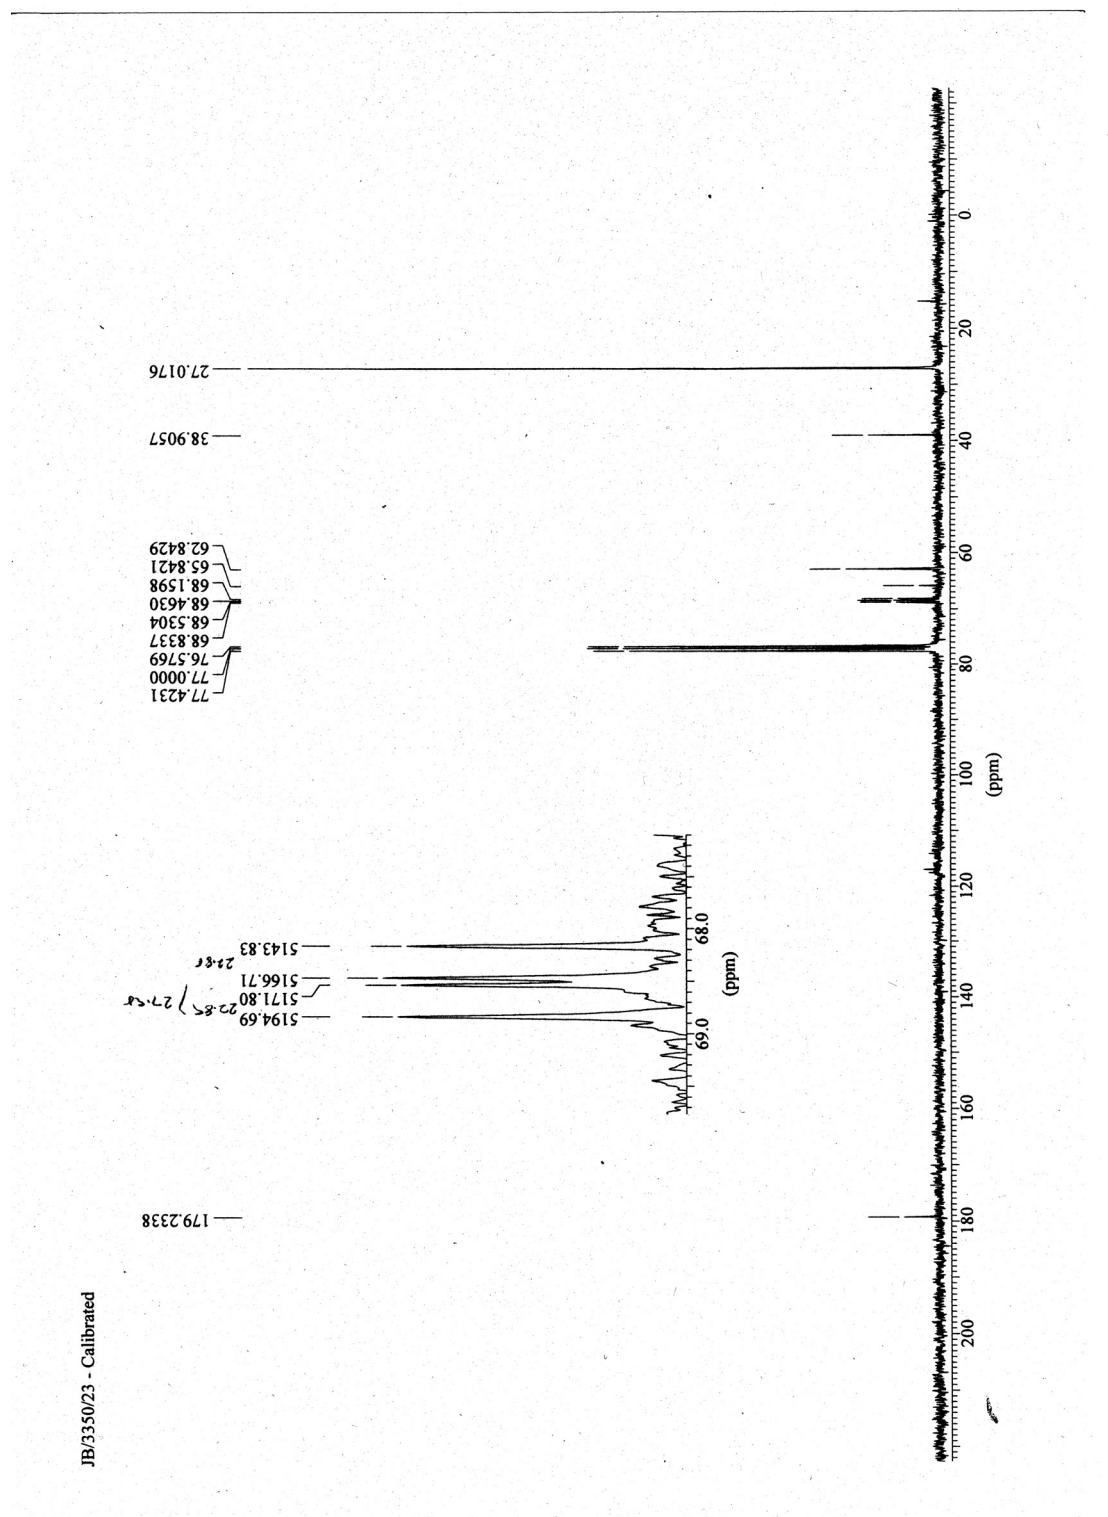

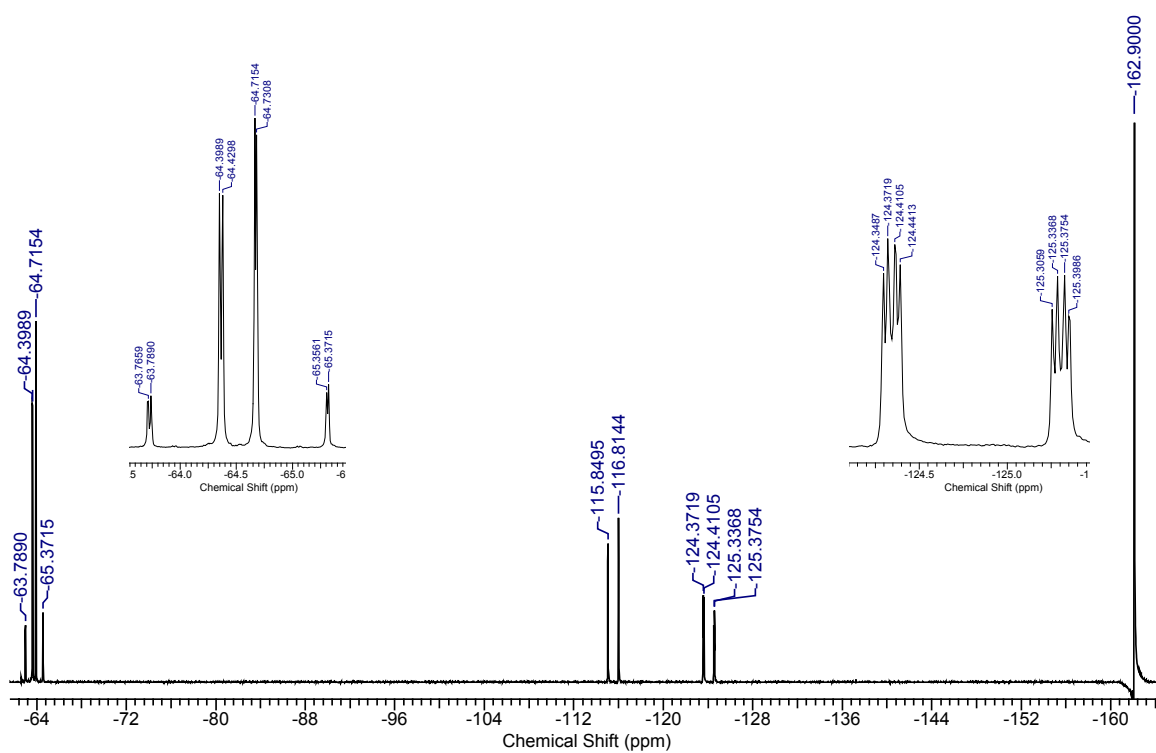

## (2R)-(1-benzyloxy-4-bromo-3,3,4,4-tetrafluoro)but-2-yl formate (27)

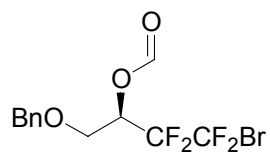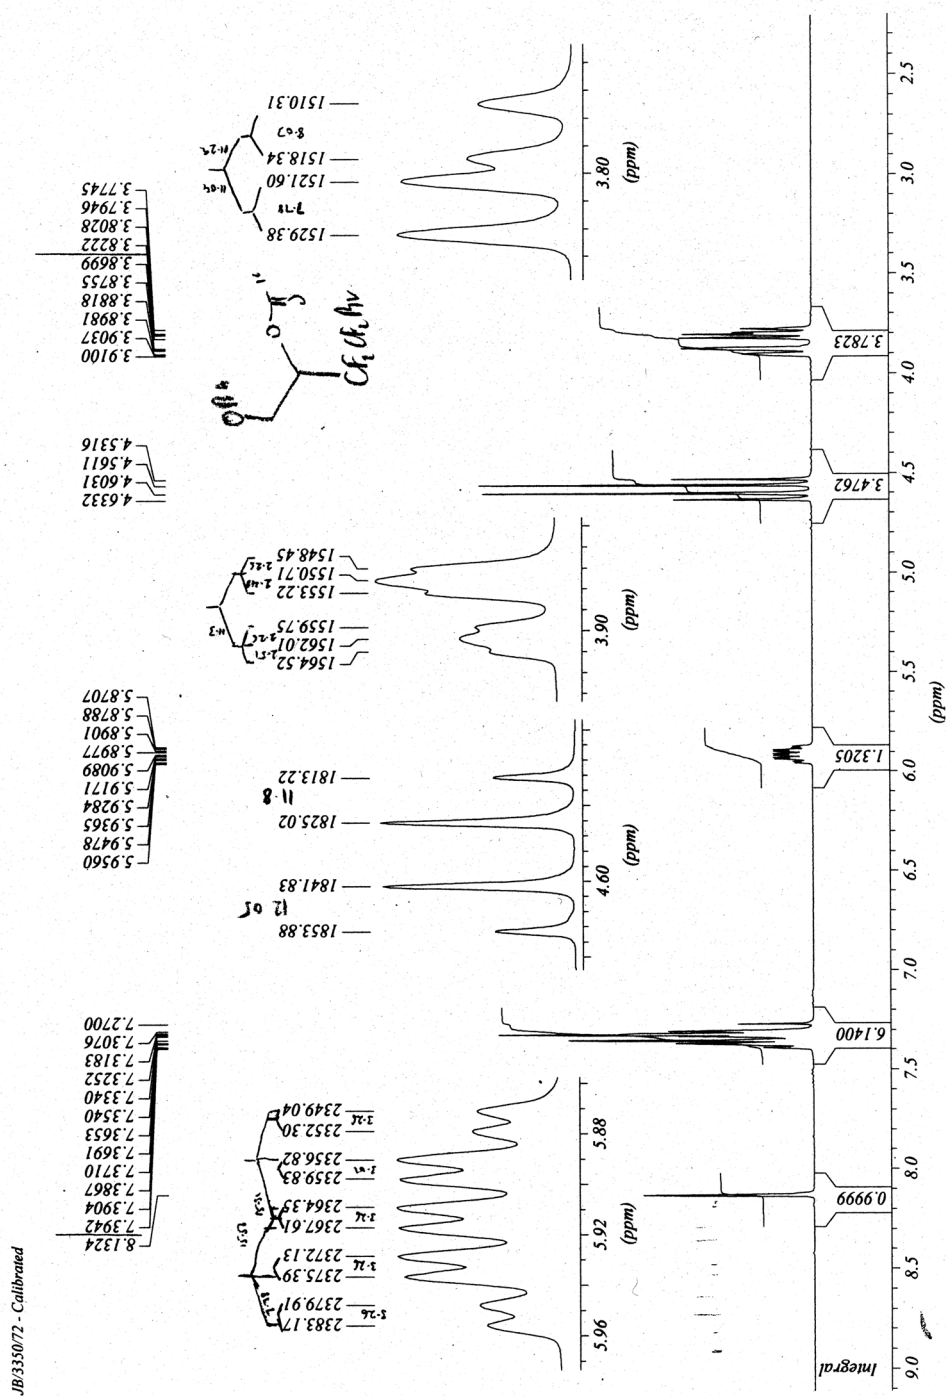

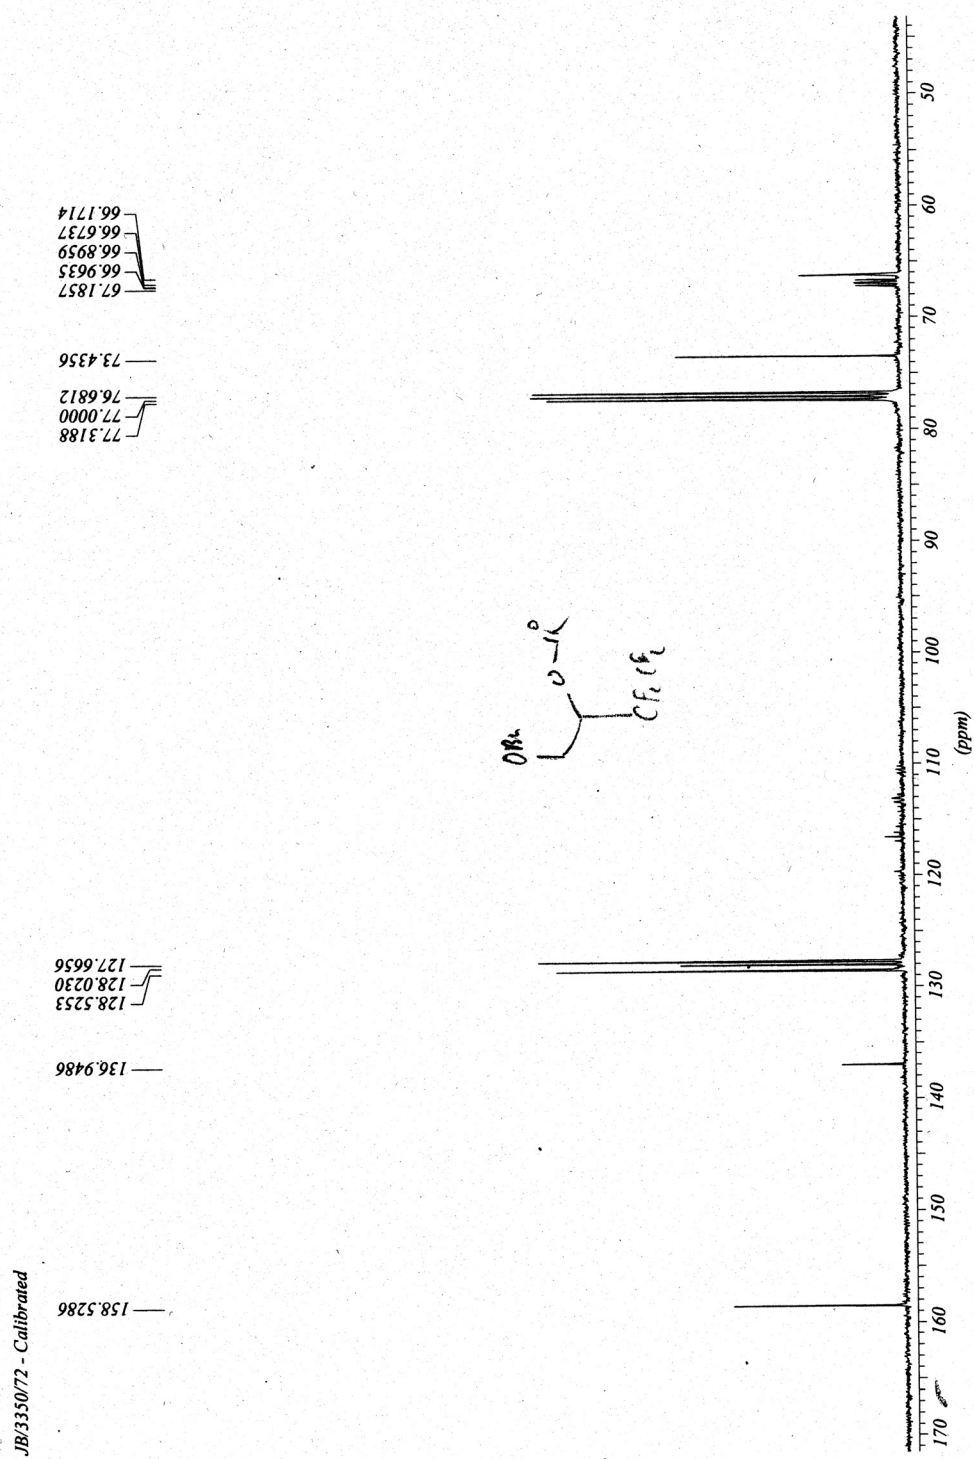

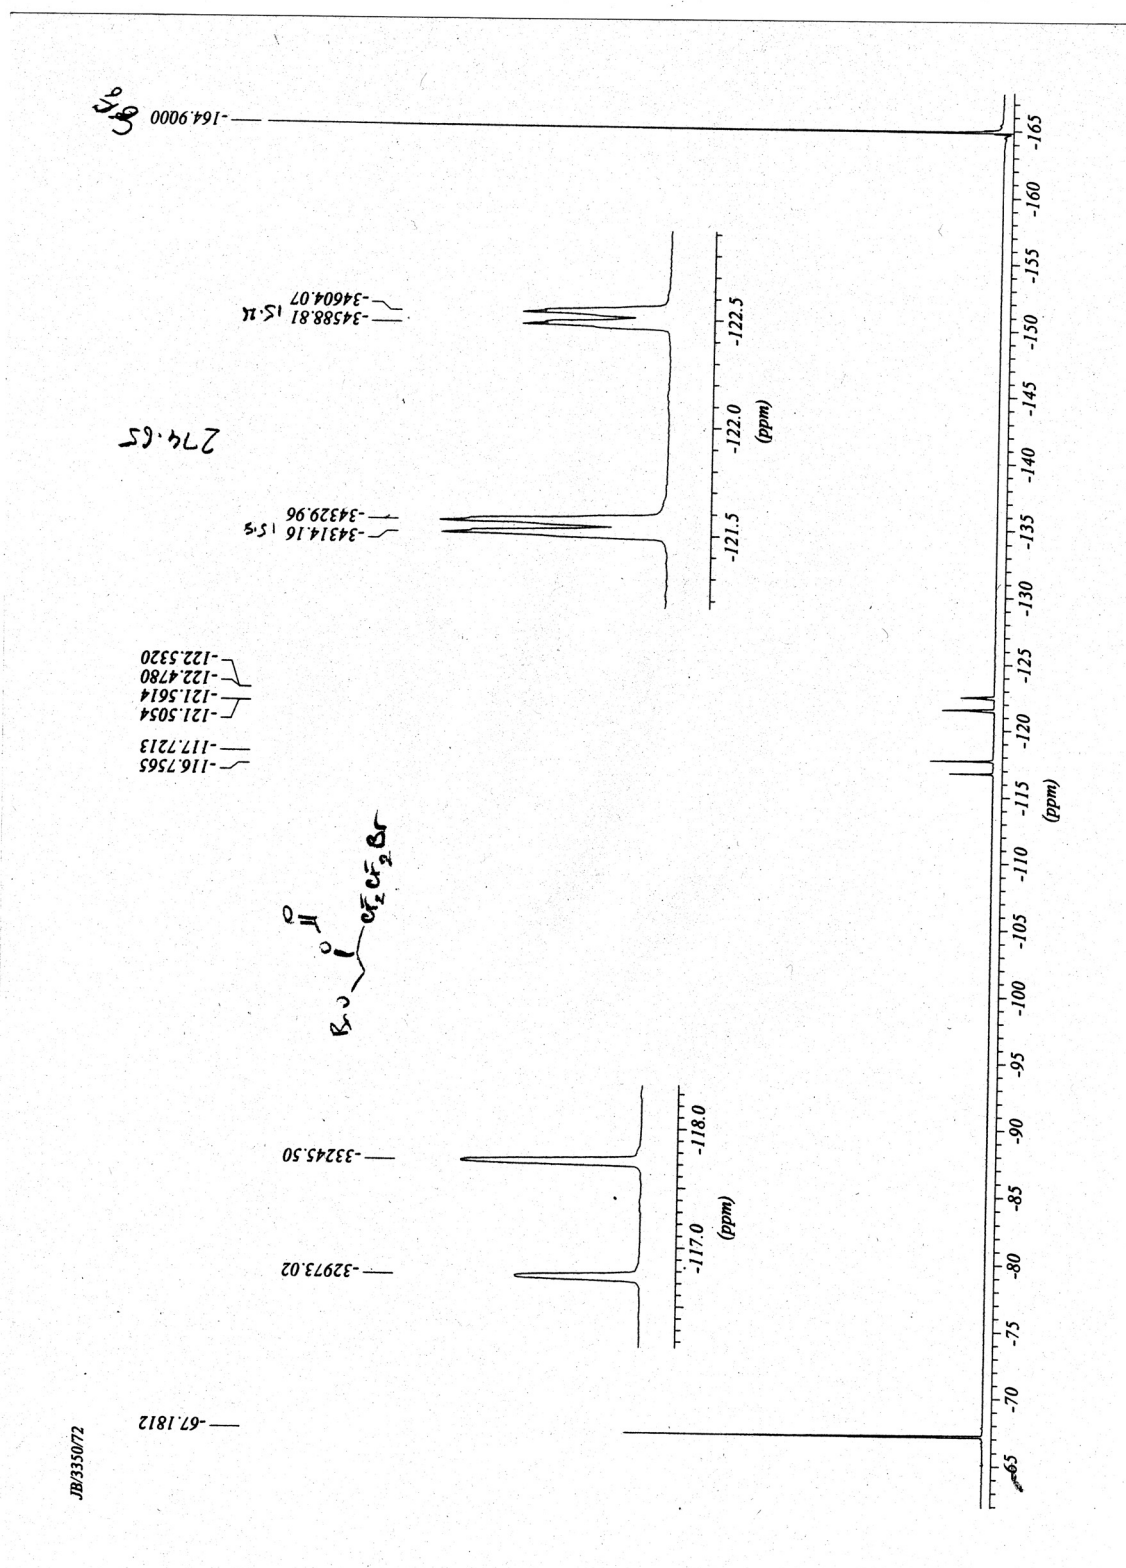

**(2R)-(1-benzyloxy-4-bromo-3,3,4,4-tetrafluoro)but-2-yl benzyloxyethanoate (32)**

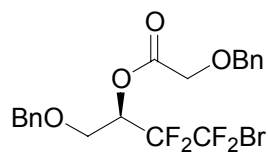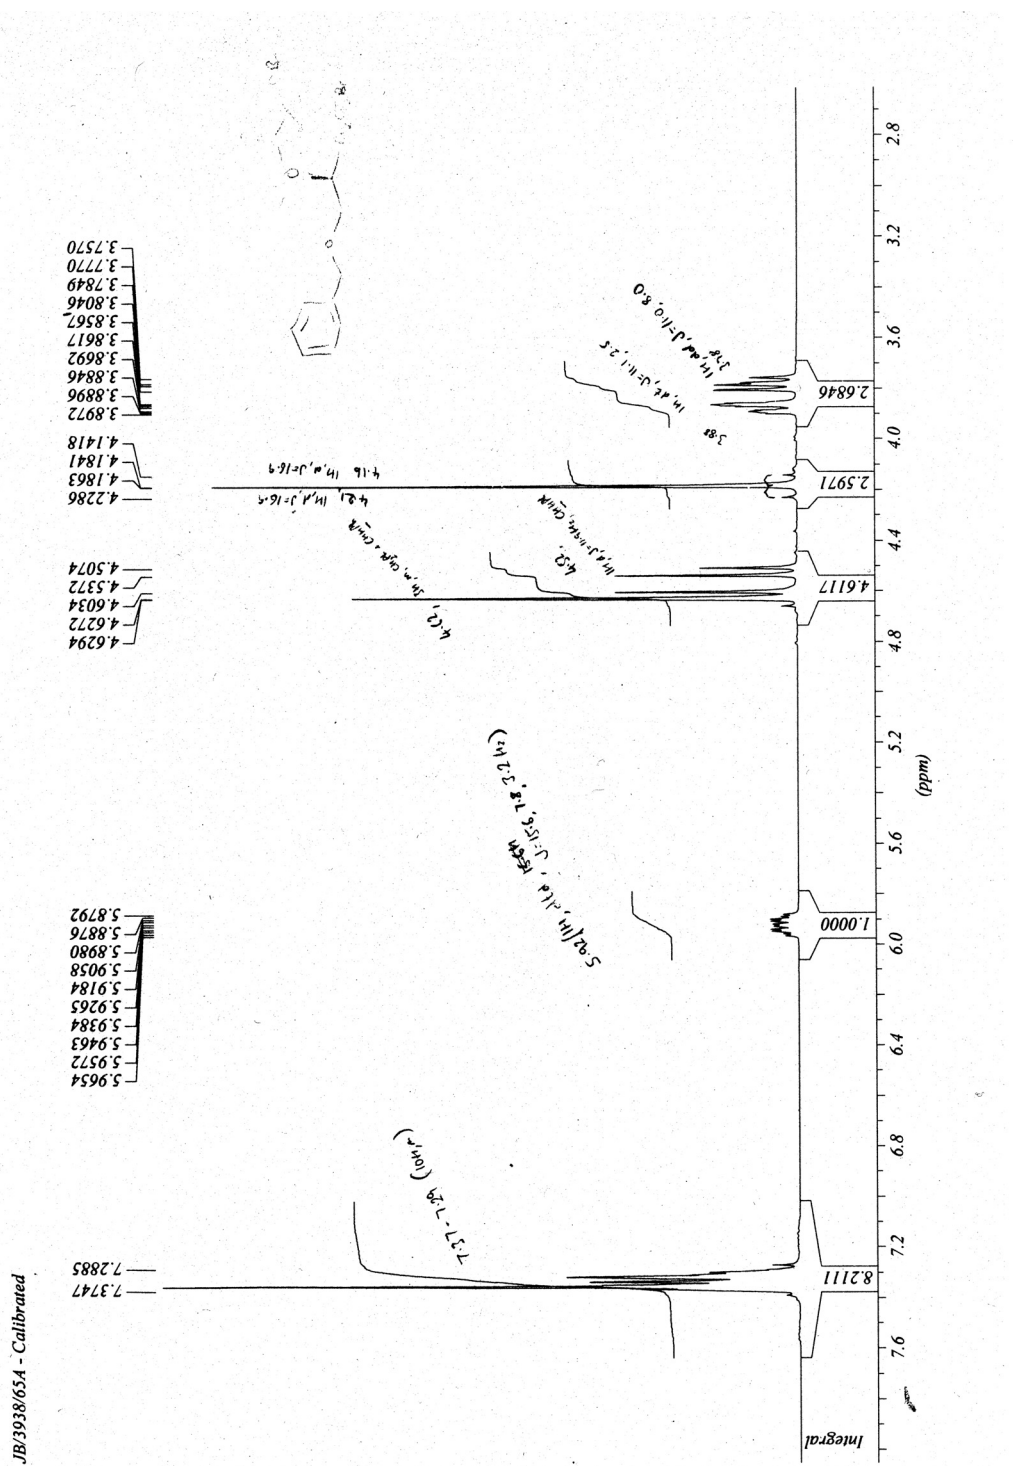

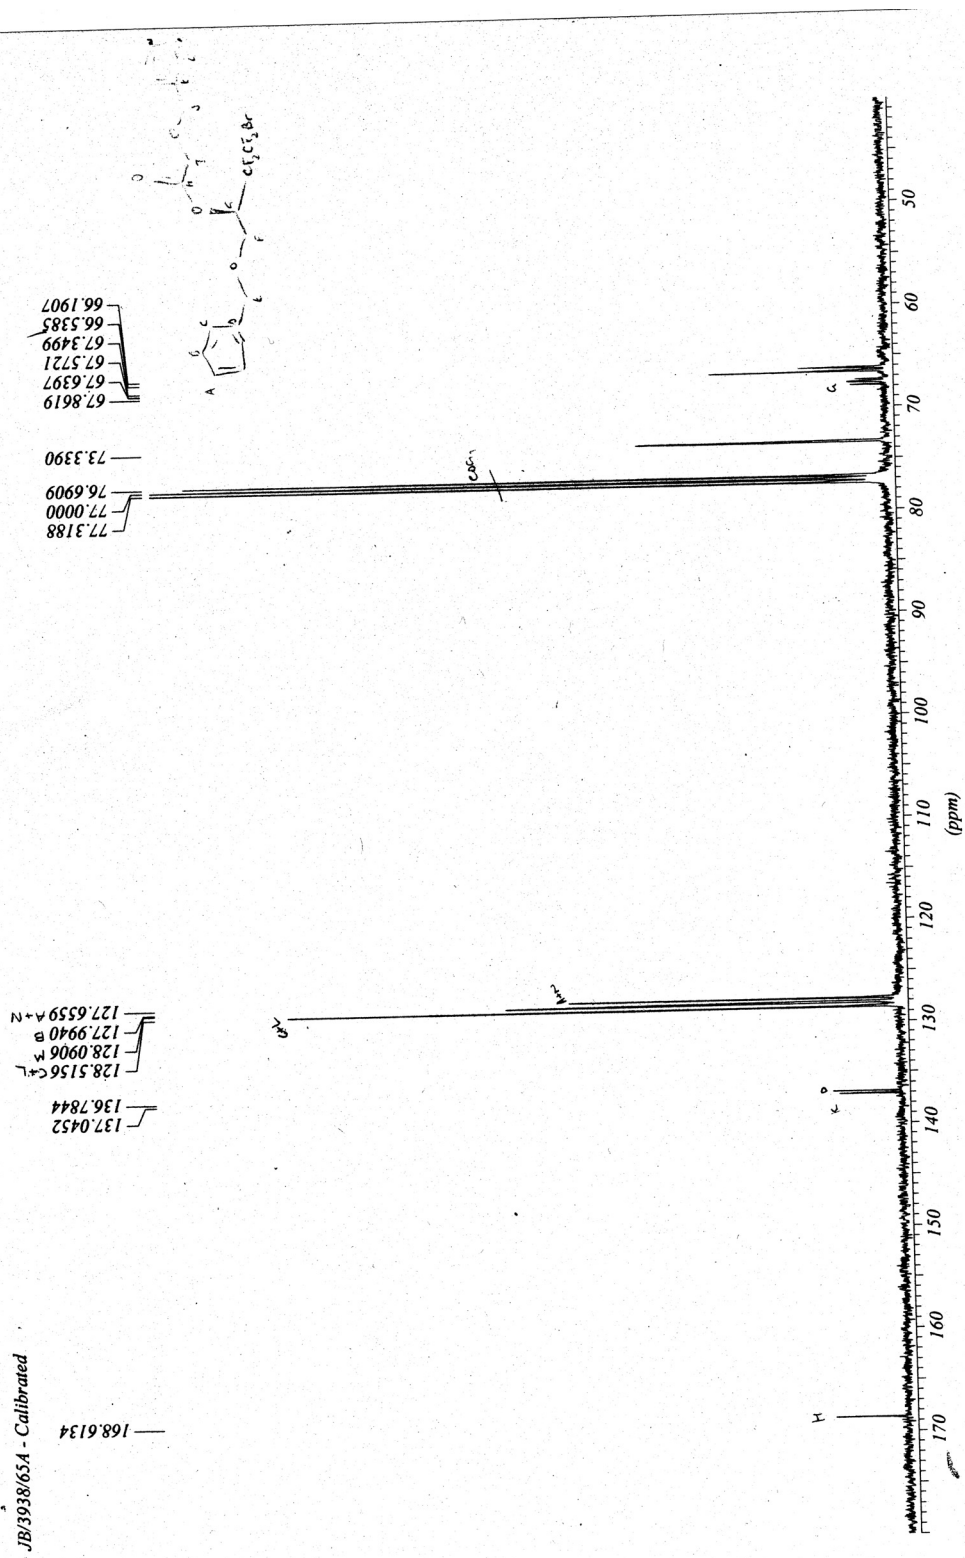

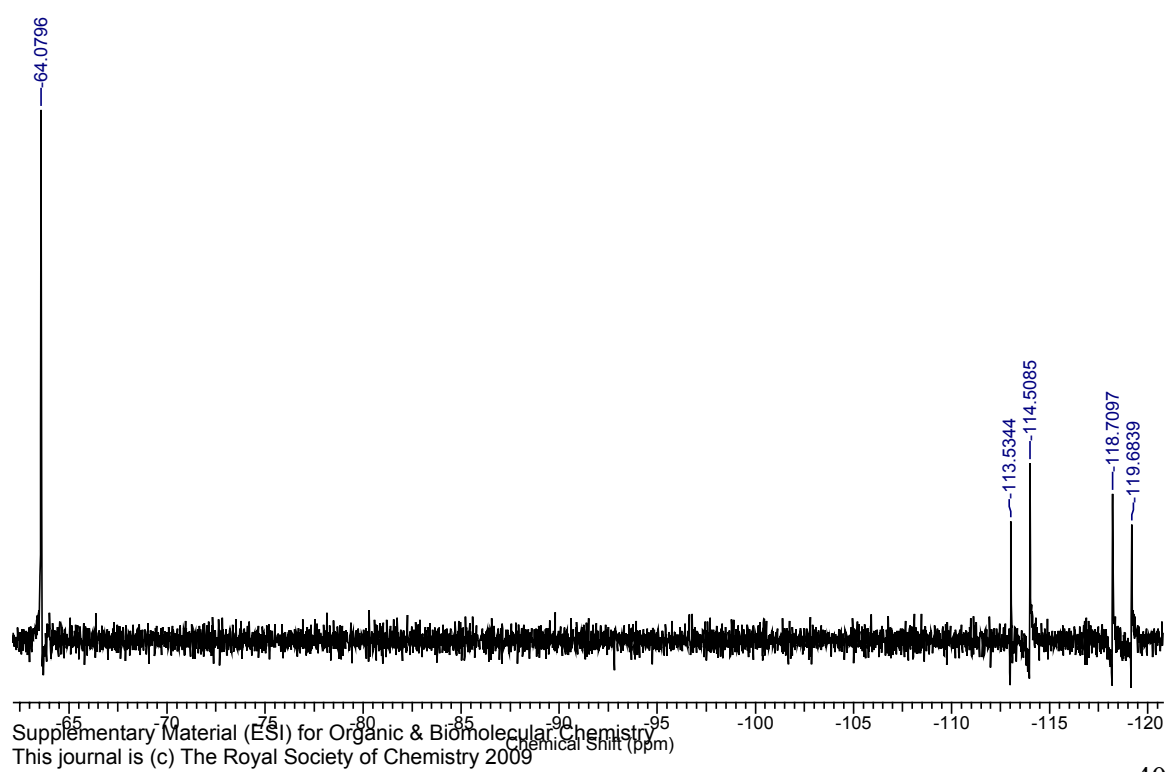



## (2R)-(2-benzyloxy-4-bromo-3,3,4-tetrafluoro)but-1-yl formate (33)

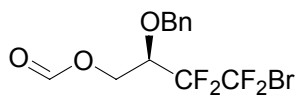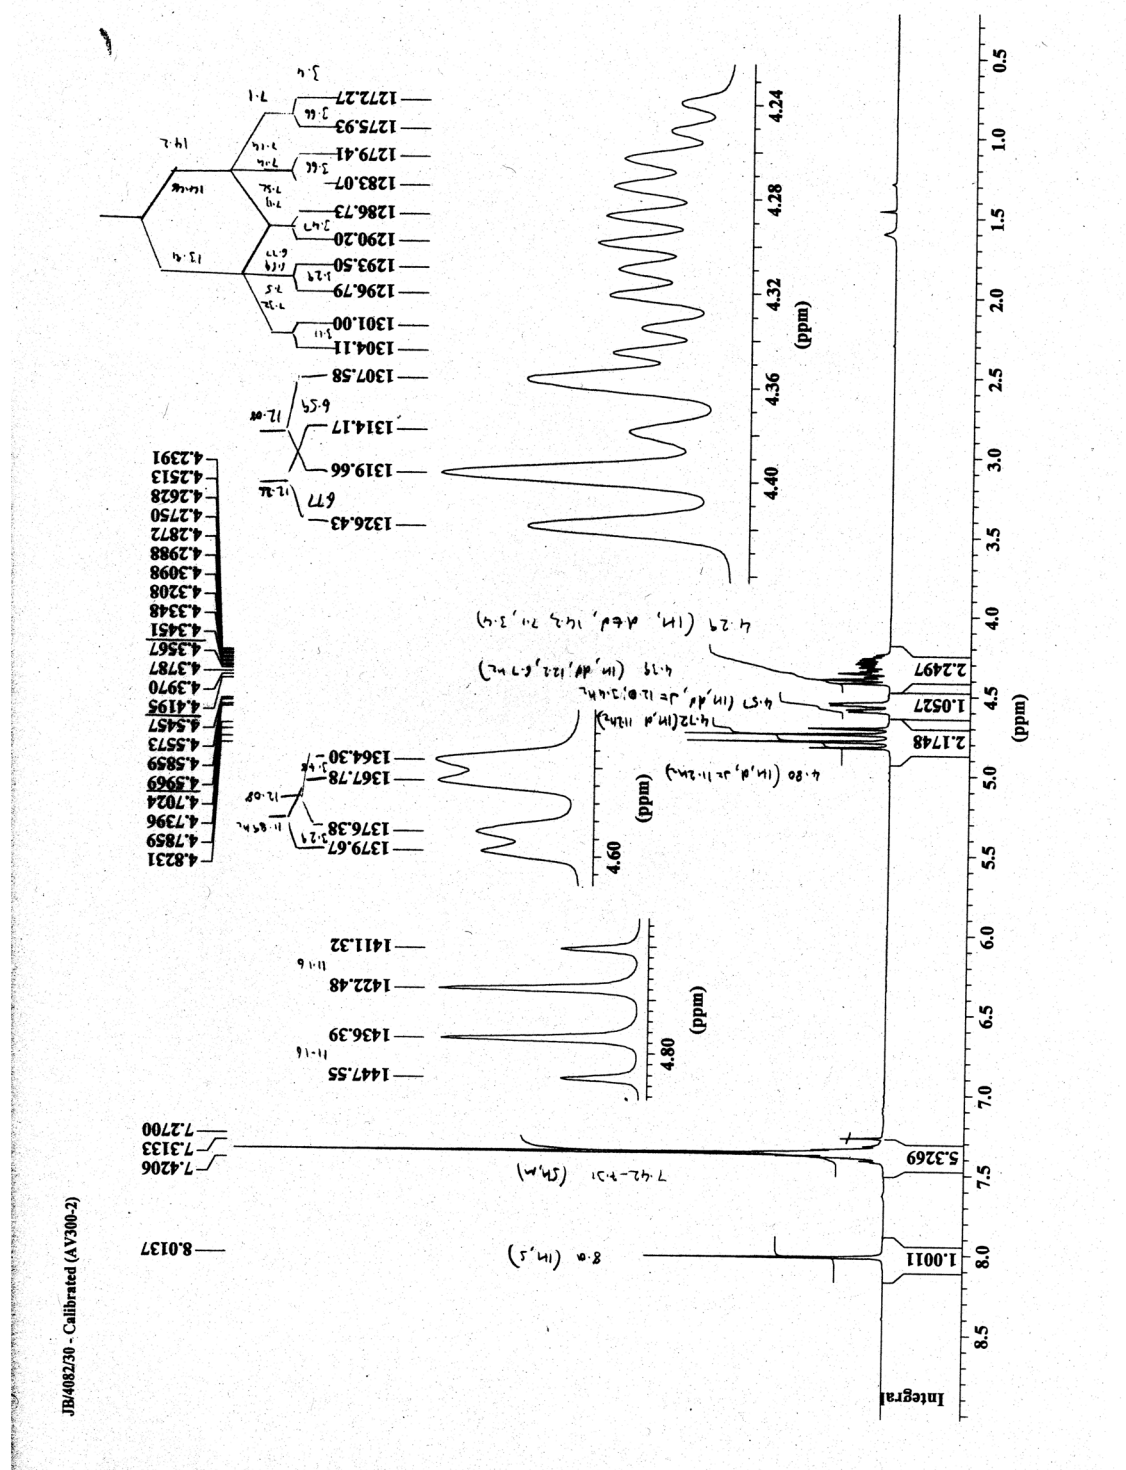

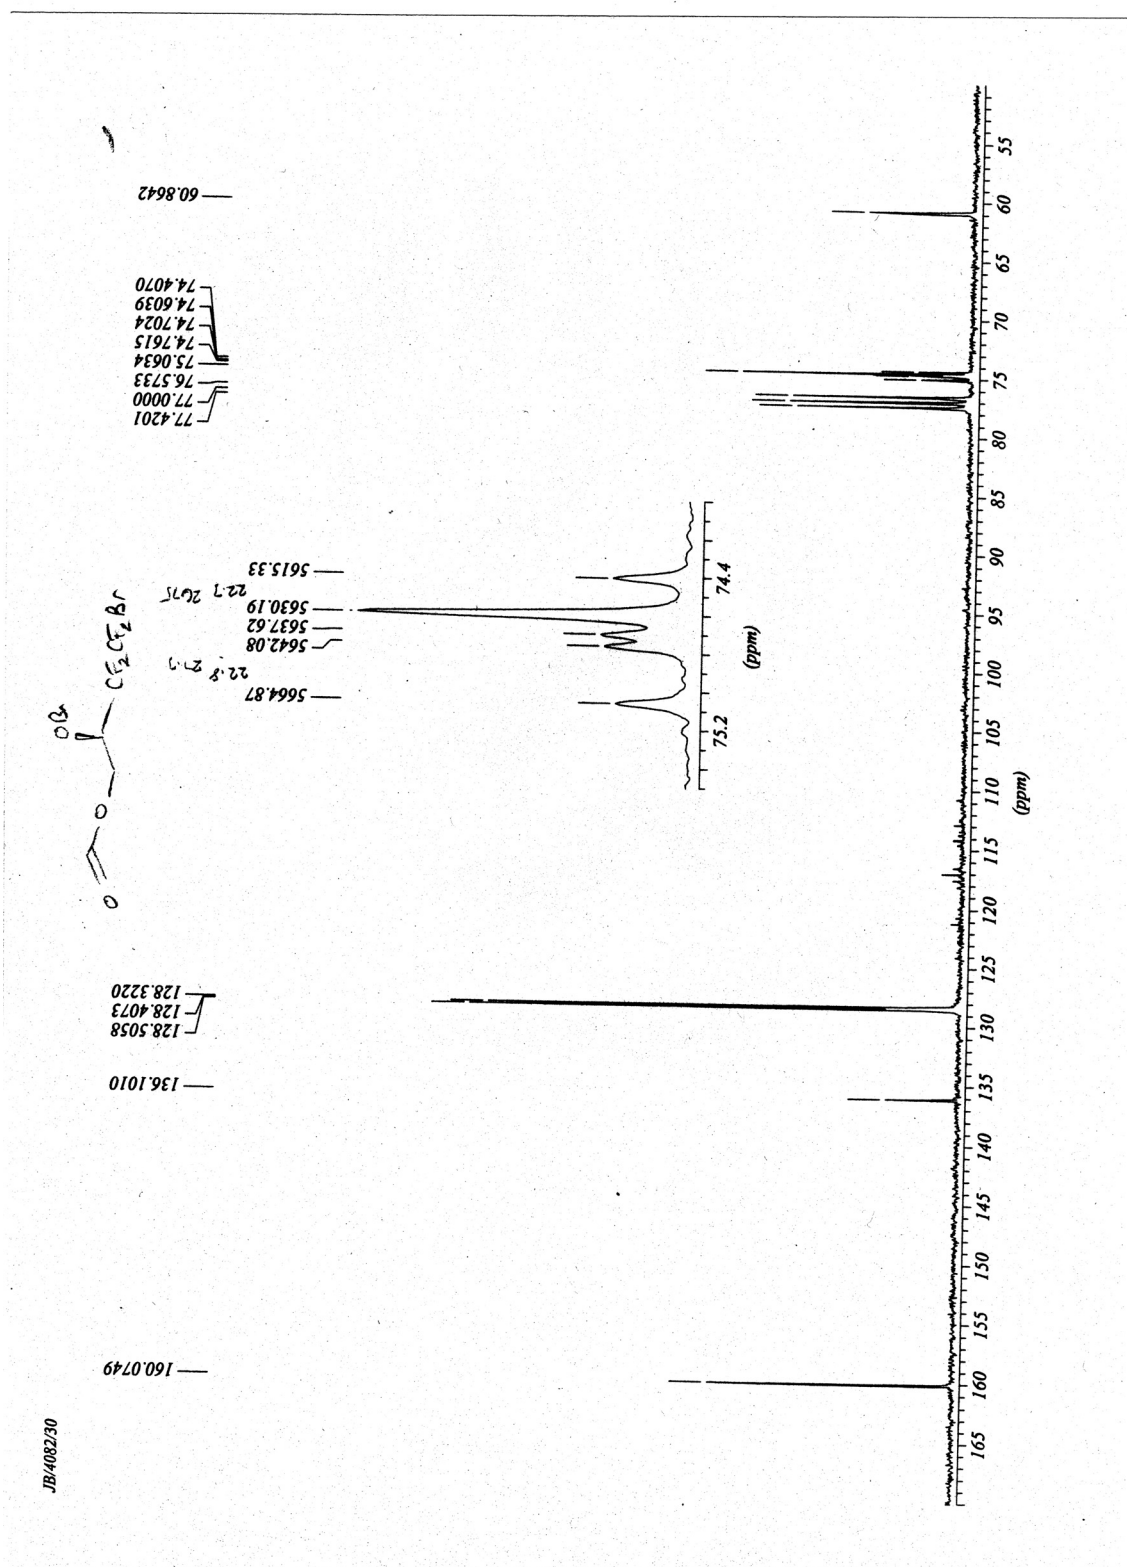

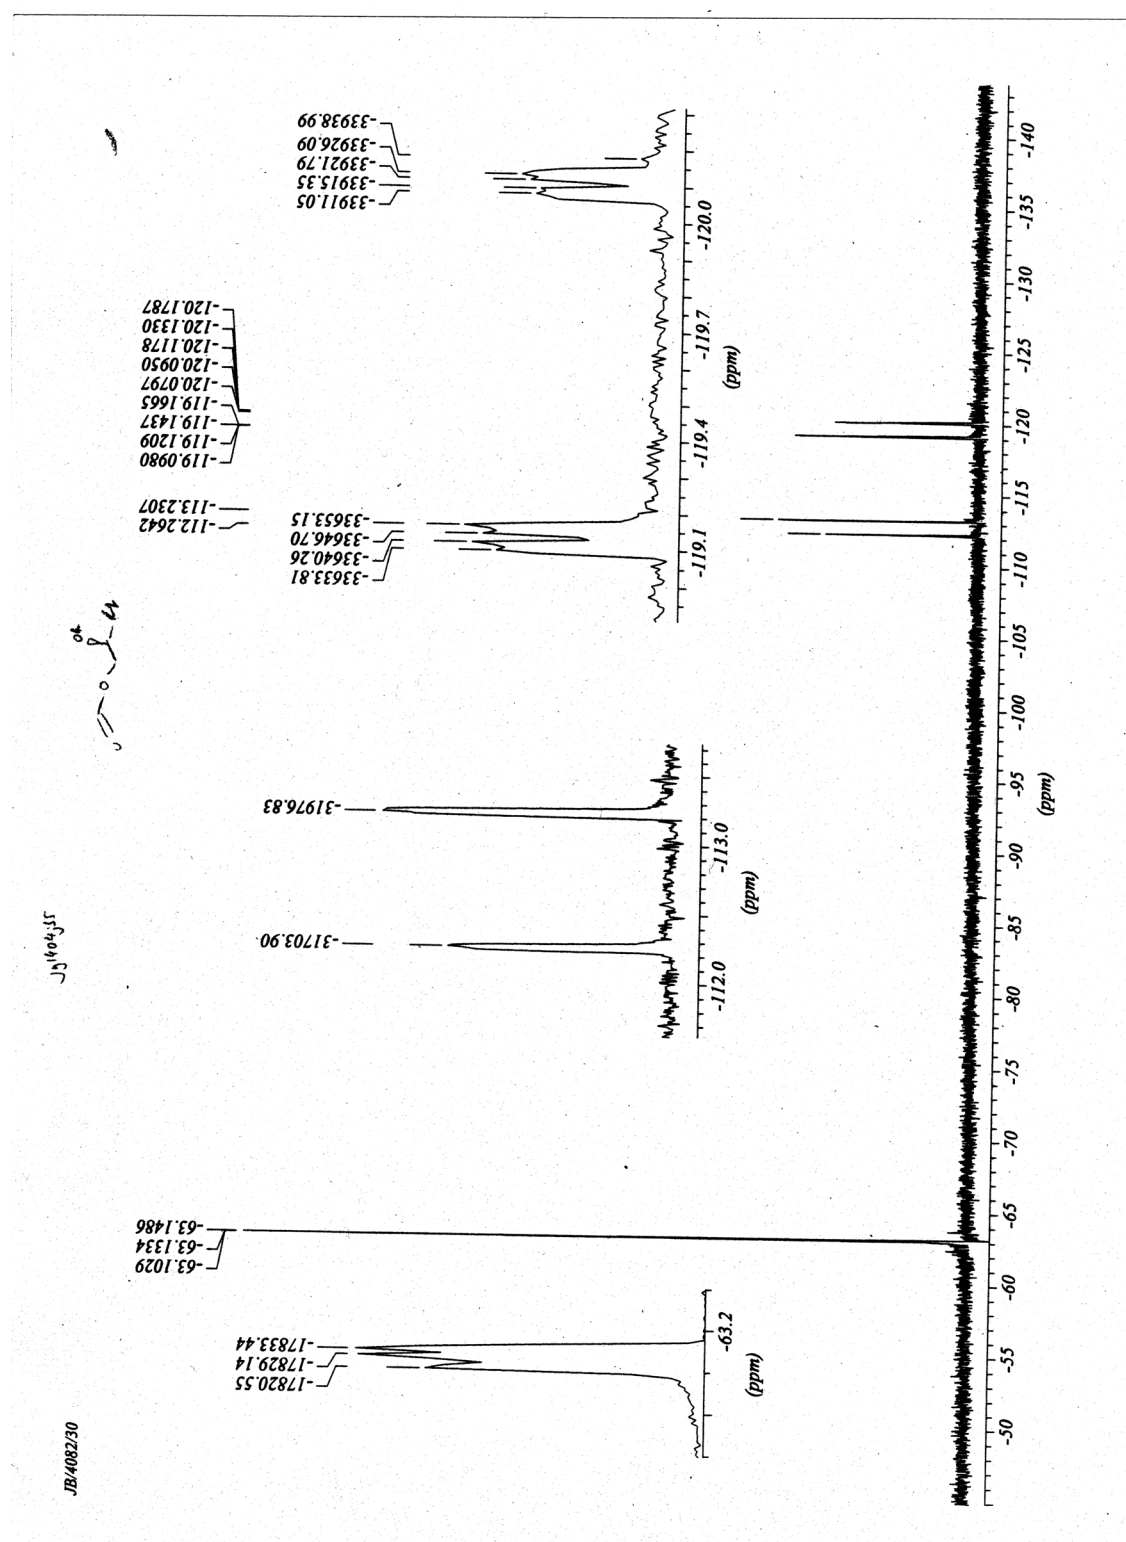

**(2R)-(2-benzyloxy-4-bromo-3,3,4-tetrafluoro)but-1-yl benzyloxyethanoate 34**

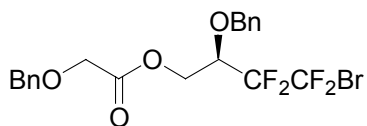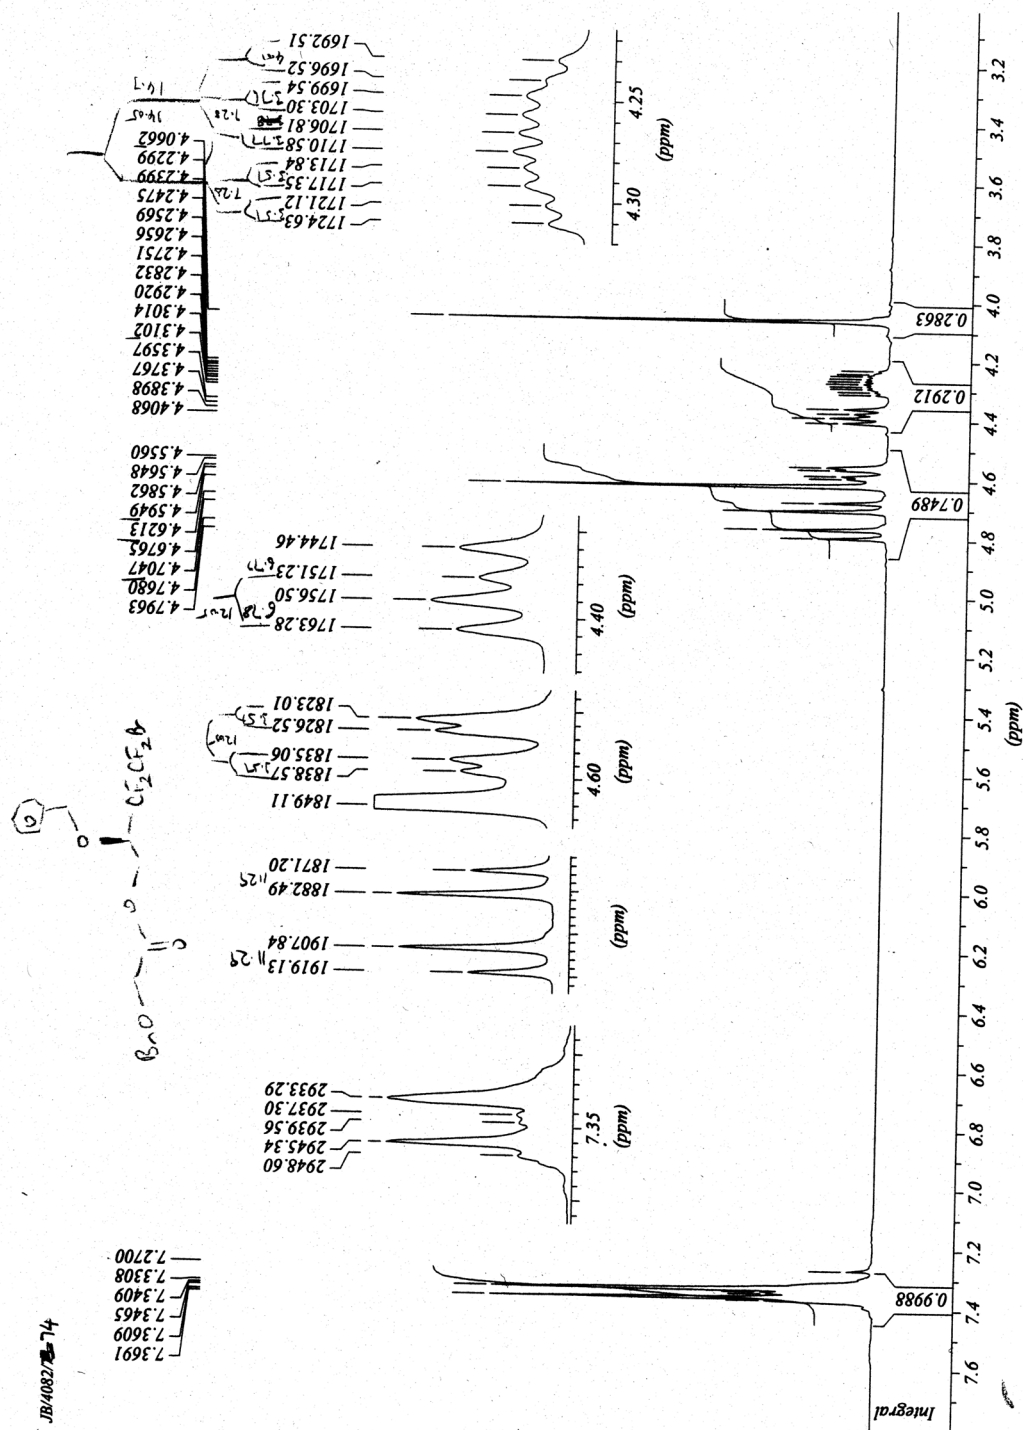

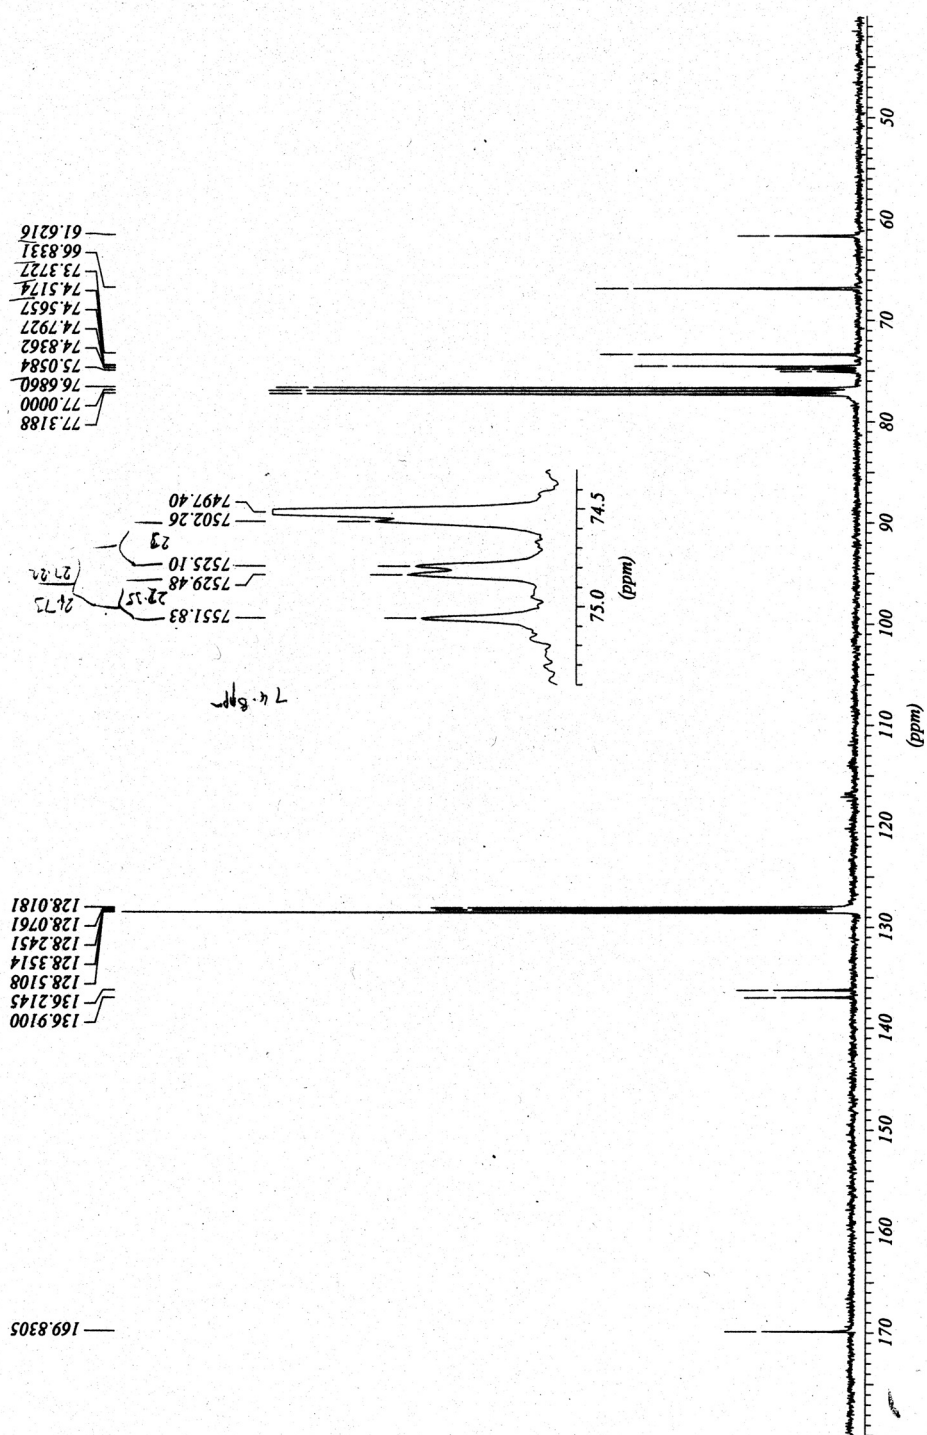

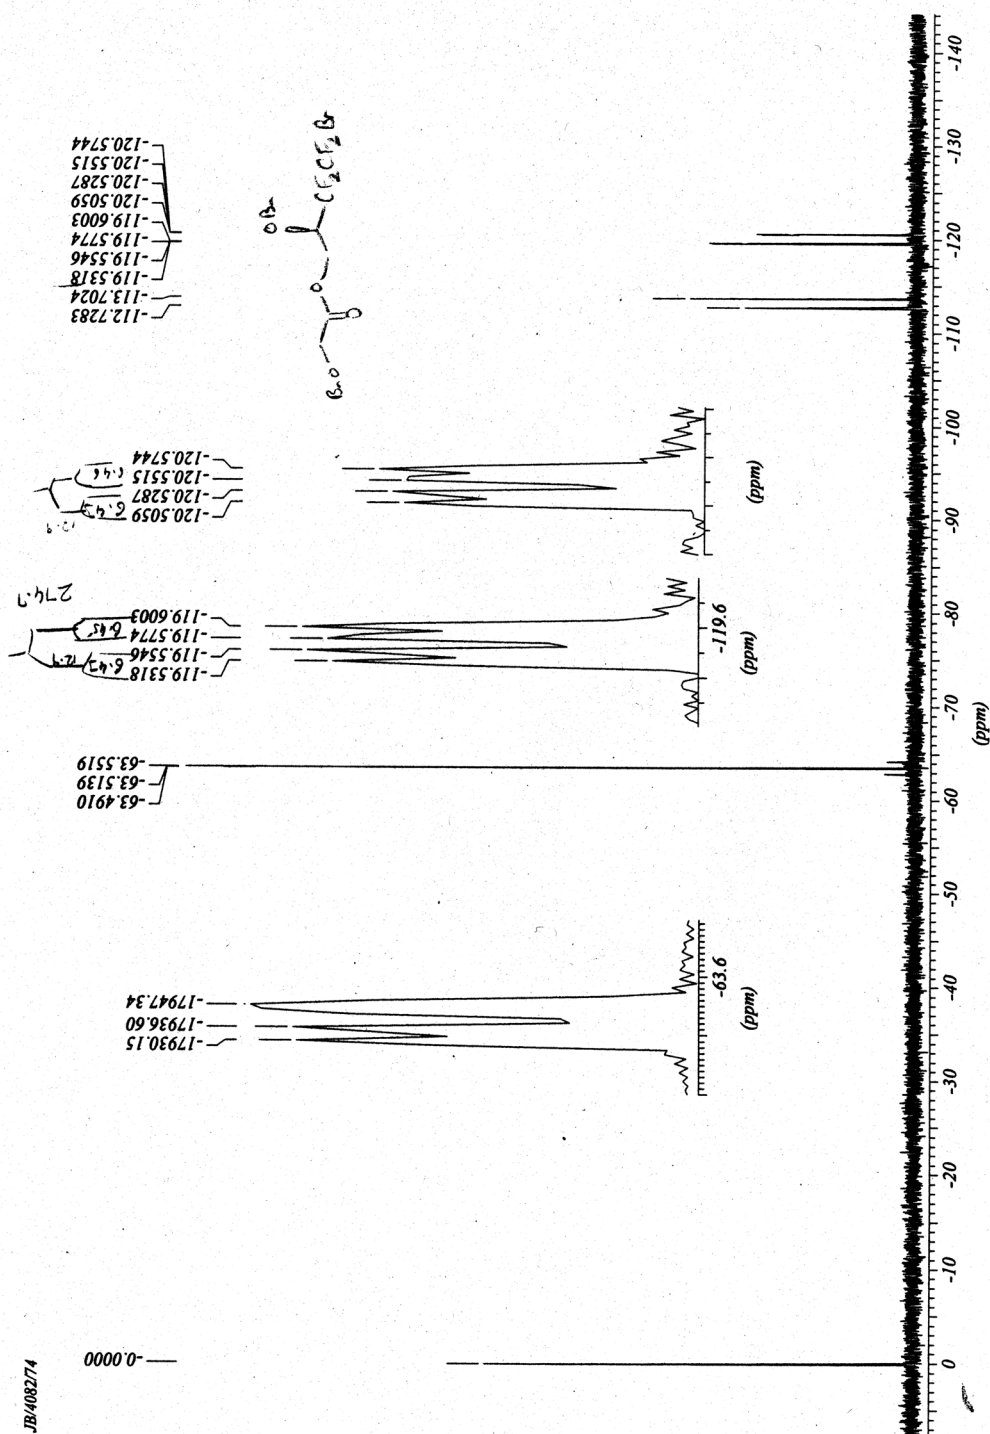

**(5R)-5-Benzyloxymethyl-3,3,4,4-tetrafluoro-tetrahydrofuran-2-ol 2**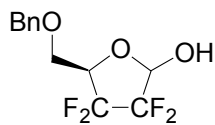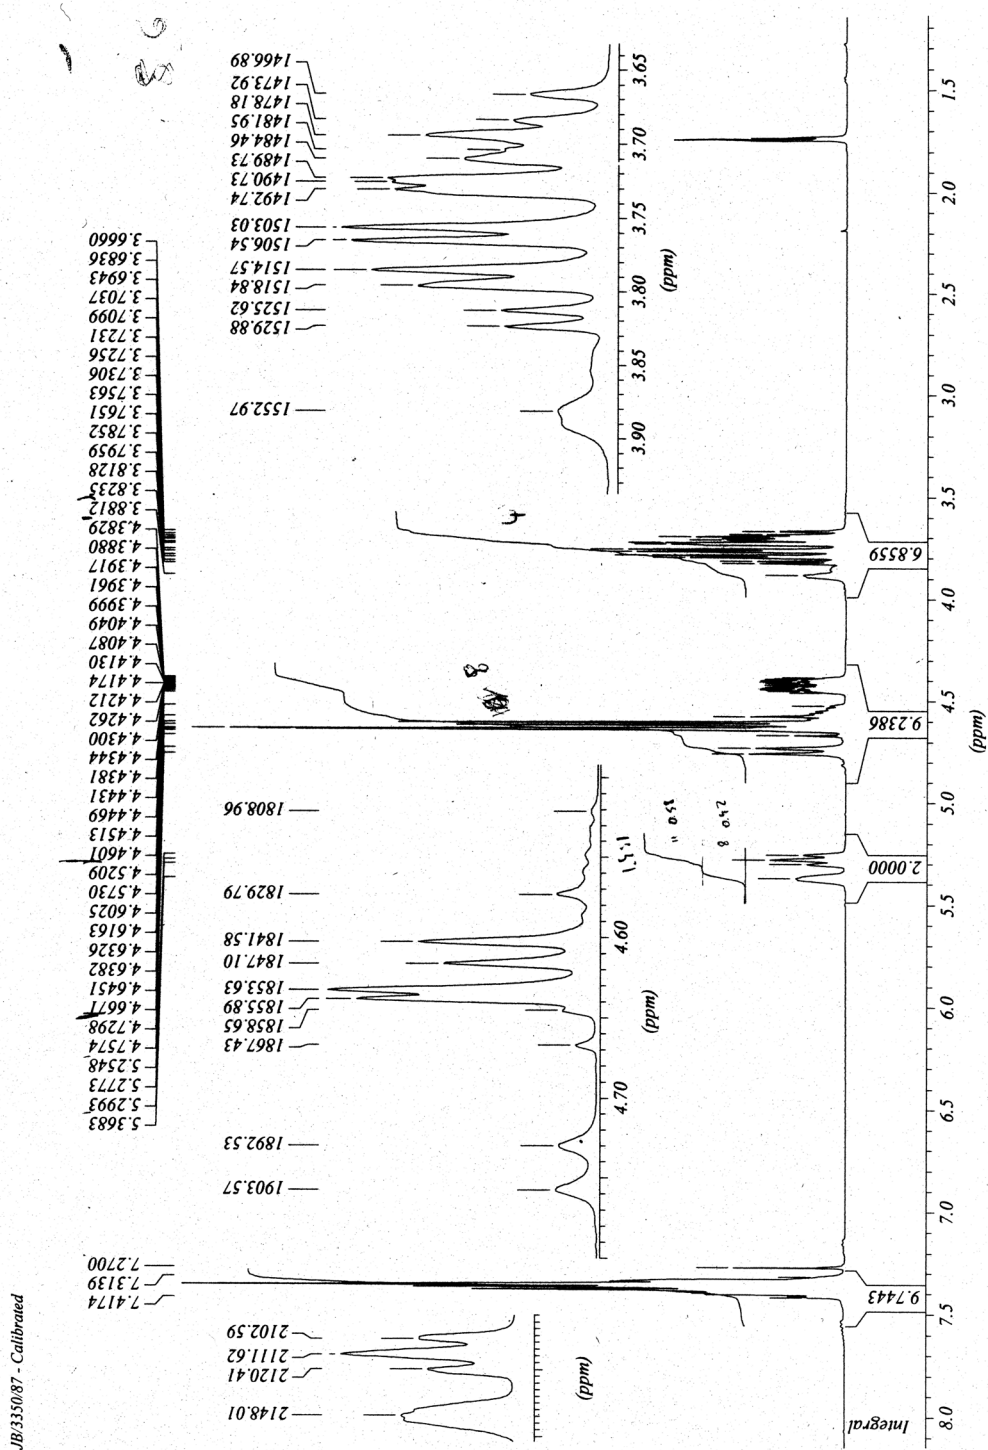

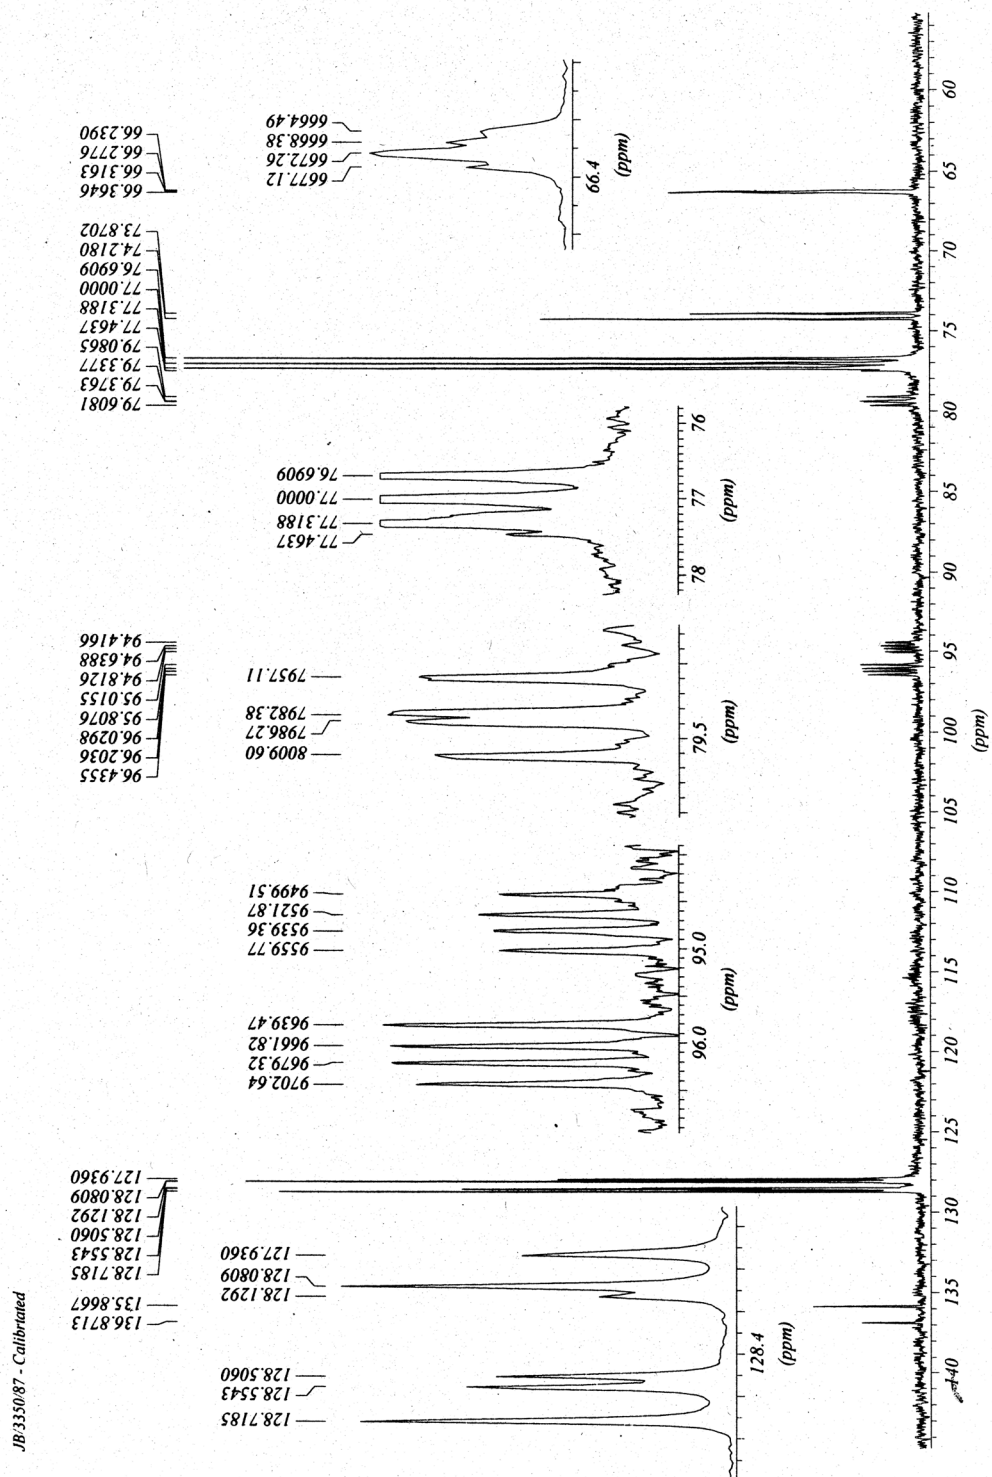



## tetra fluoro furanose

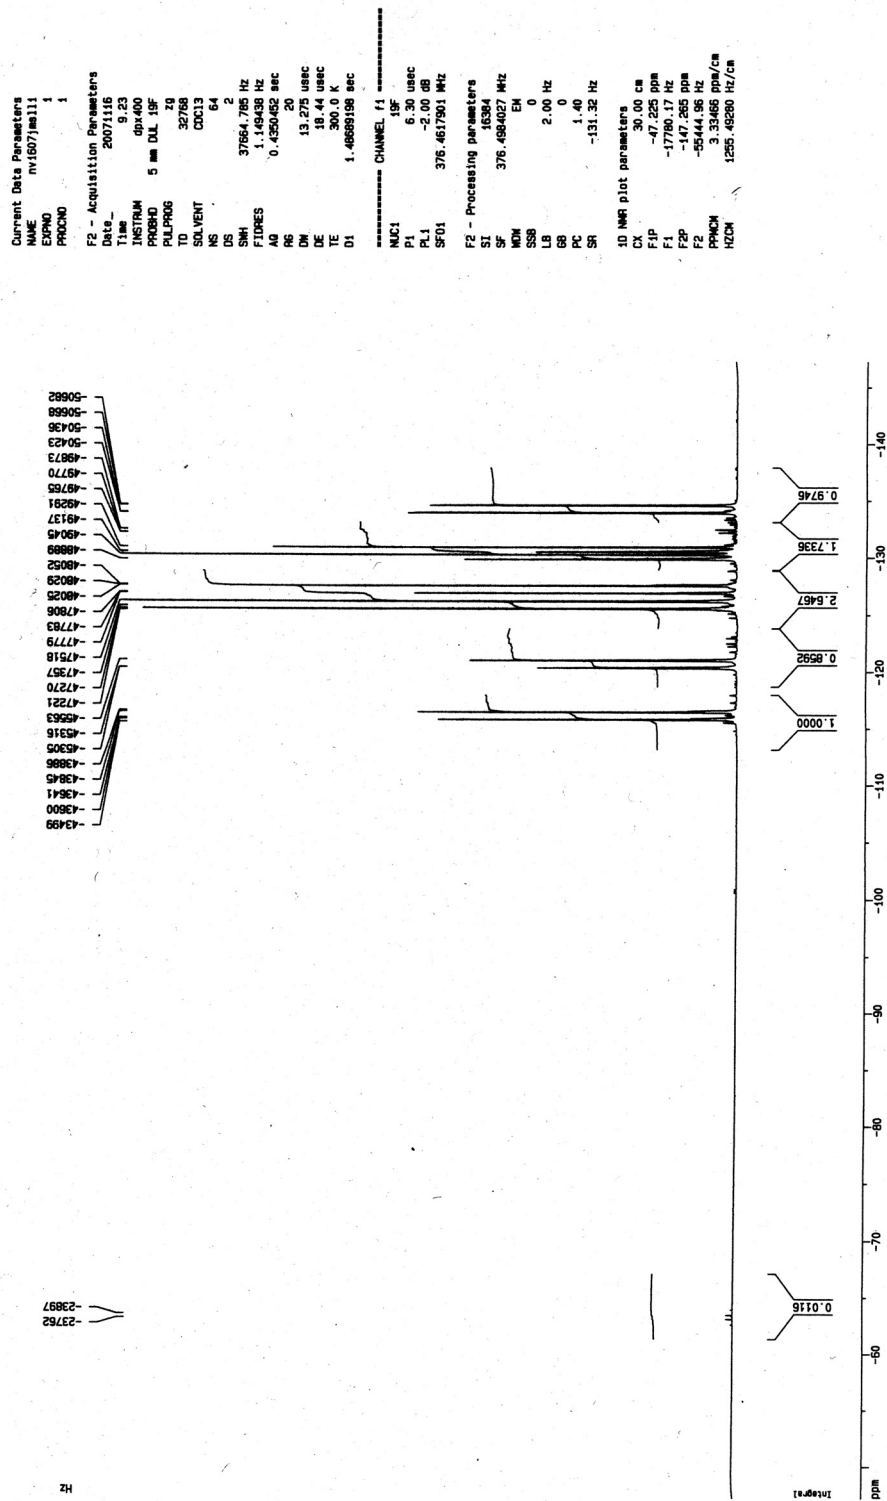

**(2R)-1-Benzyloxy-3,4,4-trifluorobut-3-ene-1,2-diol (30)**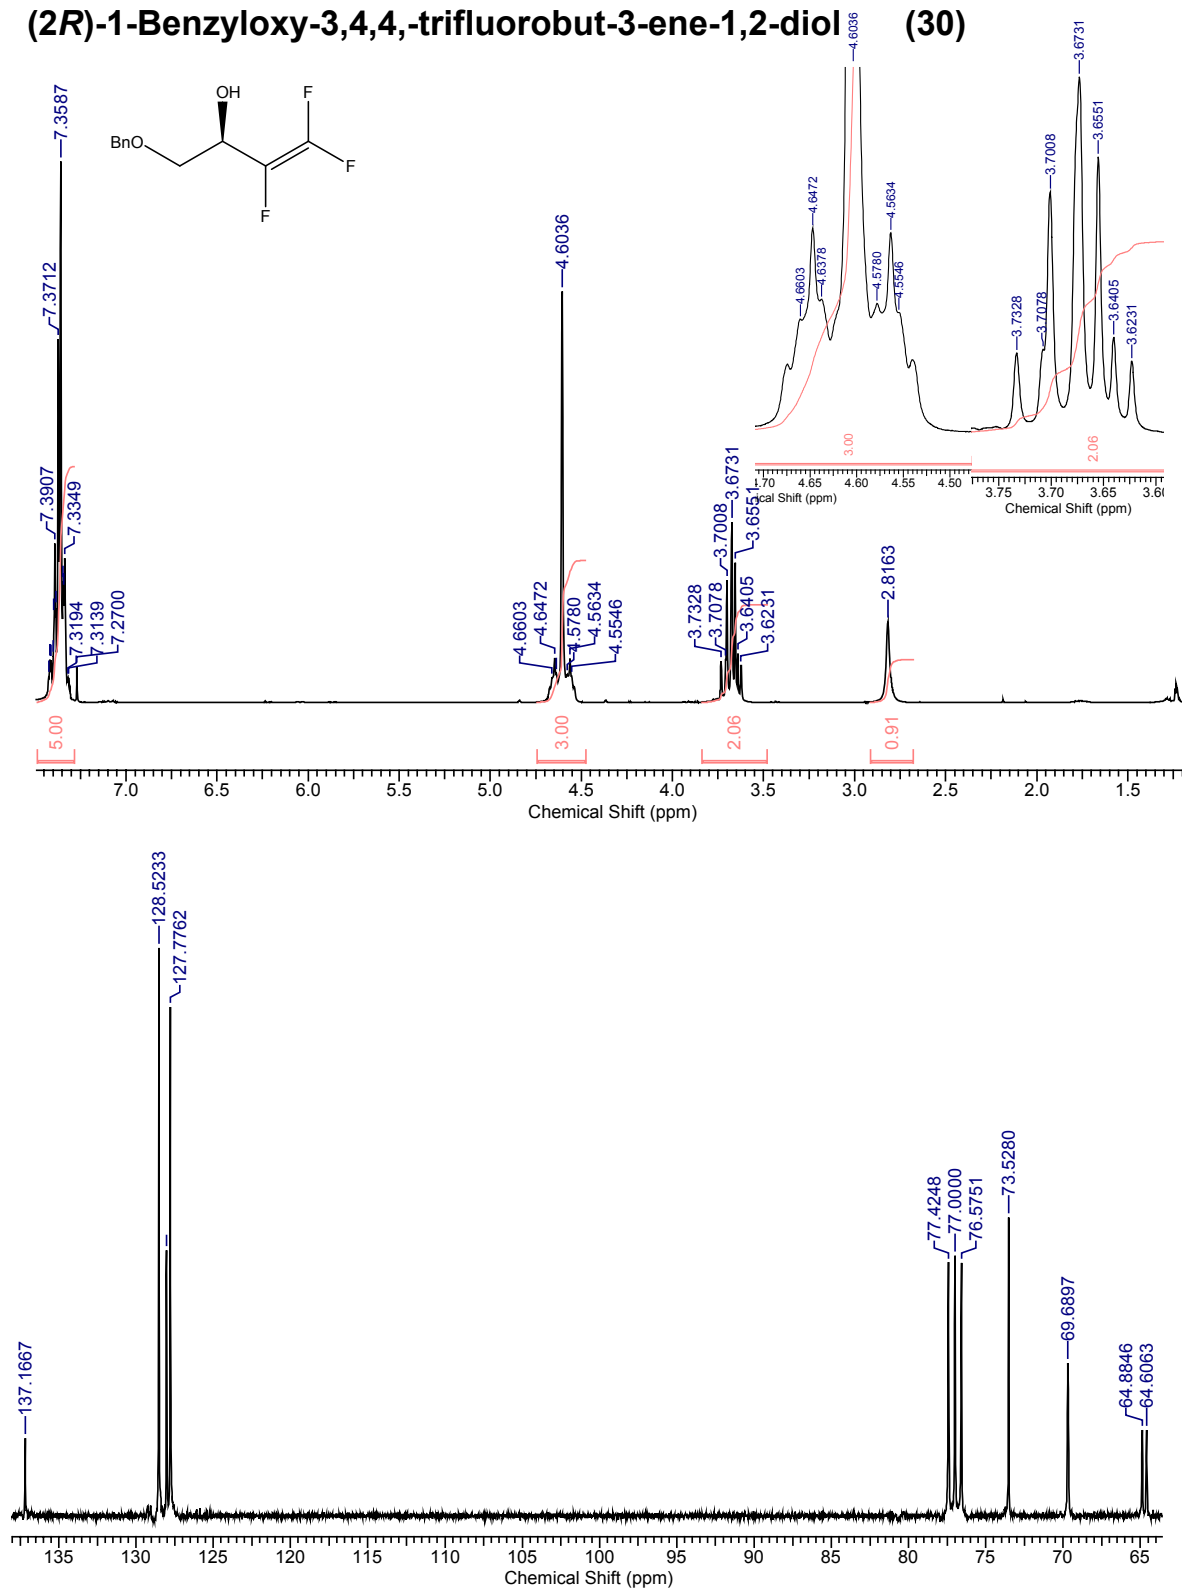

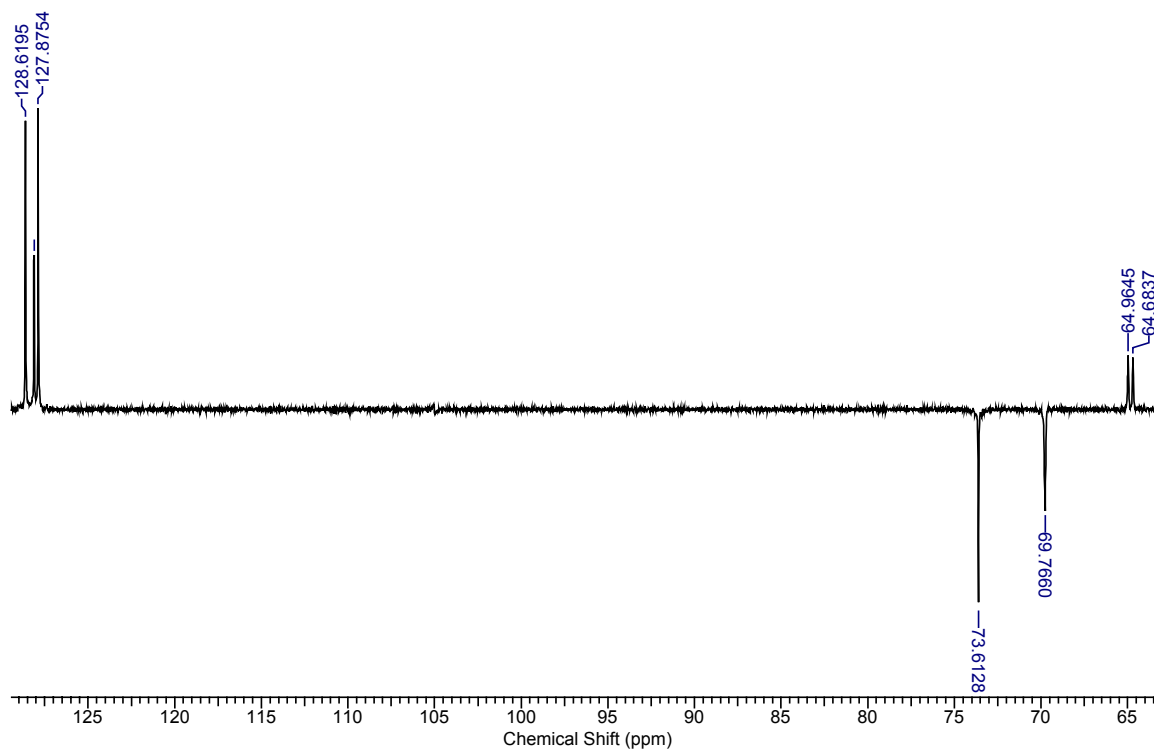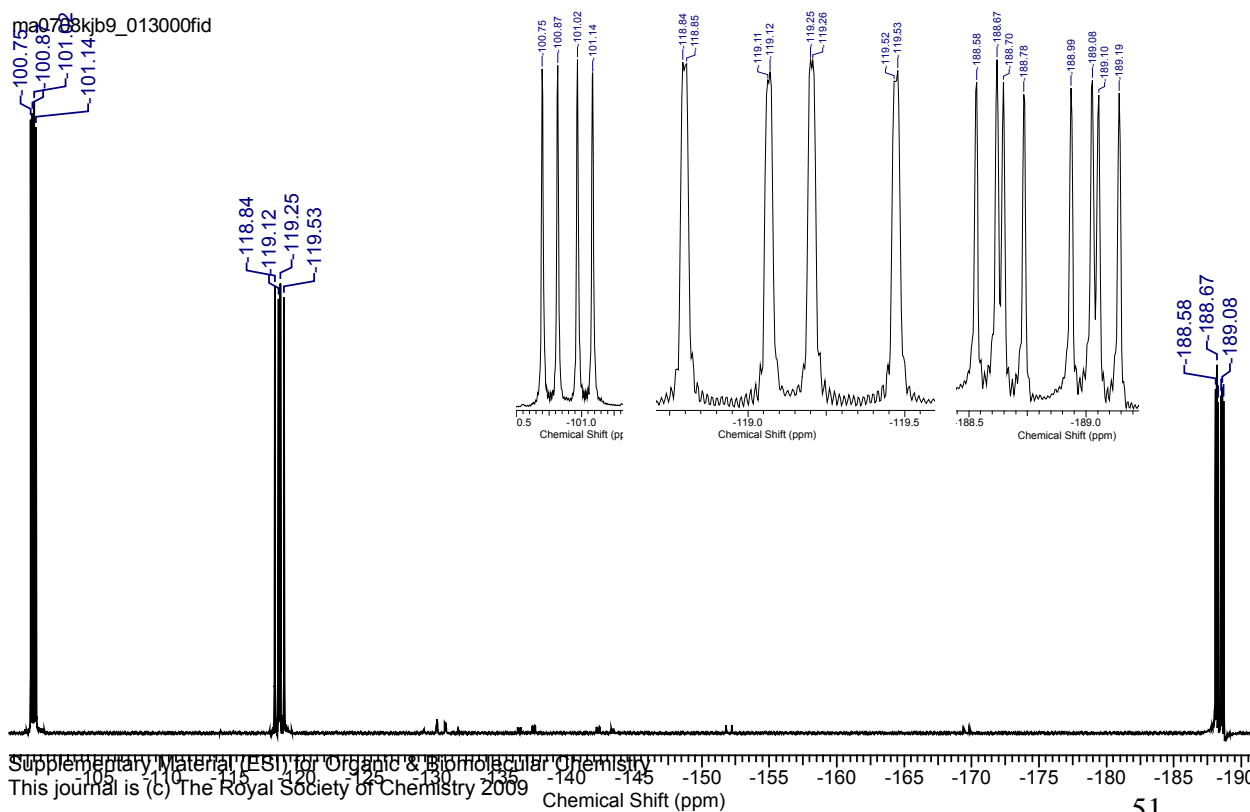

**(5R)-2,5-Bisbenzyloxymethyl-3,3,4,4-tetrafluoro-tetrahydrofuran-2-ol (3)**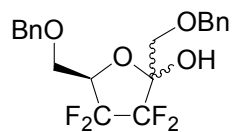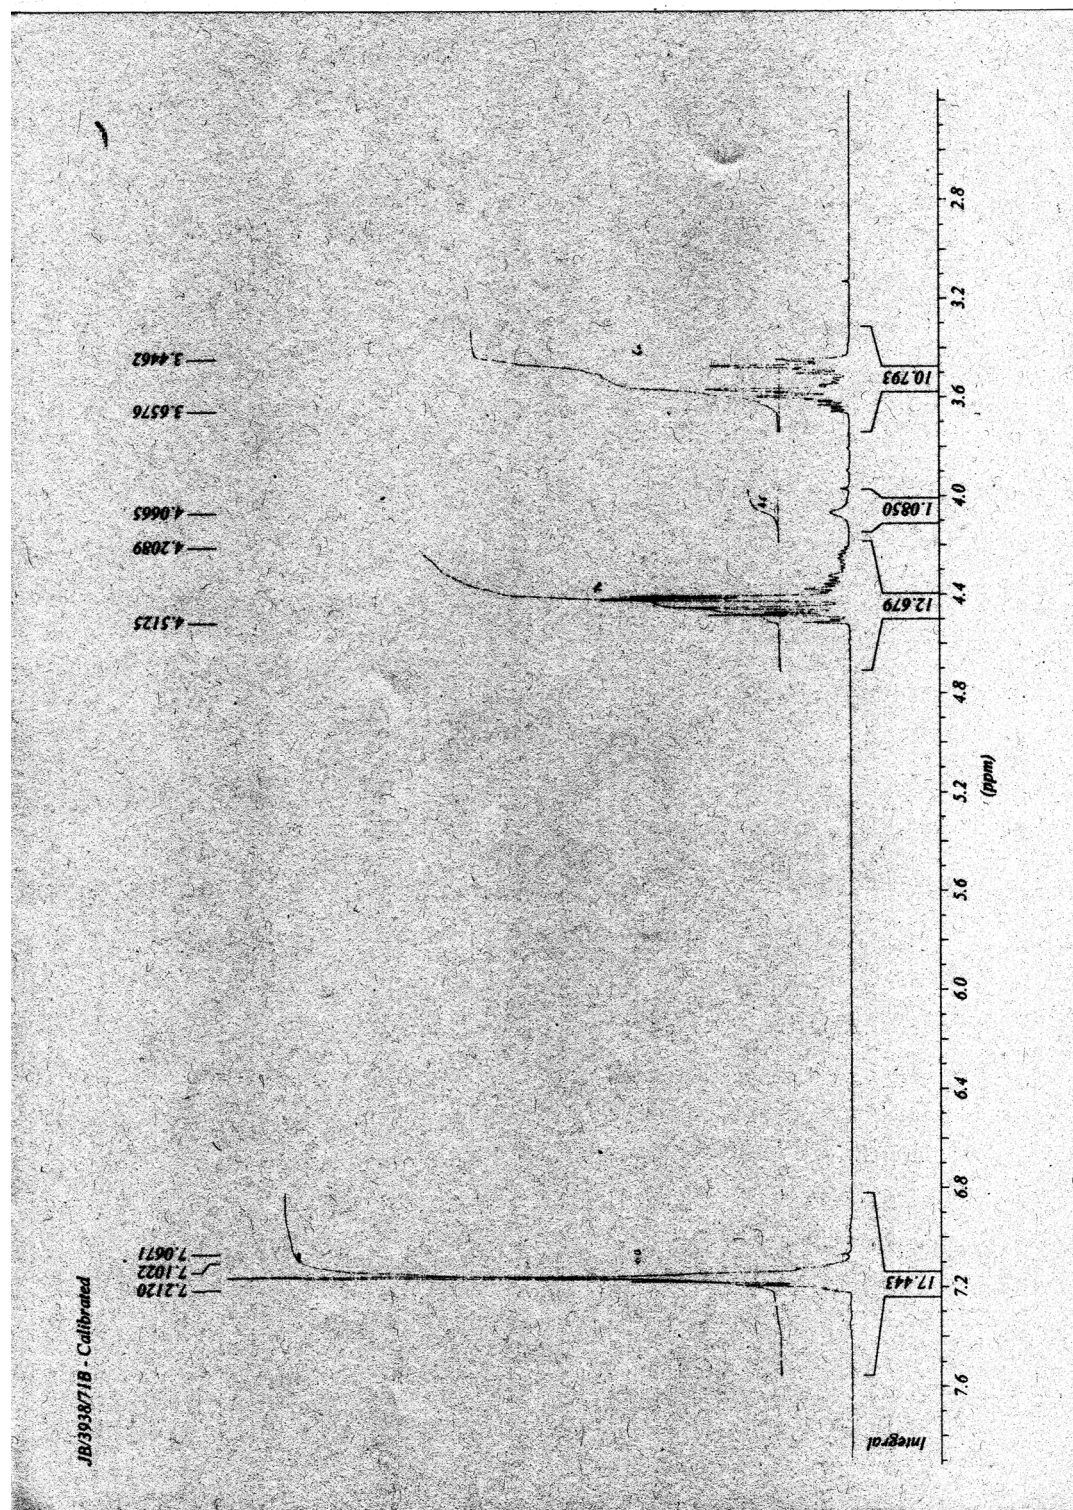

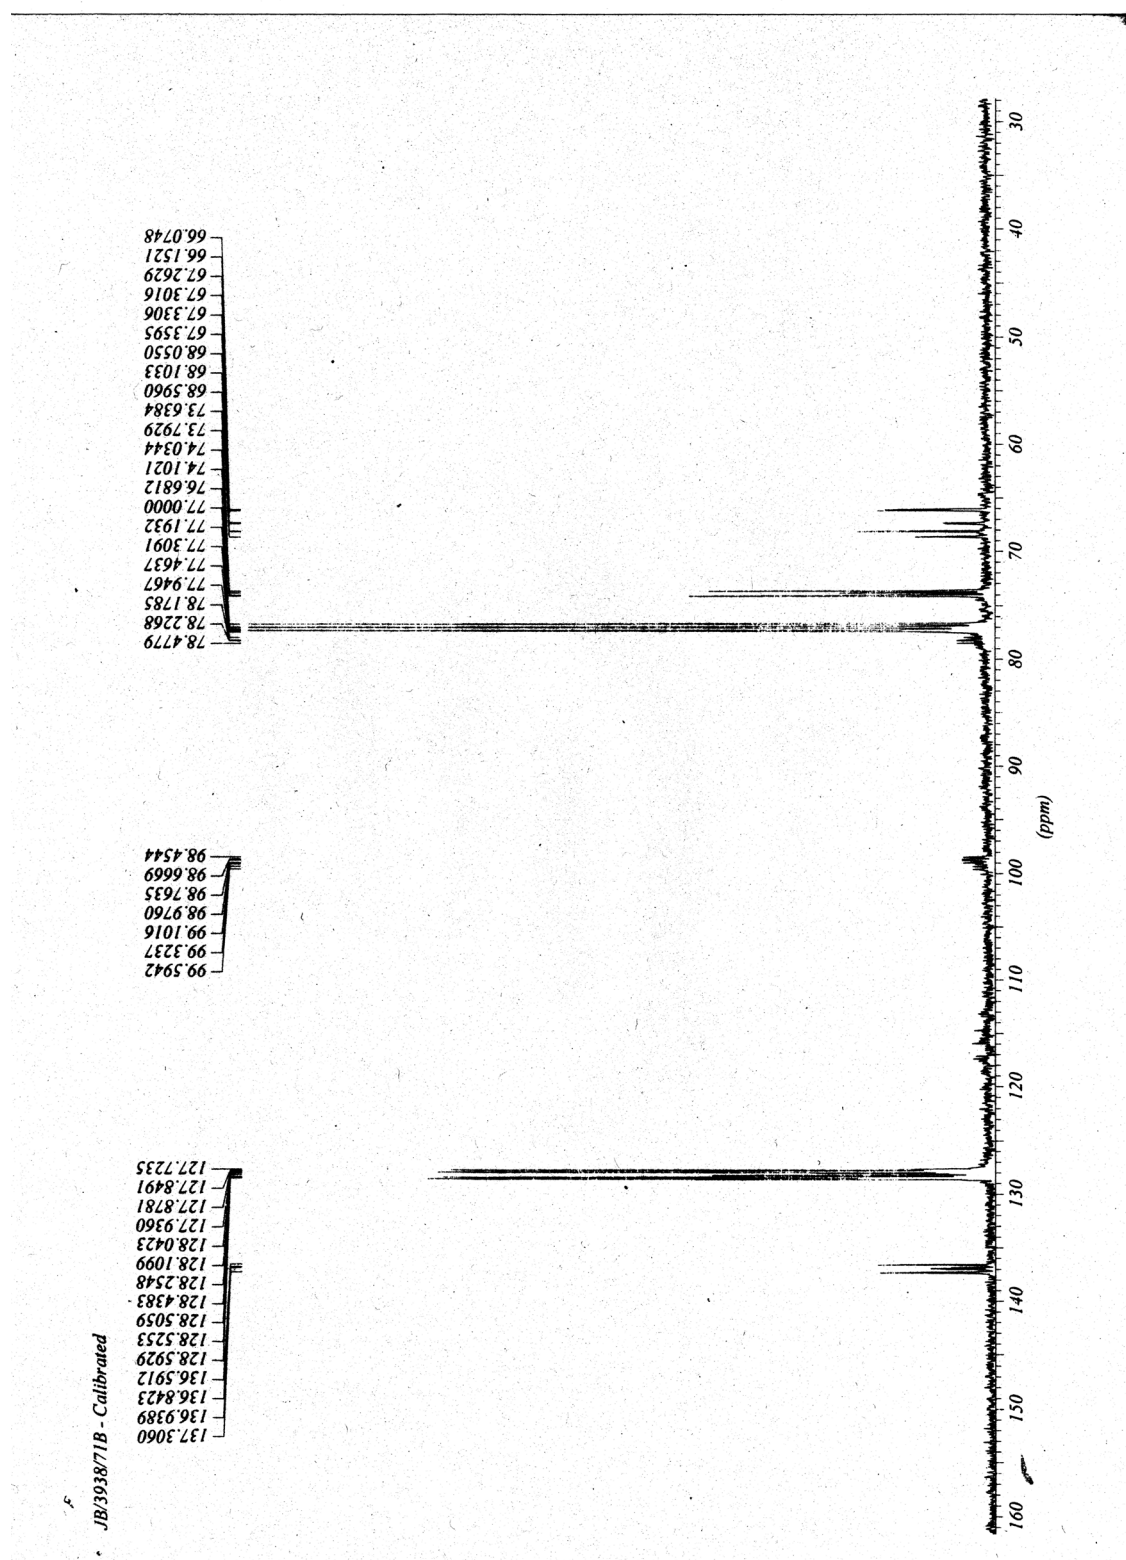

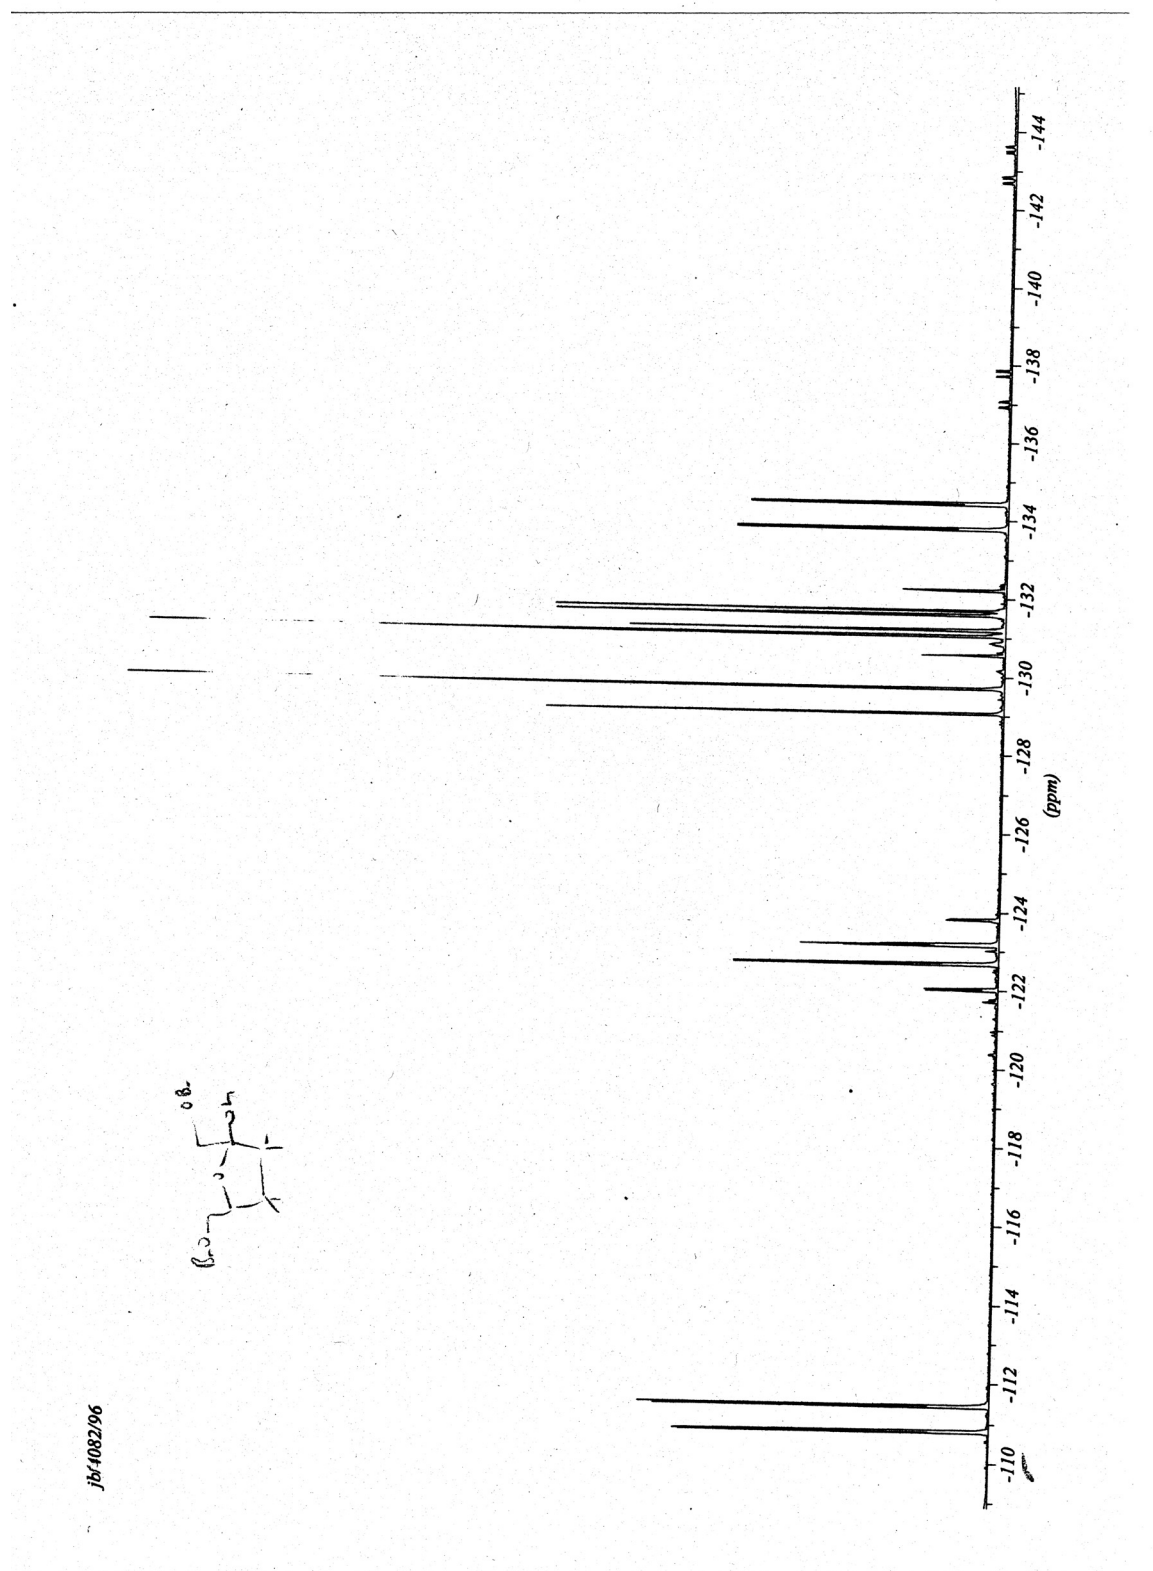

(2*S*,5*R*)-5-Benzyloxy-3,3,4,4-tetrafluoro tetrahydropyran-2-ol (4) ( $\alpha$  anomer)

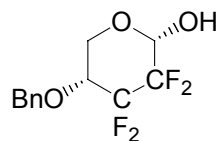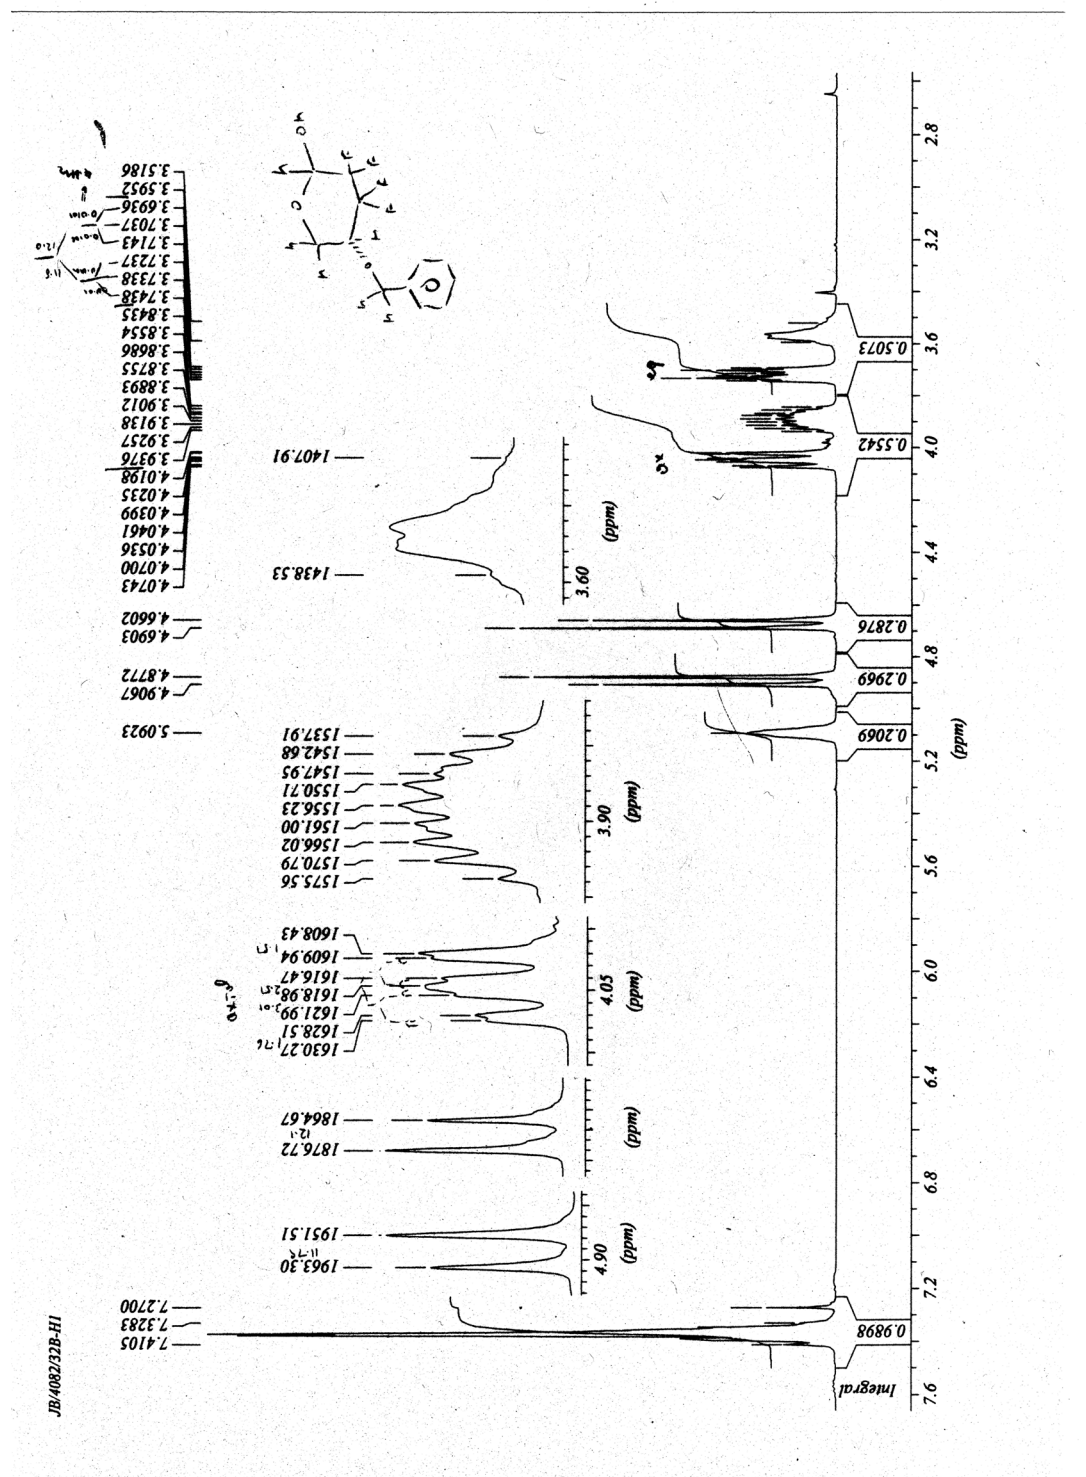

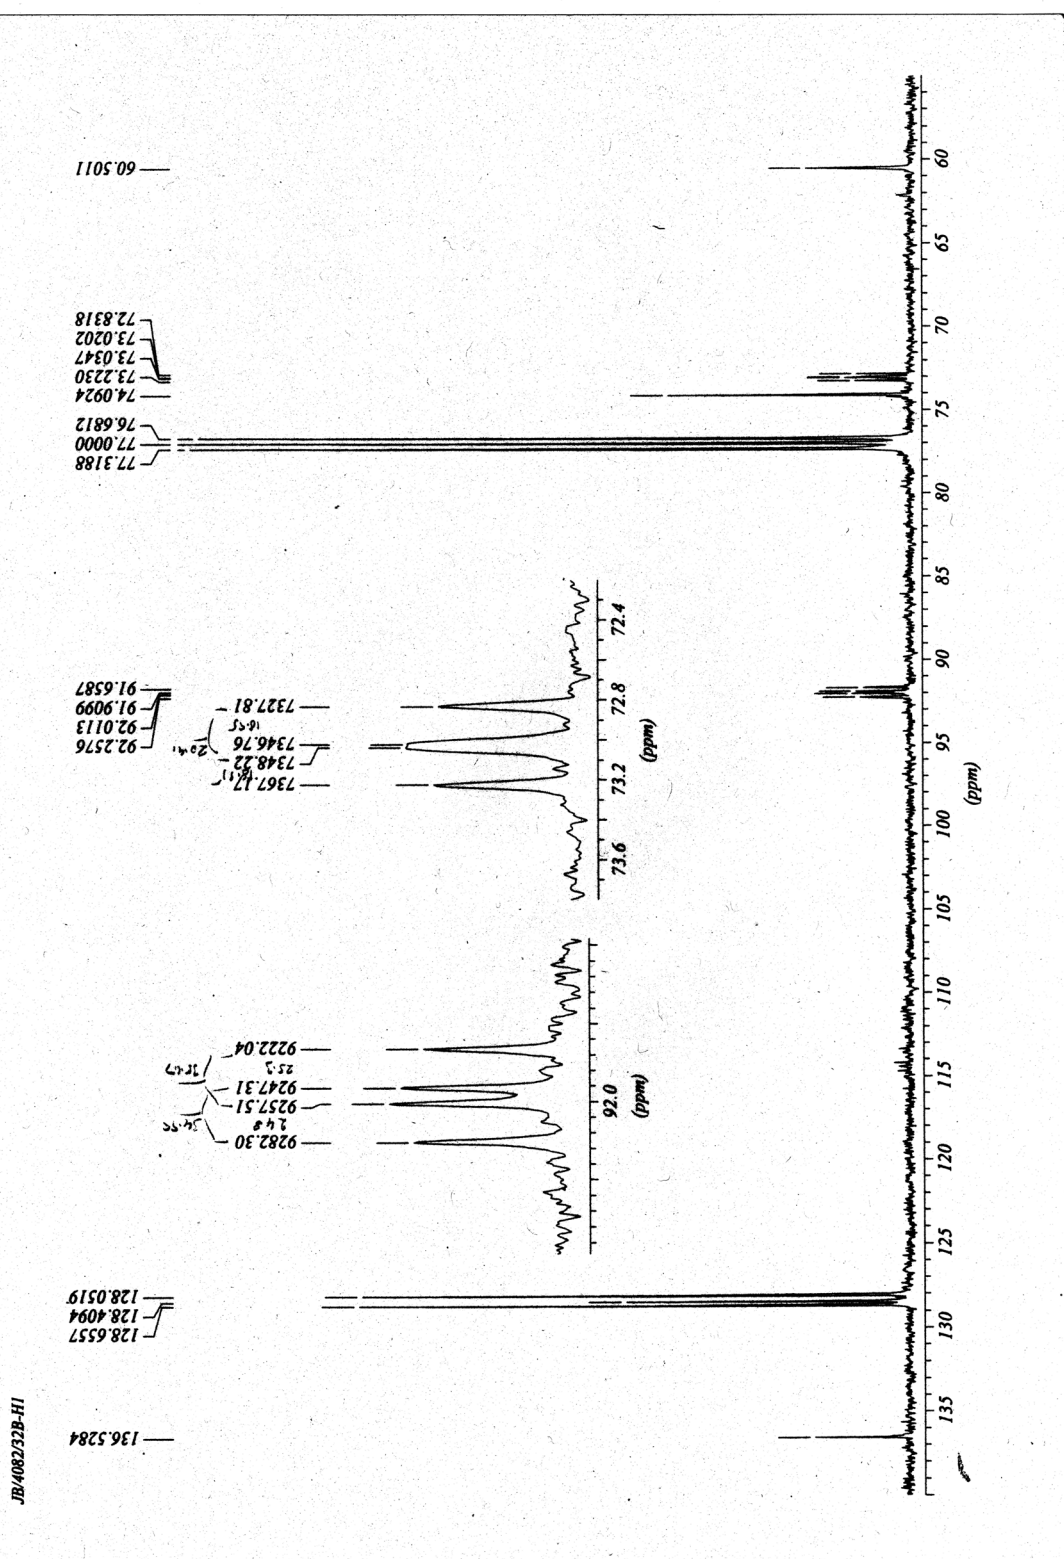





**(2R,5R)-5-Benzyloxy-3,3,4,4-tetrafluoro tetrahydropyran-2-ol (4)( $\beta$  anomer)**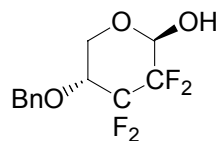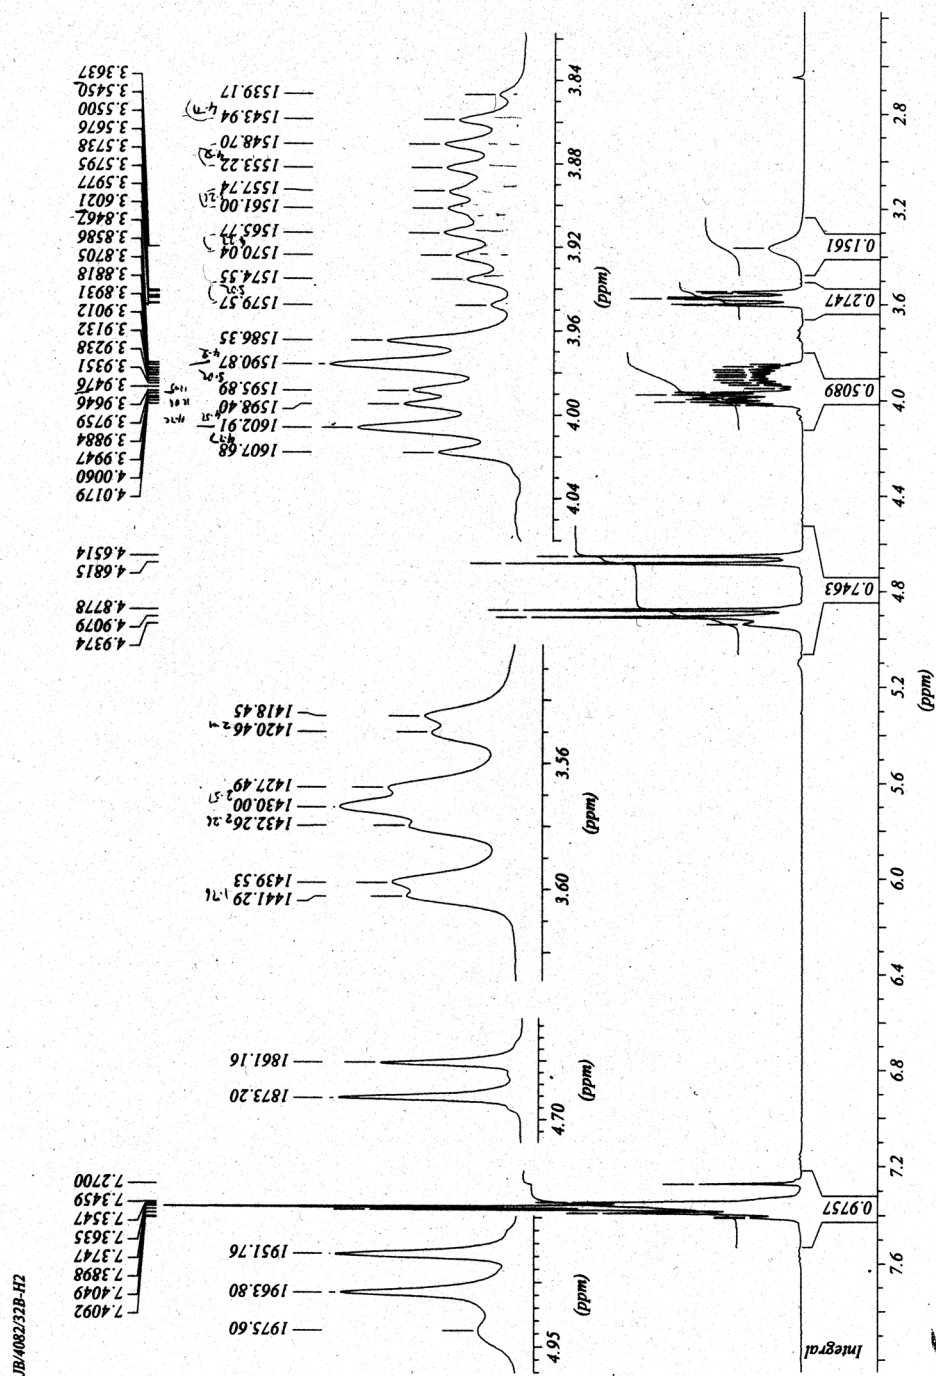

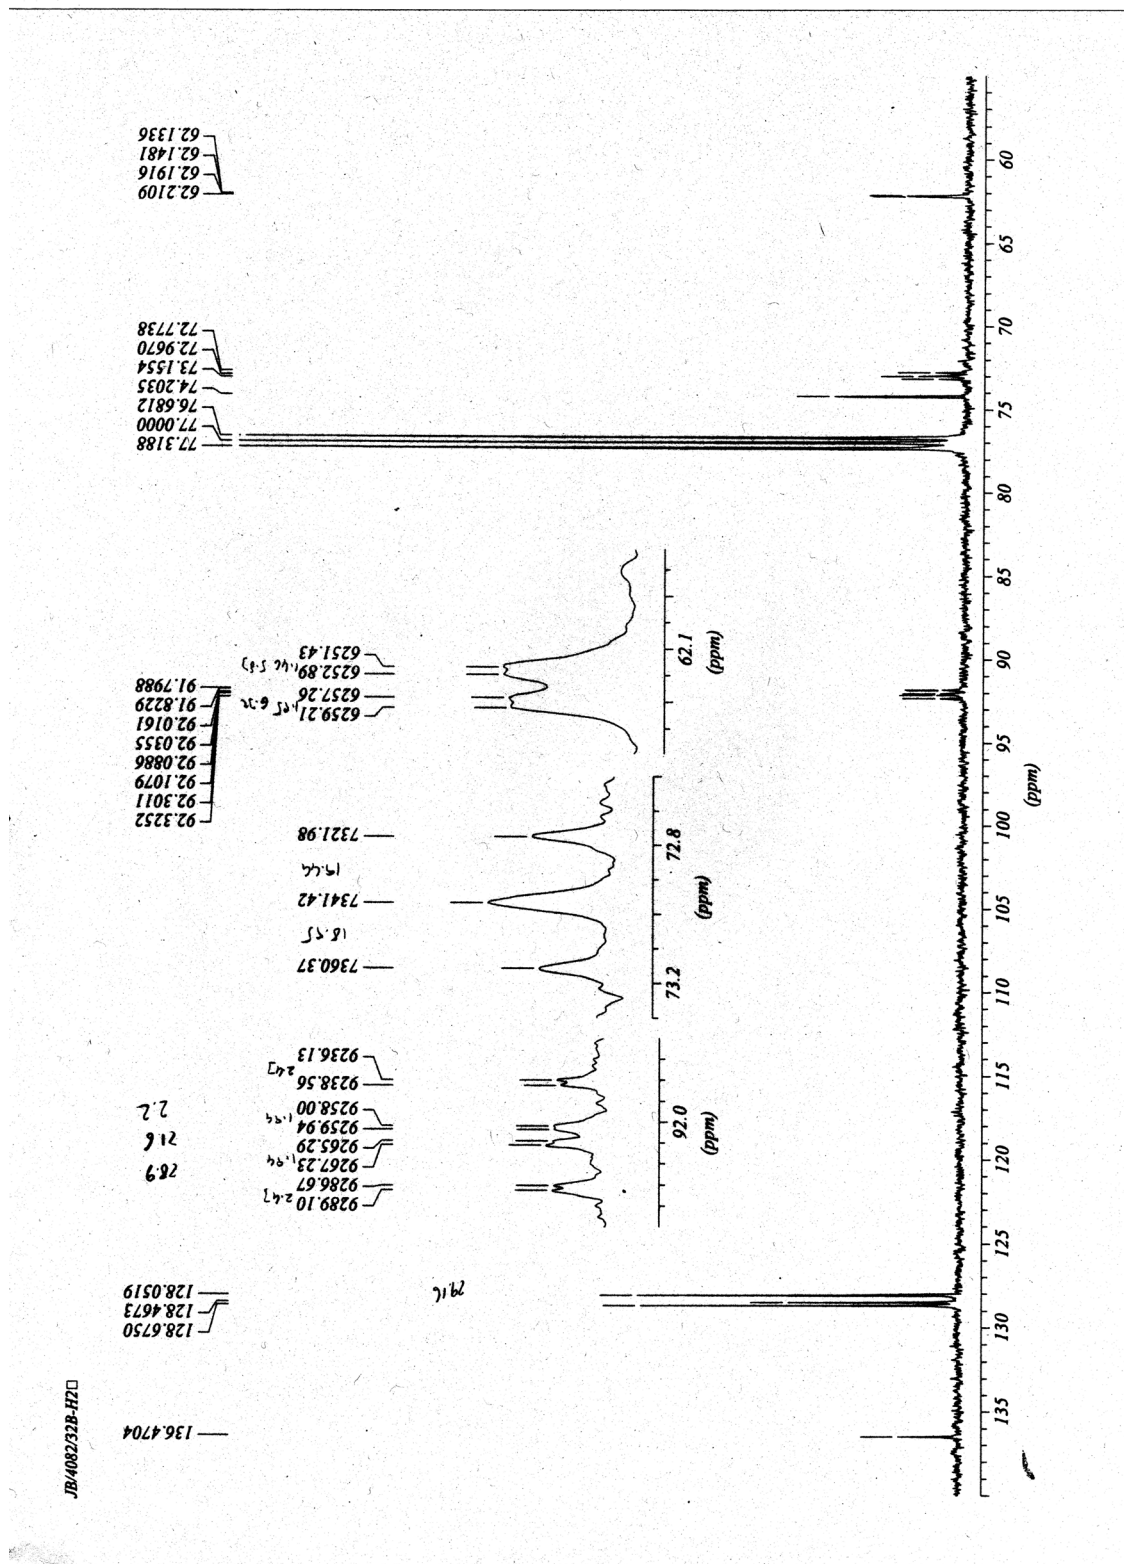

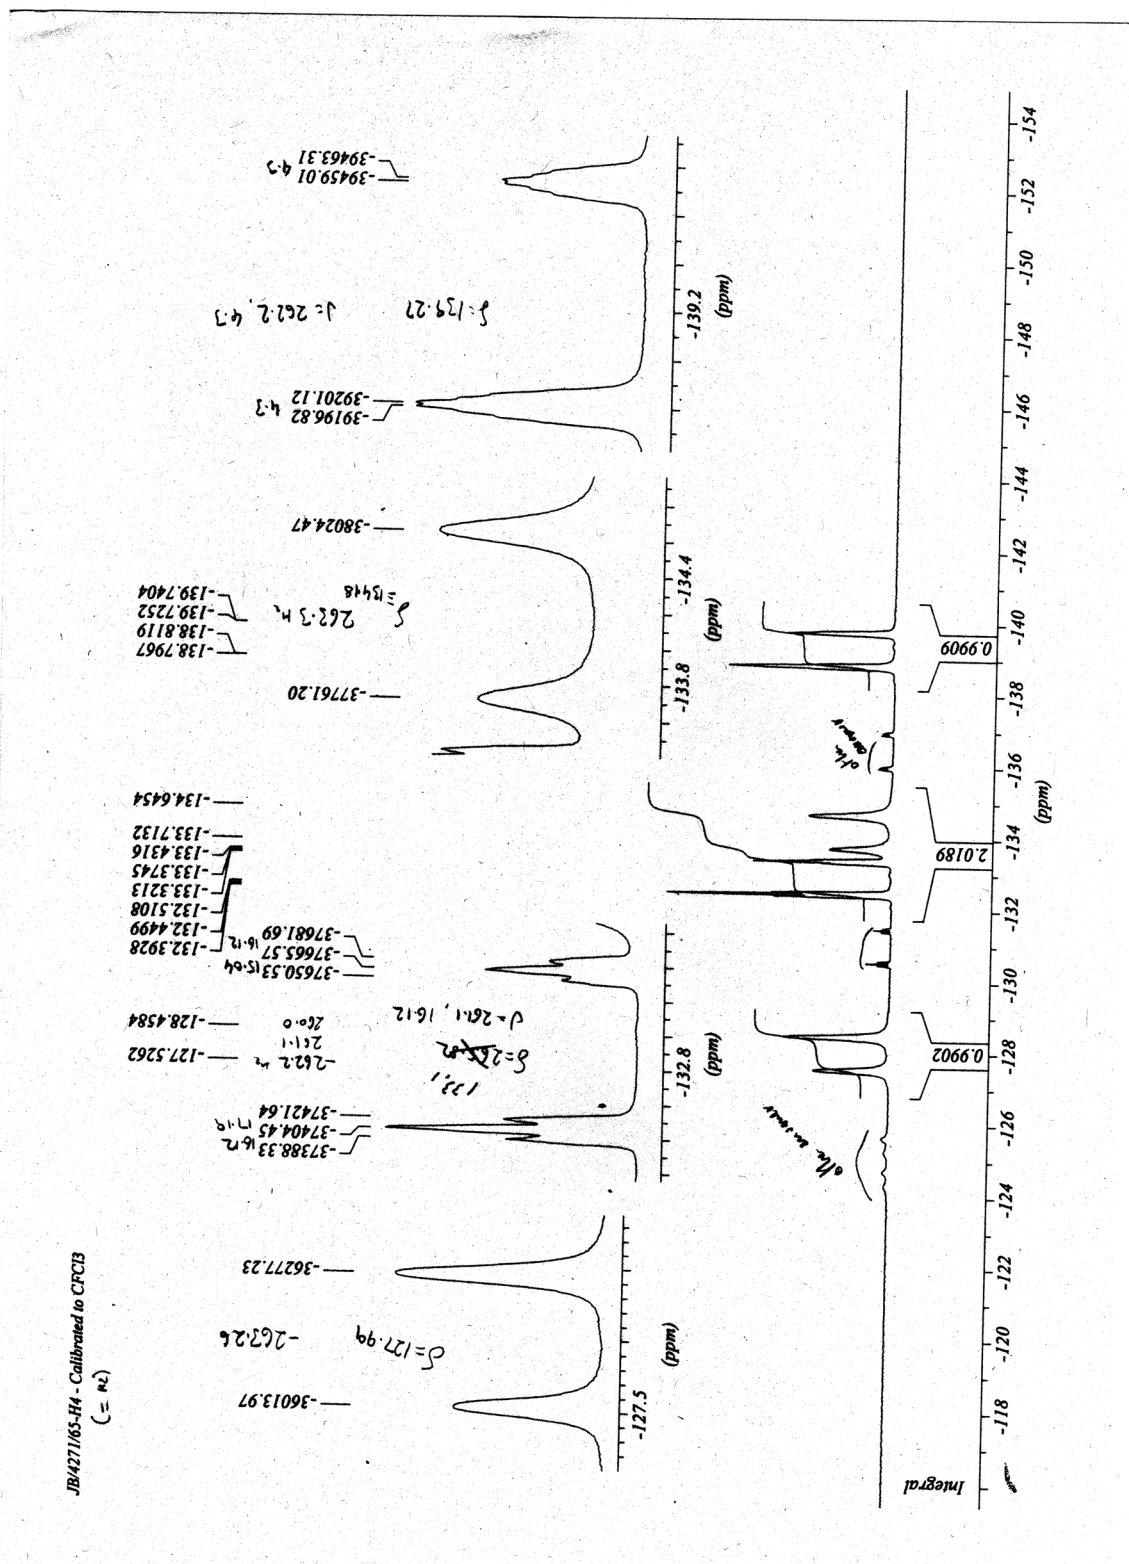

**(5R)-2,5-Bisbenzyloxymethyl-3,3,4,4-tetrafluoro-tetrahydropyran-2-ol (5)**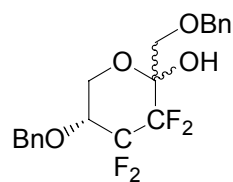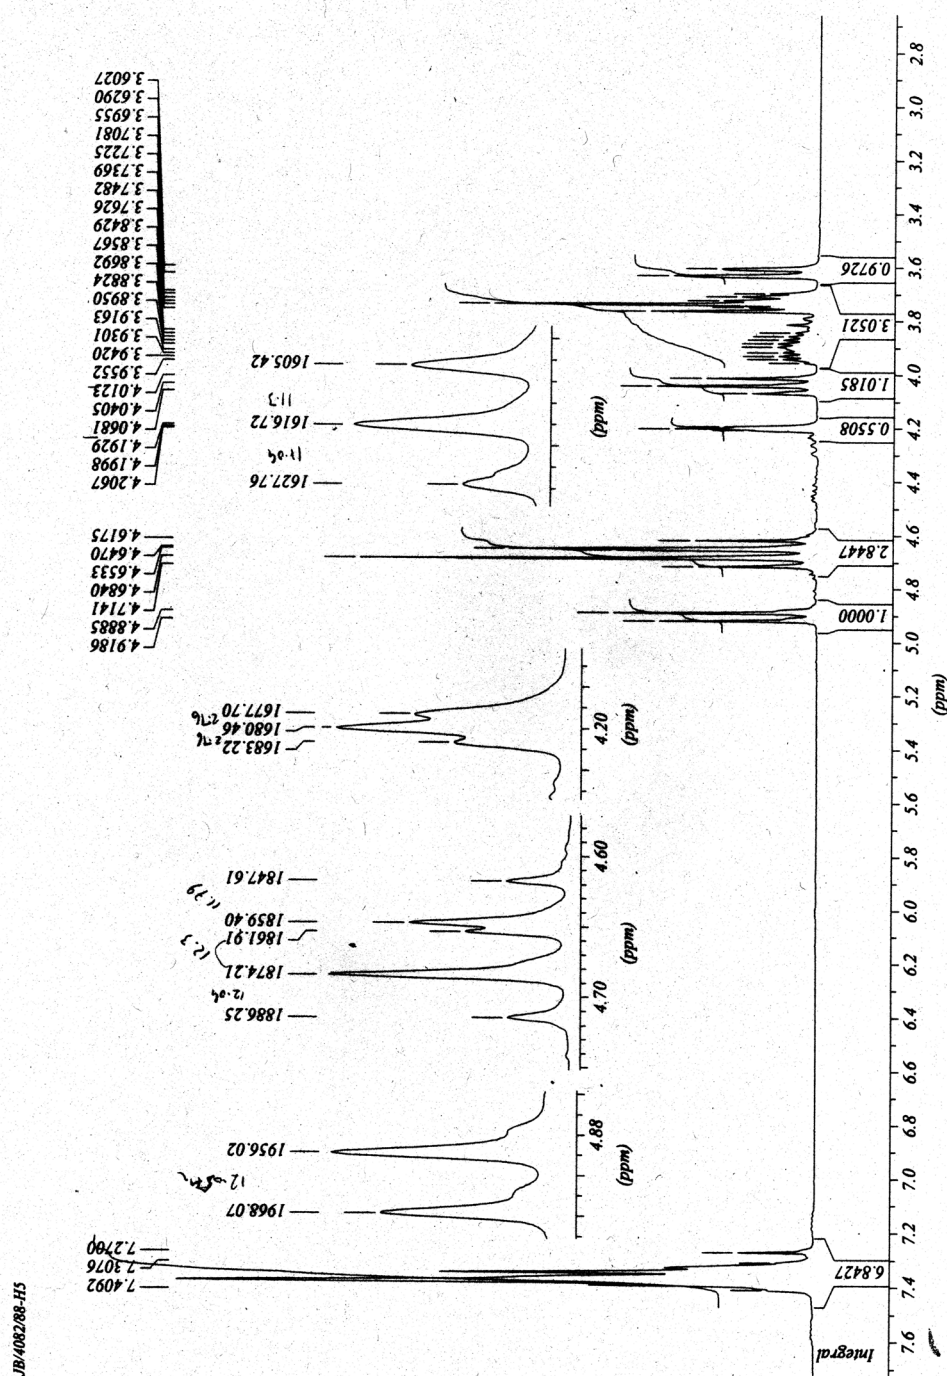

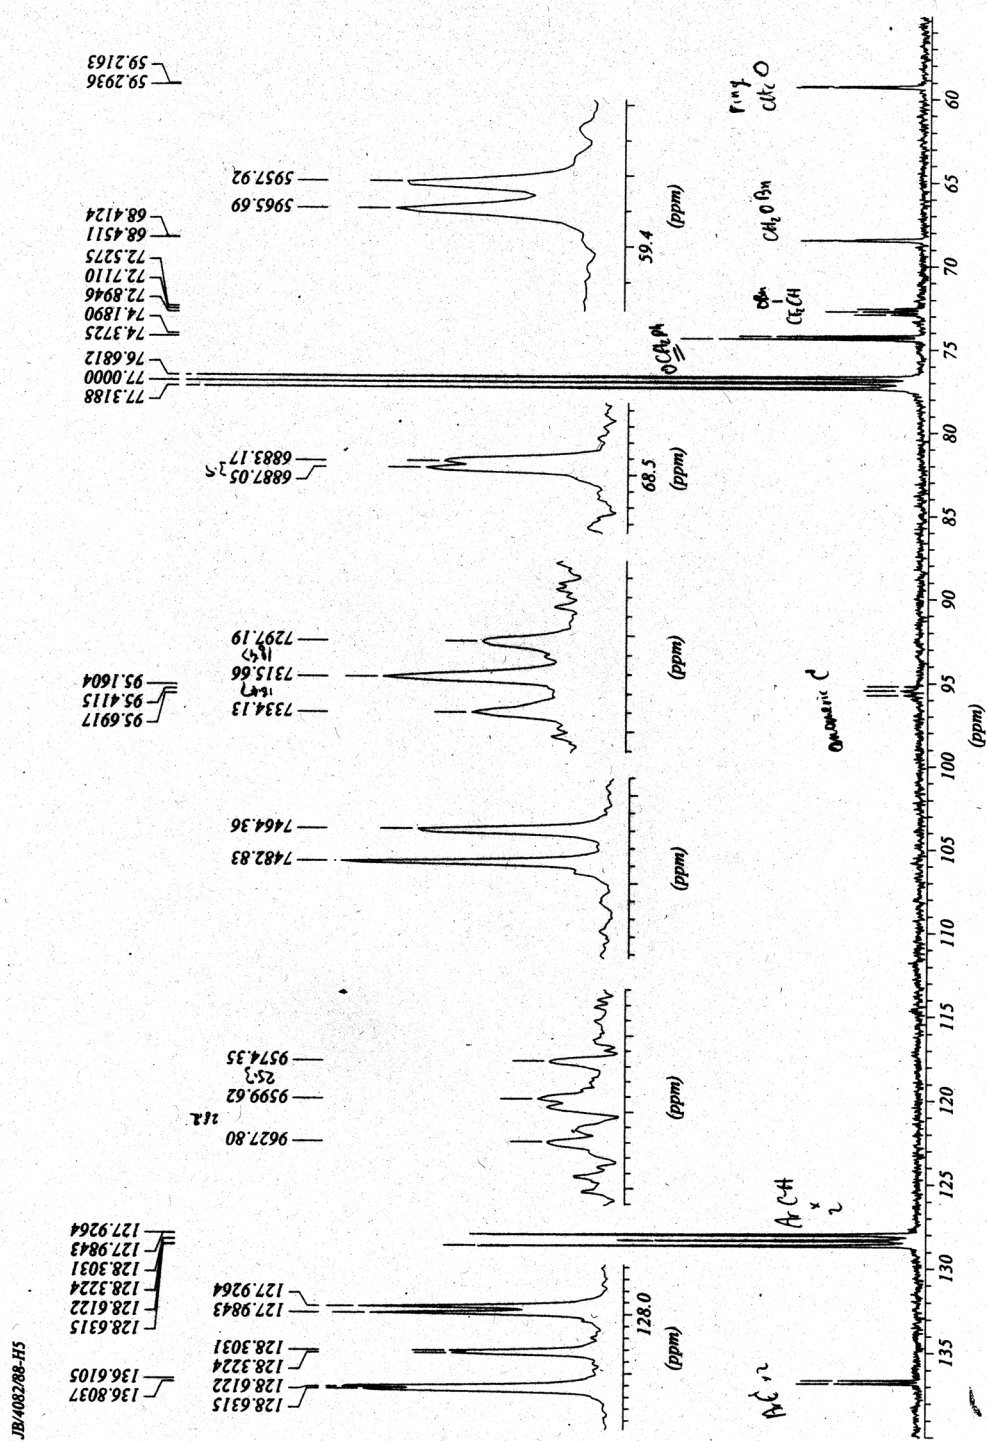

23/02/2008 11:40:48  
JB427164-F3

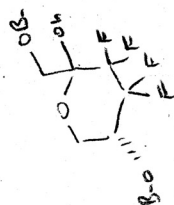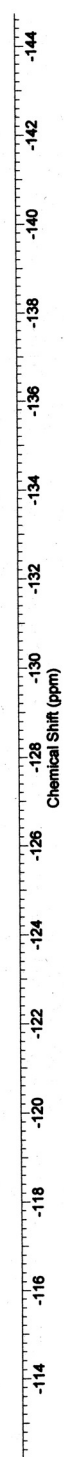

**(5R)-3,3,4,4-Tetrafluoro-tetrahydropyran-2,5-diol (6)**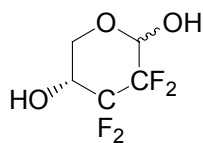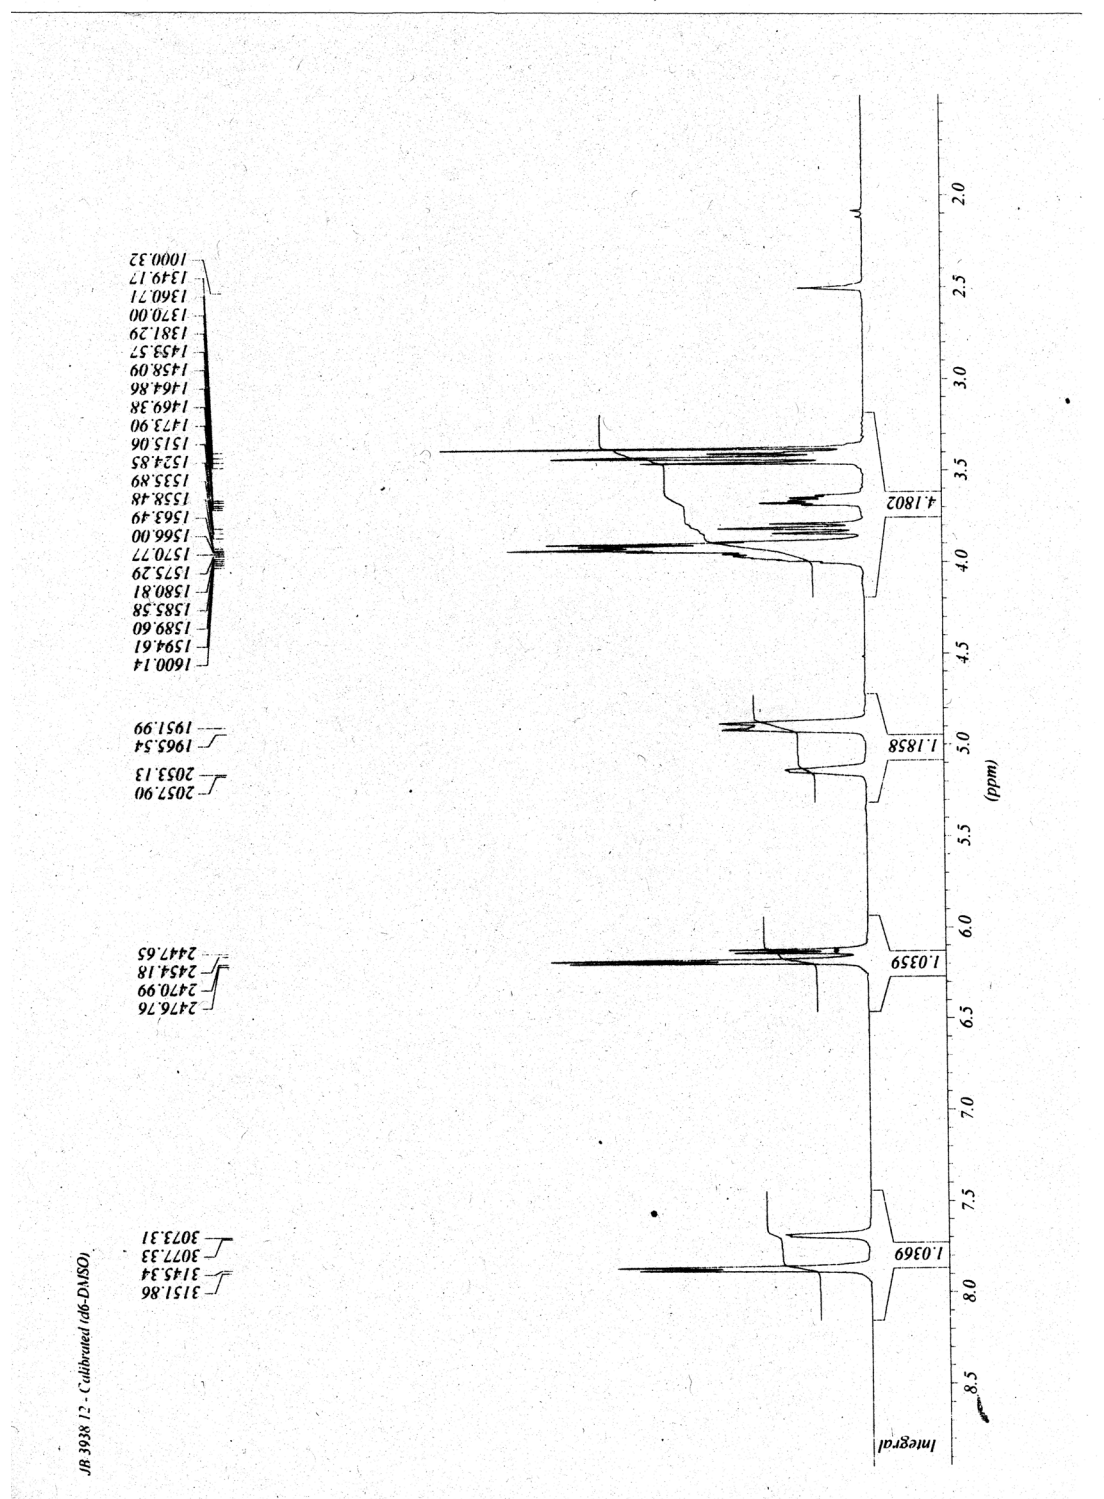



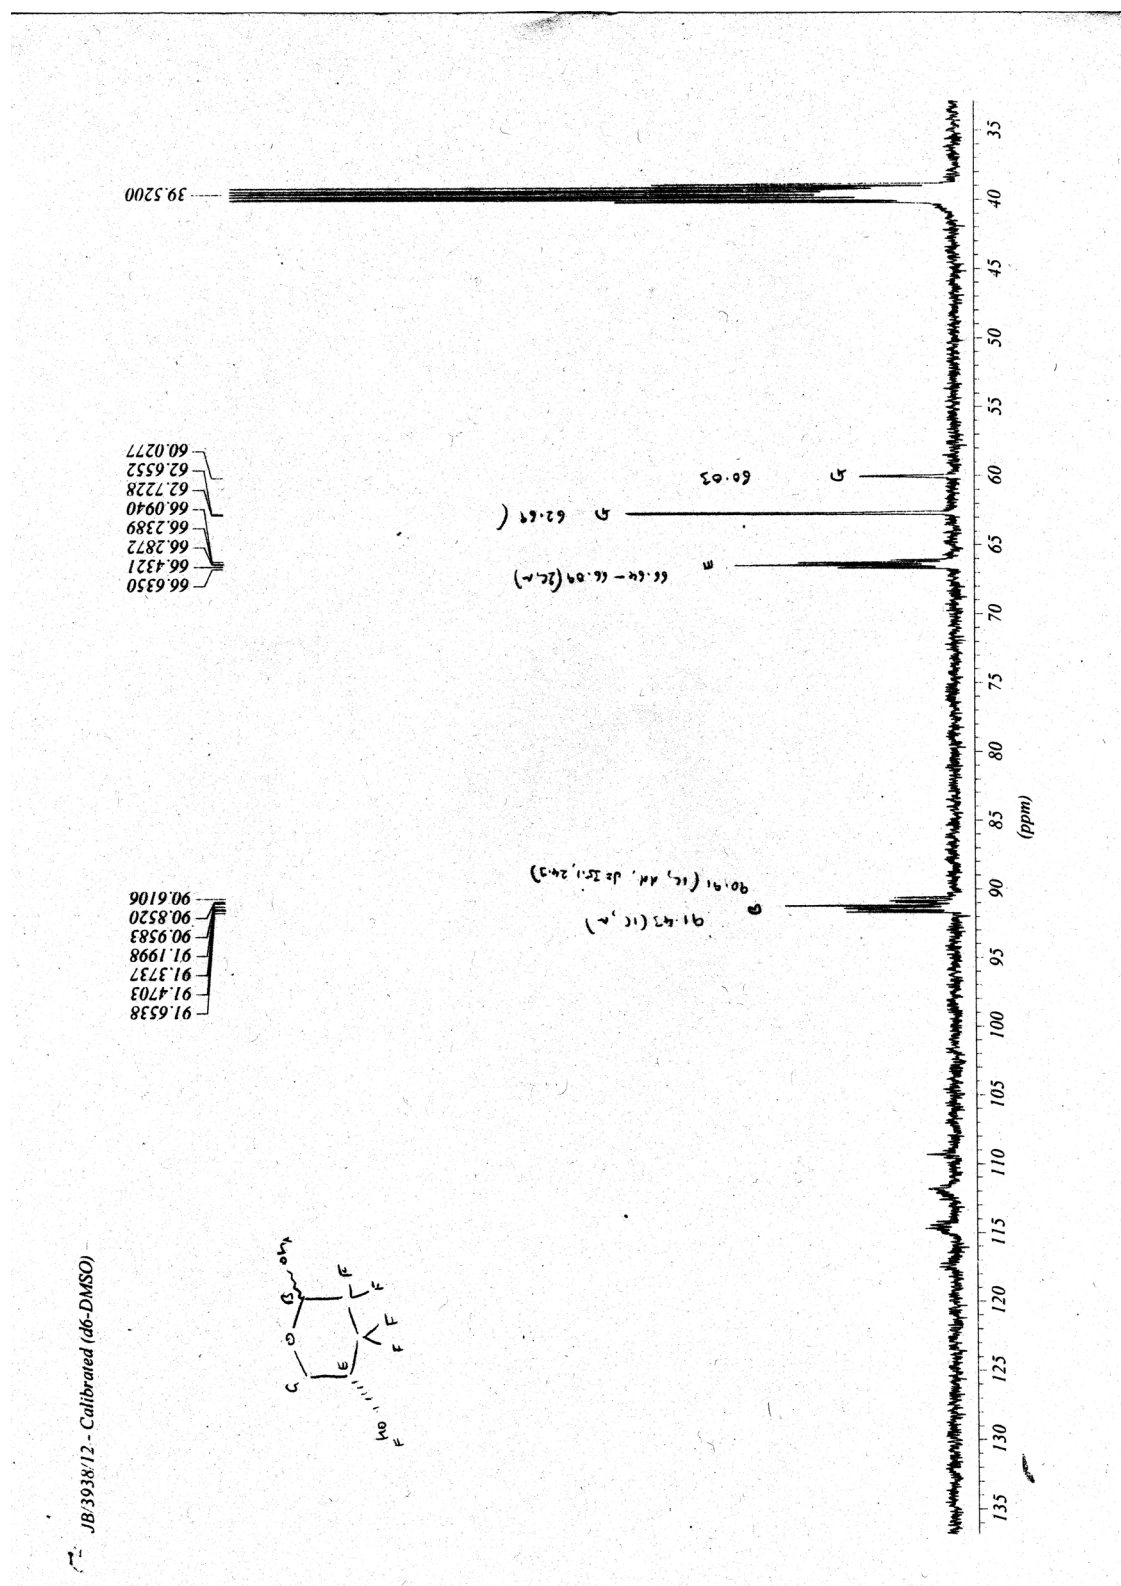

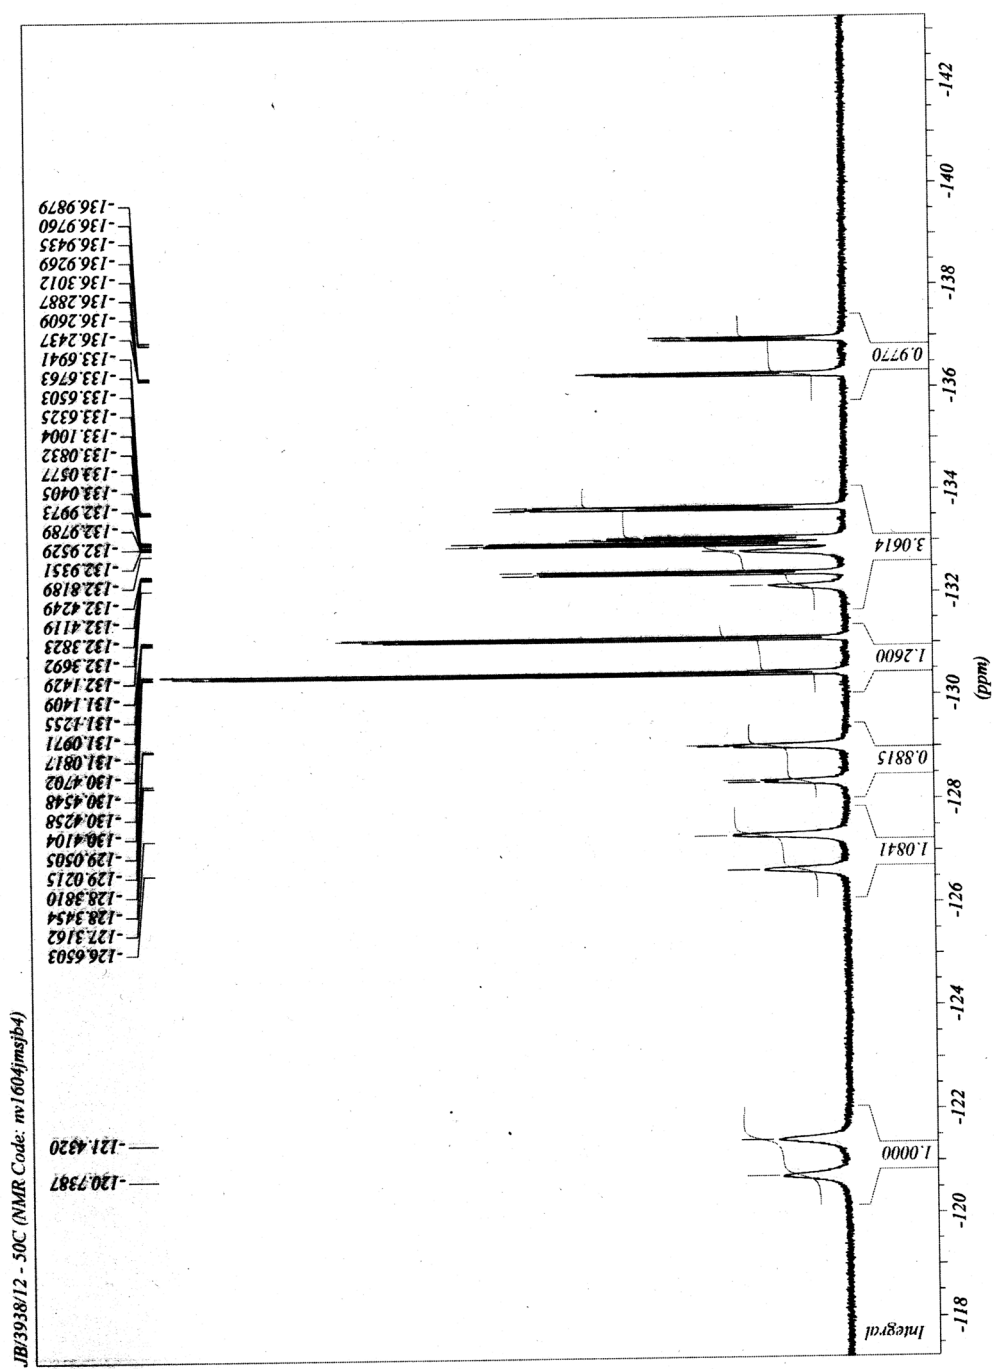

**(5R)-2,5-bishydroxymethyl-3,3,4,4-tetrafluoro-tetrahydropuran-2-ol**  
**(7)**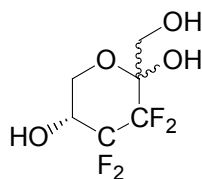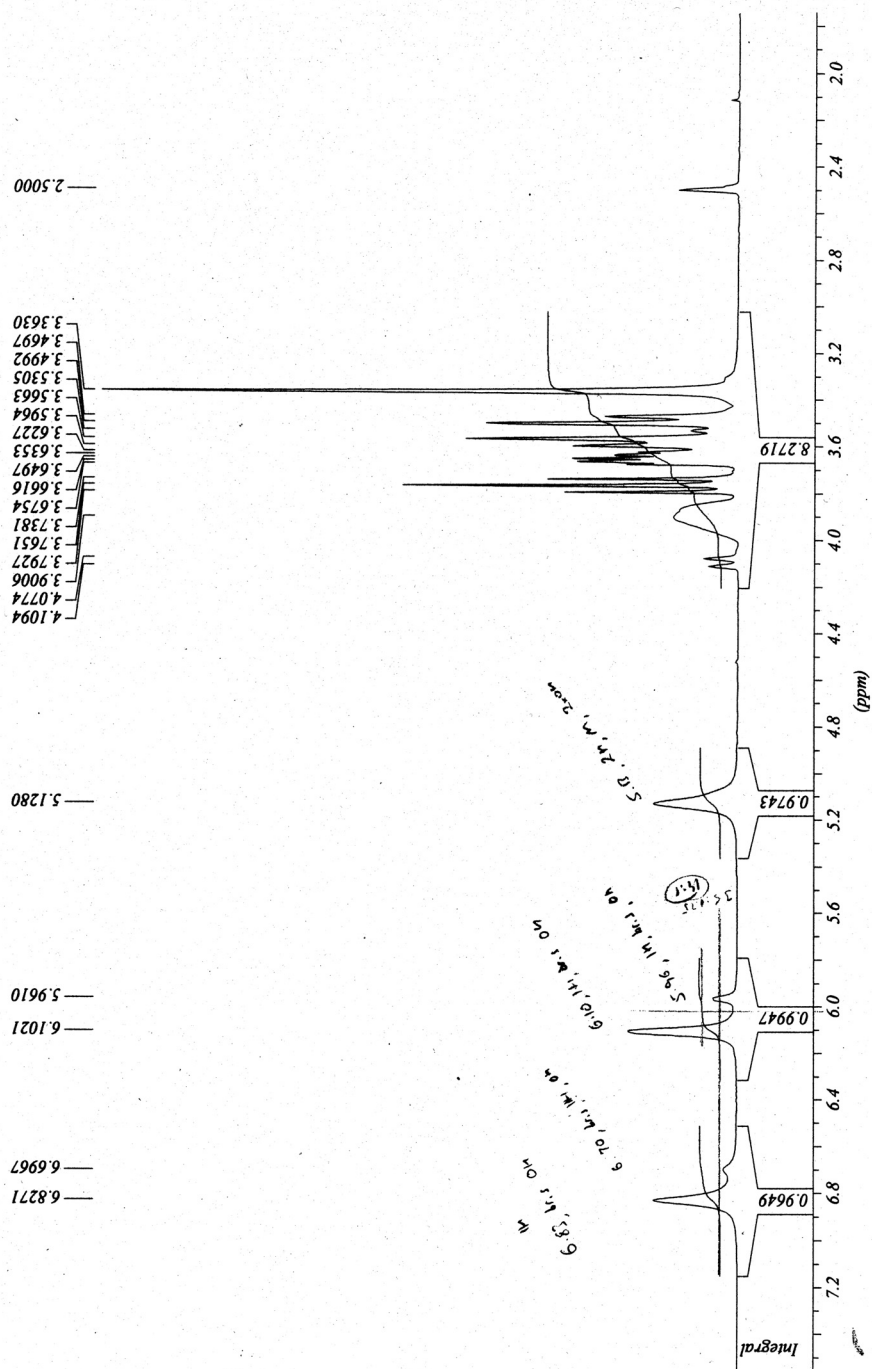

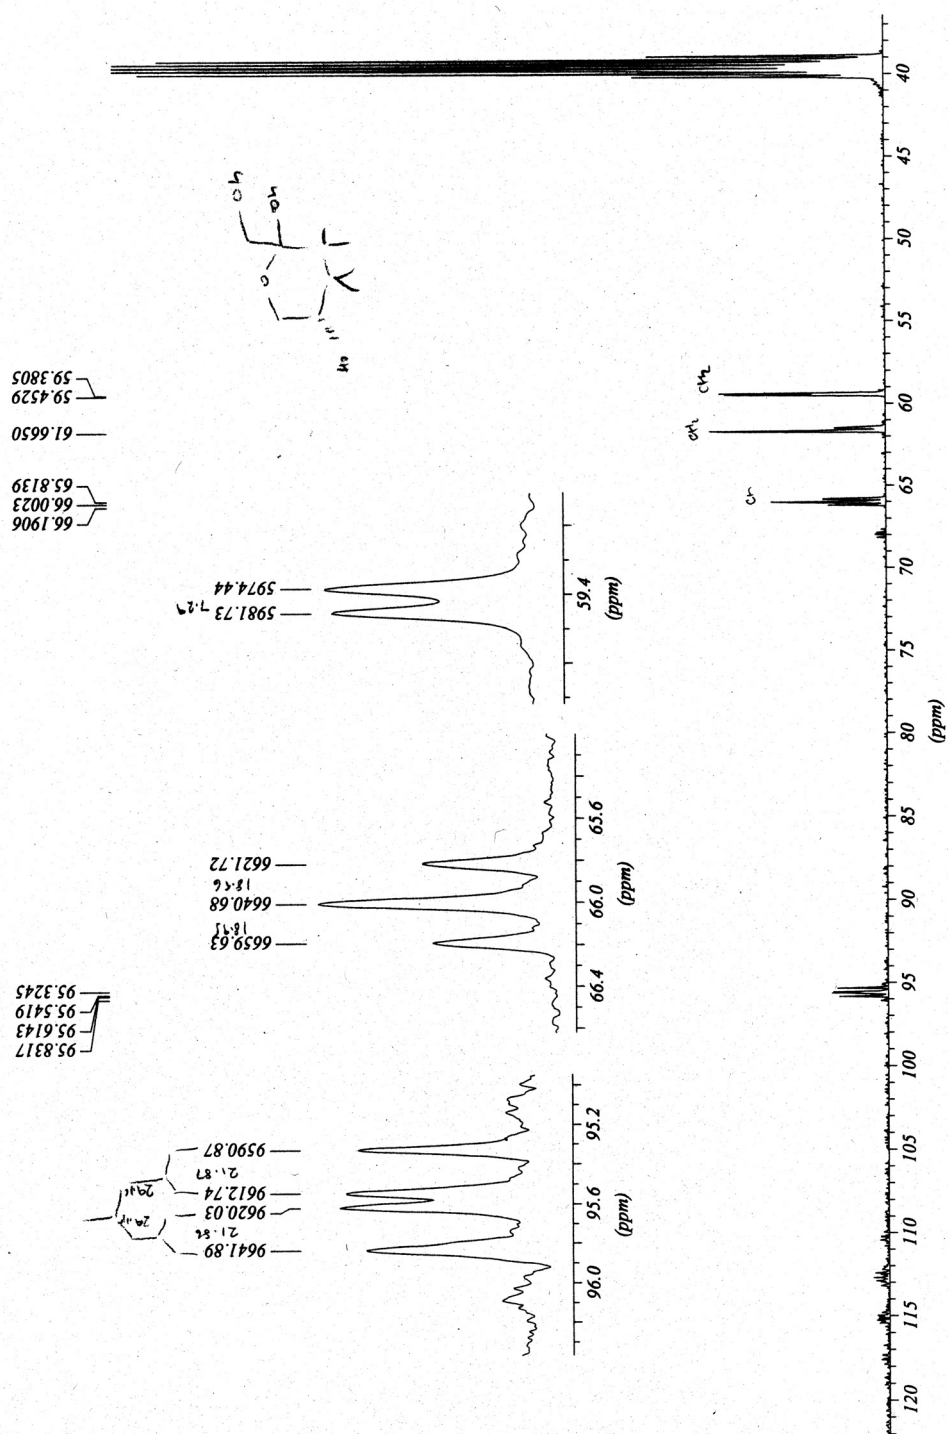

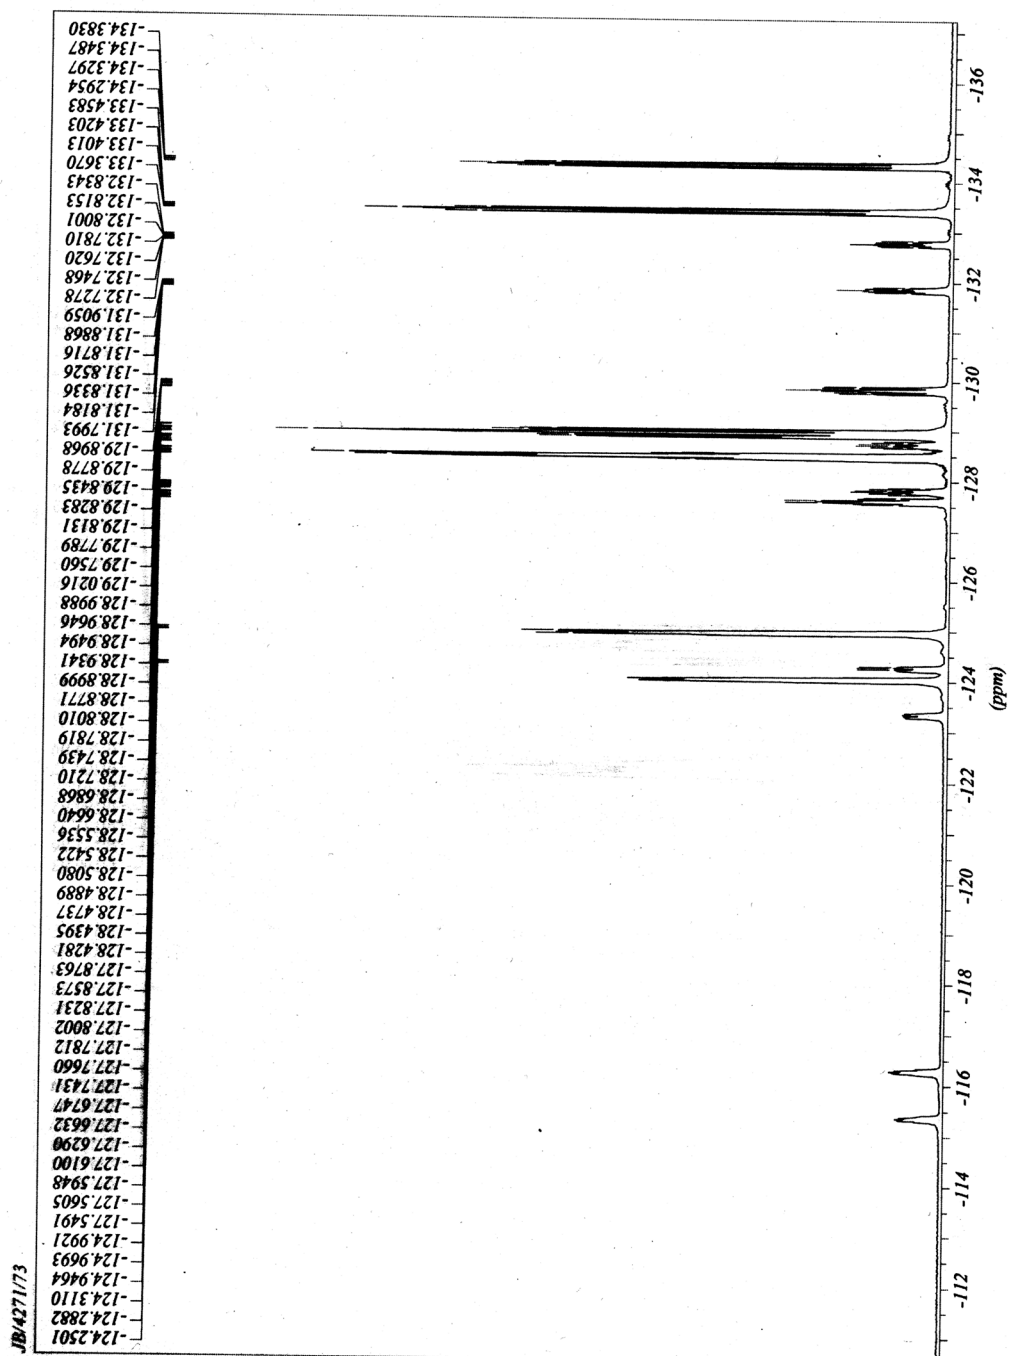

Supplement: b817260a.pdf [file b817260a.pdf]
